# Supplementary material
Source: MDPI journal article supplement (https://www.mdpi.com/1424-8247/15/2/226)

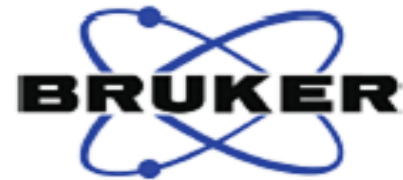

Current Data Parameters  
NAME KE-1  
EXPNO 2  
PROCNO 1

F2 - Acquisition Parameters  
Date\_ 20200927  
Time 14.29  
INSTRUM spect  
PROBHD 5 mm PABBO BB/  
PULPROG zgpg30  
TD 65536  
SOLVENT DMSO  
NS 2682  
DS 4  
SWH 24038.461 Hz  
FIDRES 0.366798 Hz  
AQ 1.3631488 sec  
RG 205.37  
DW 20.800 usec  
DE 6.50 usec  
TE 300.0 K  
D1 2.00000000 sec  
D11 0.03000000 sec  
TD0 1

----- CHANNEL f1 -----  
SFO1 100.6278588 MHz  
NUC1 13C  
P1 10.00 usec  
PLW1 47.00000000 W

----- CHANNEL f2 -----  
SFO2 400.1516006 MHz  
NUC2 1H  
CPDPRG[2] waltz16  
PCPD2 90.00 usec  
PLW2 18.00000000 W  
PLW12 0.34722000 W  
PLW13 0.28125000 W

F2 - Processing parameters  
SI 32768  
SF 100.6177975 MHz  
WDW EM  
SSB 0  
LB 1.00 Hz  
GB 0  
PC 1.40

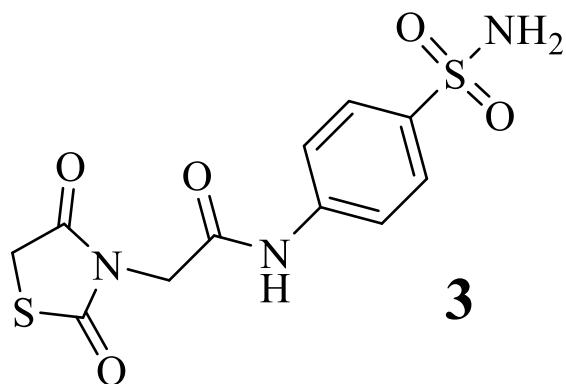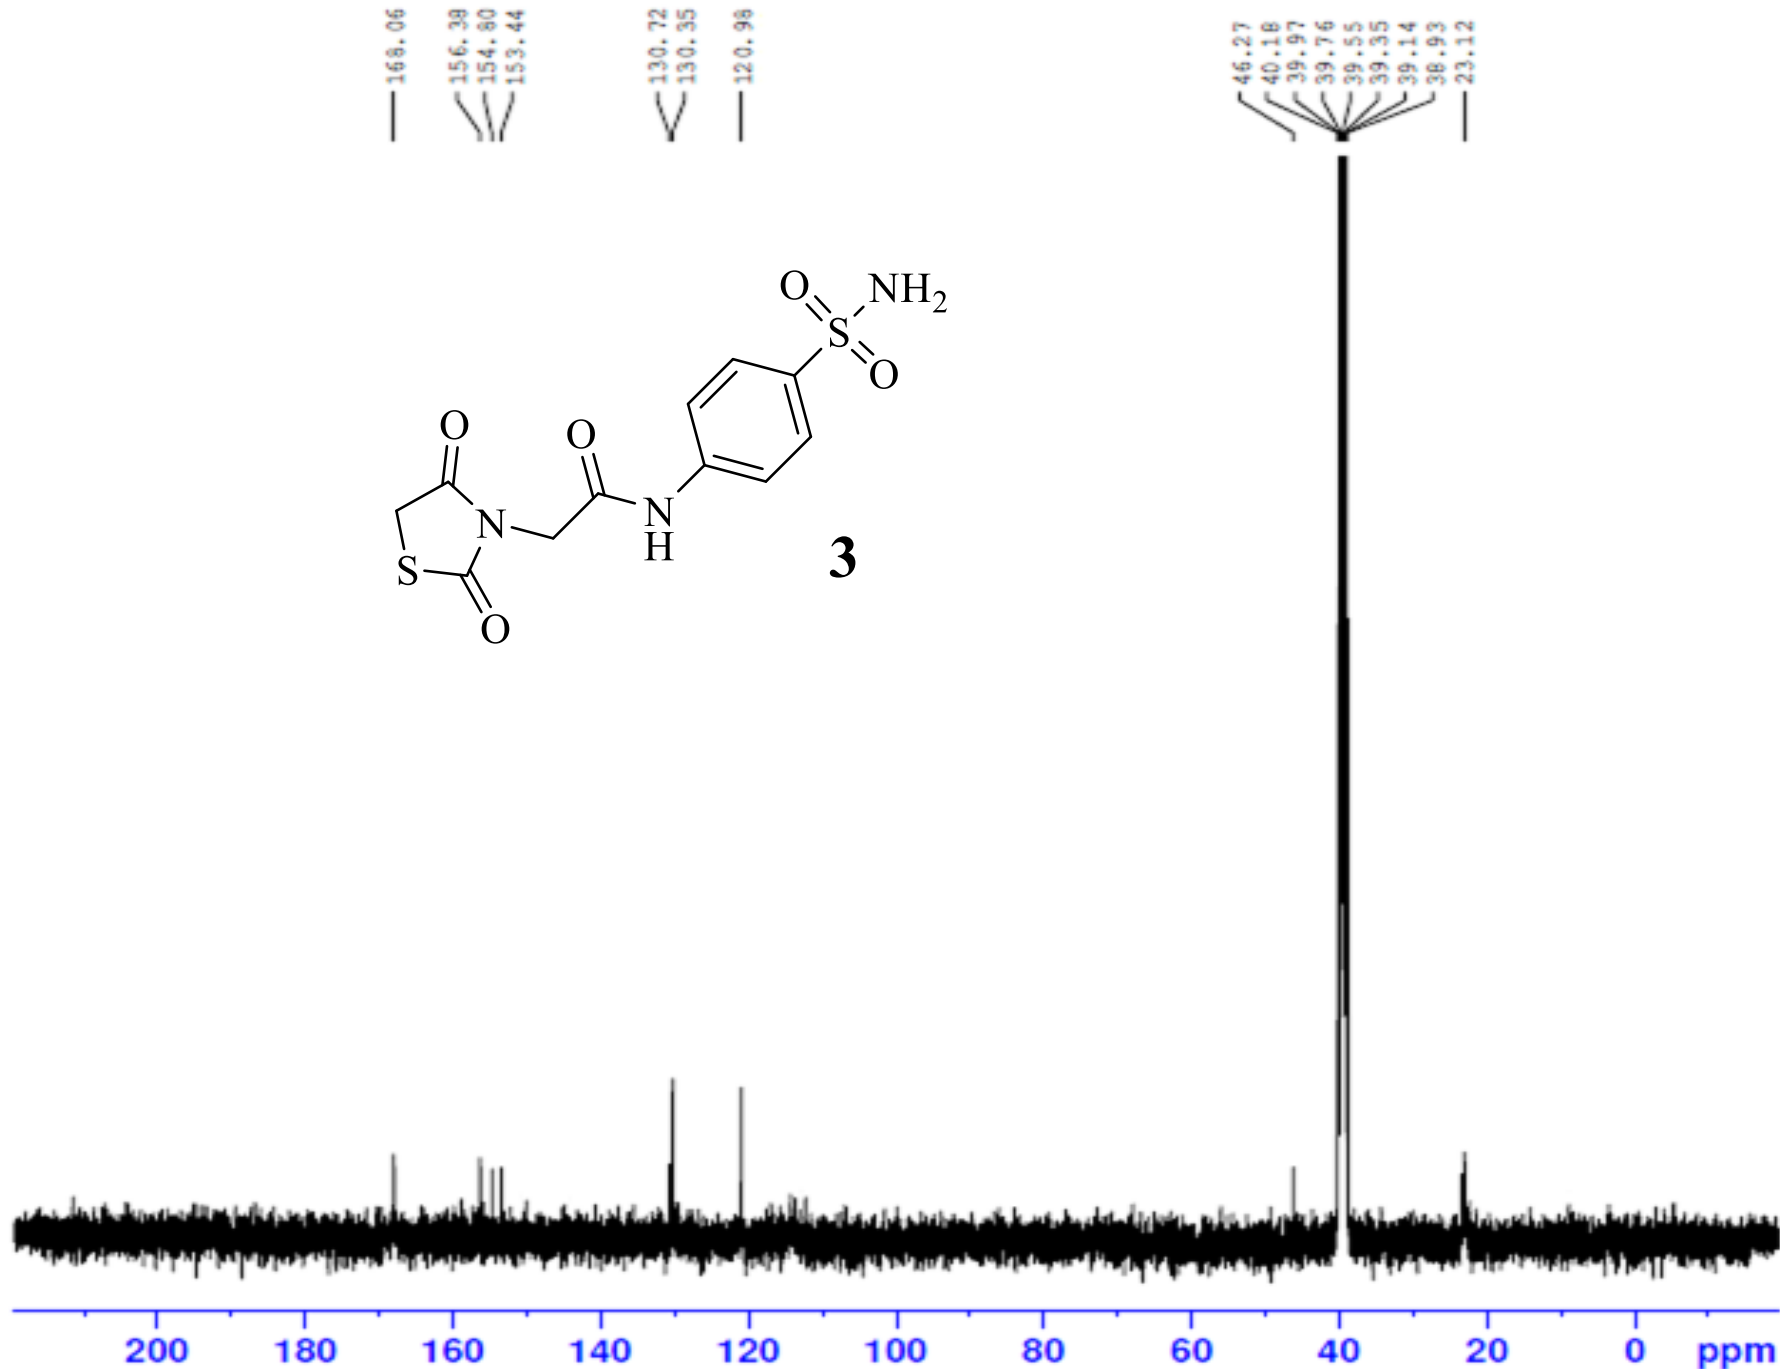

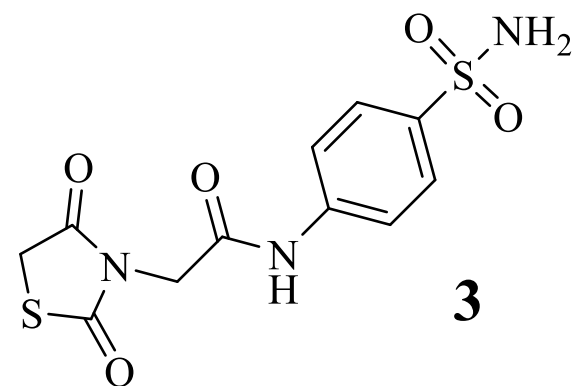

Relative Abundance

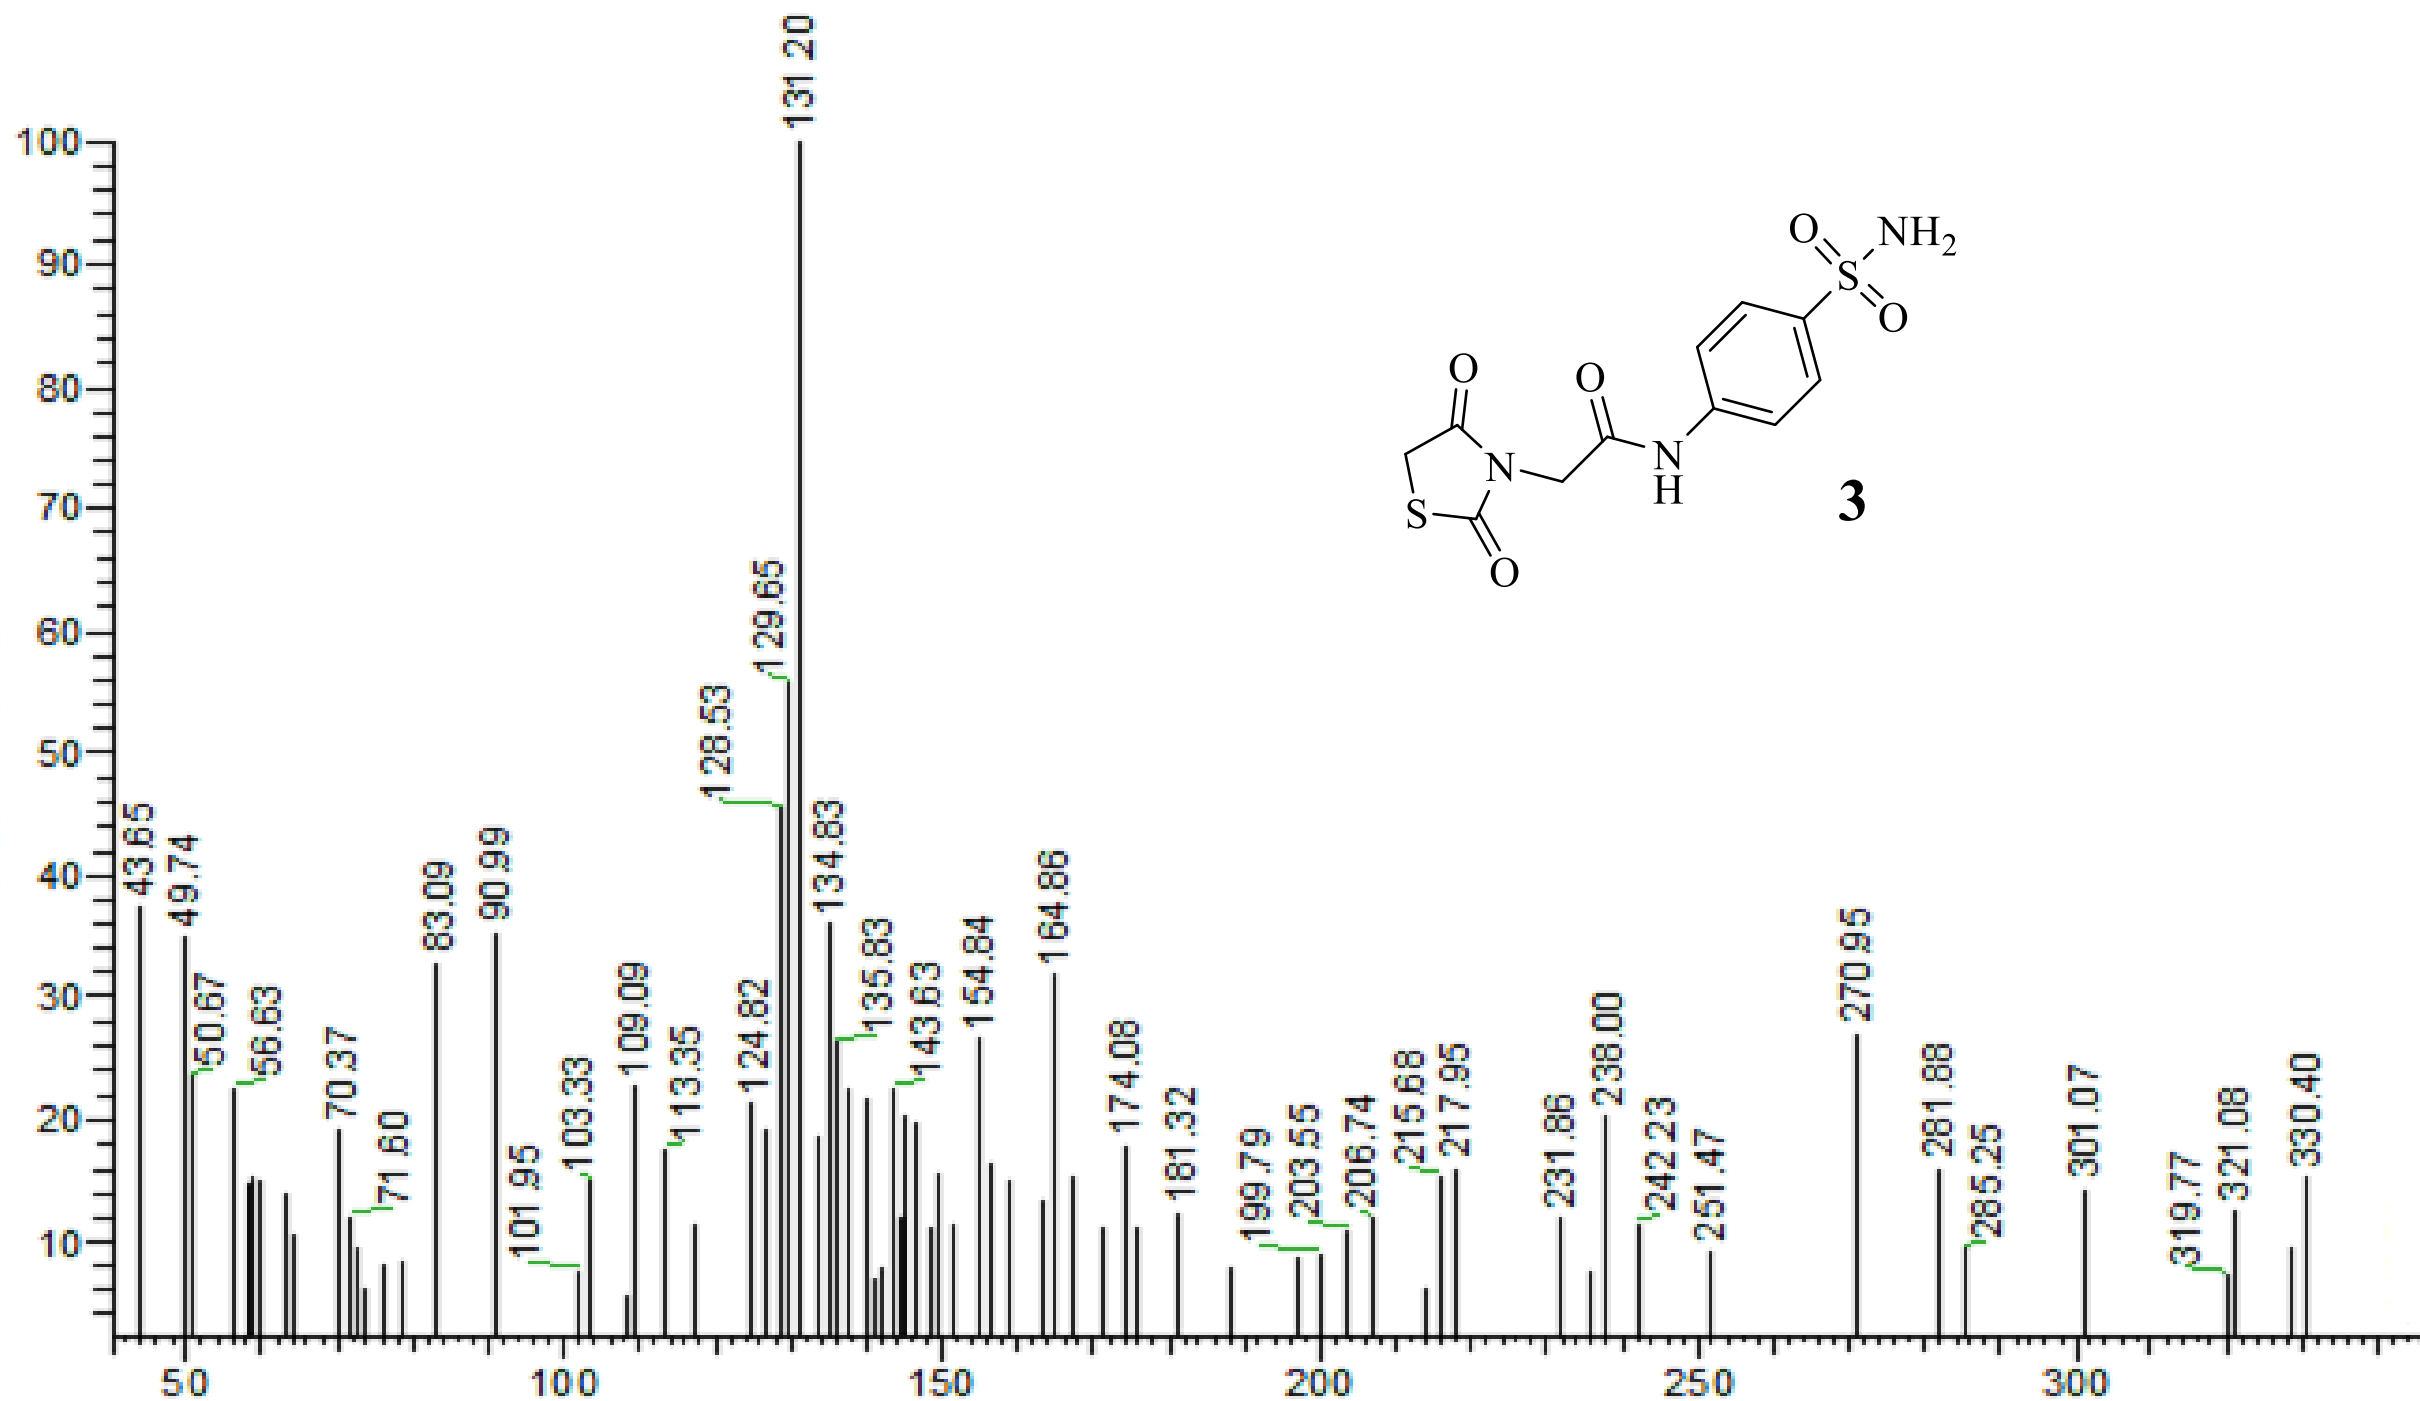

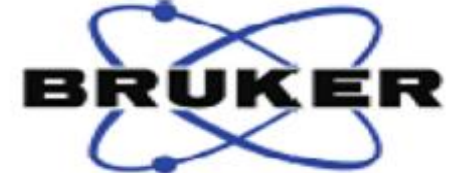

Current Data Parameters  
NAME M  
EXPNO 1  
PROCNO 1

F2 - Acquisition Parameters  
Date\_ 20180410  
Time 11.19  
INSTRUM spect  
PROBHD 5 mm PABBO BB/  
PULPROG zg30  
TD 65536  
SOLVENT DMSO  
NS 53  
DS 2  
SWH 8012.820 Hz  
FIDRES 0.122266 Hz  
AQ 4.0894465 sec  
RG 205.37  
DW 62.400 usec  
DE 6.50 usec  
TE 298.0 K  
D1 1.00000000 sec  
TD0 1

===== CHANNEL f1 =====  
SFO1 400.1524711 MHz  
NUC1 1H  
P1 12.00 usec  
PLW1 18.00000000 W

F2 - Processing parameters  
SI 65536  
SF 400.1500000 MHz  
WDW EM  
SSB 0  
LB 0.30 Hz  
GB 0  
PC 1.00

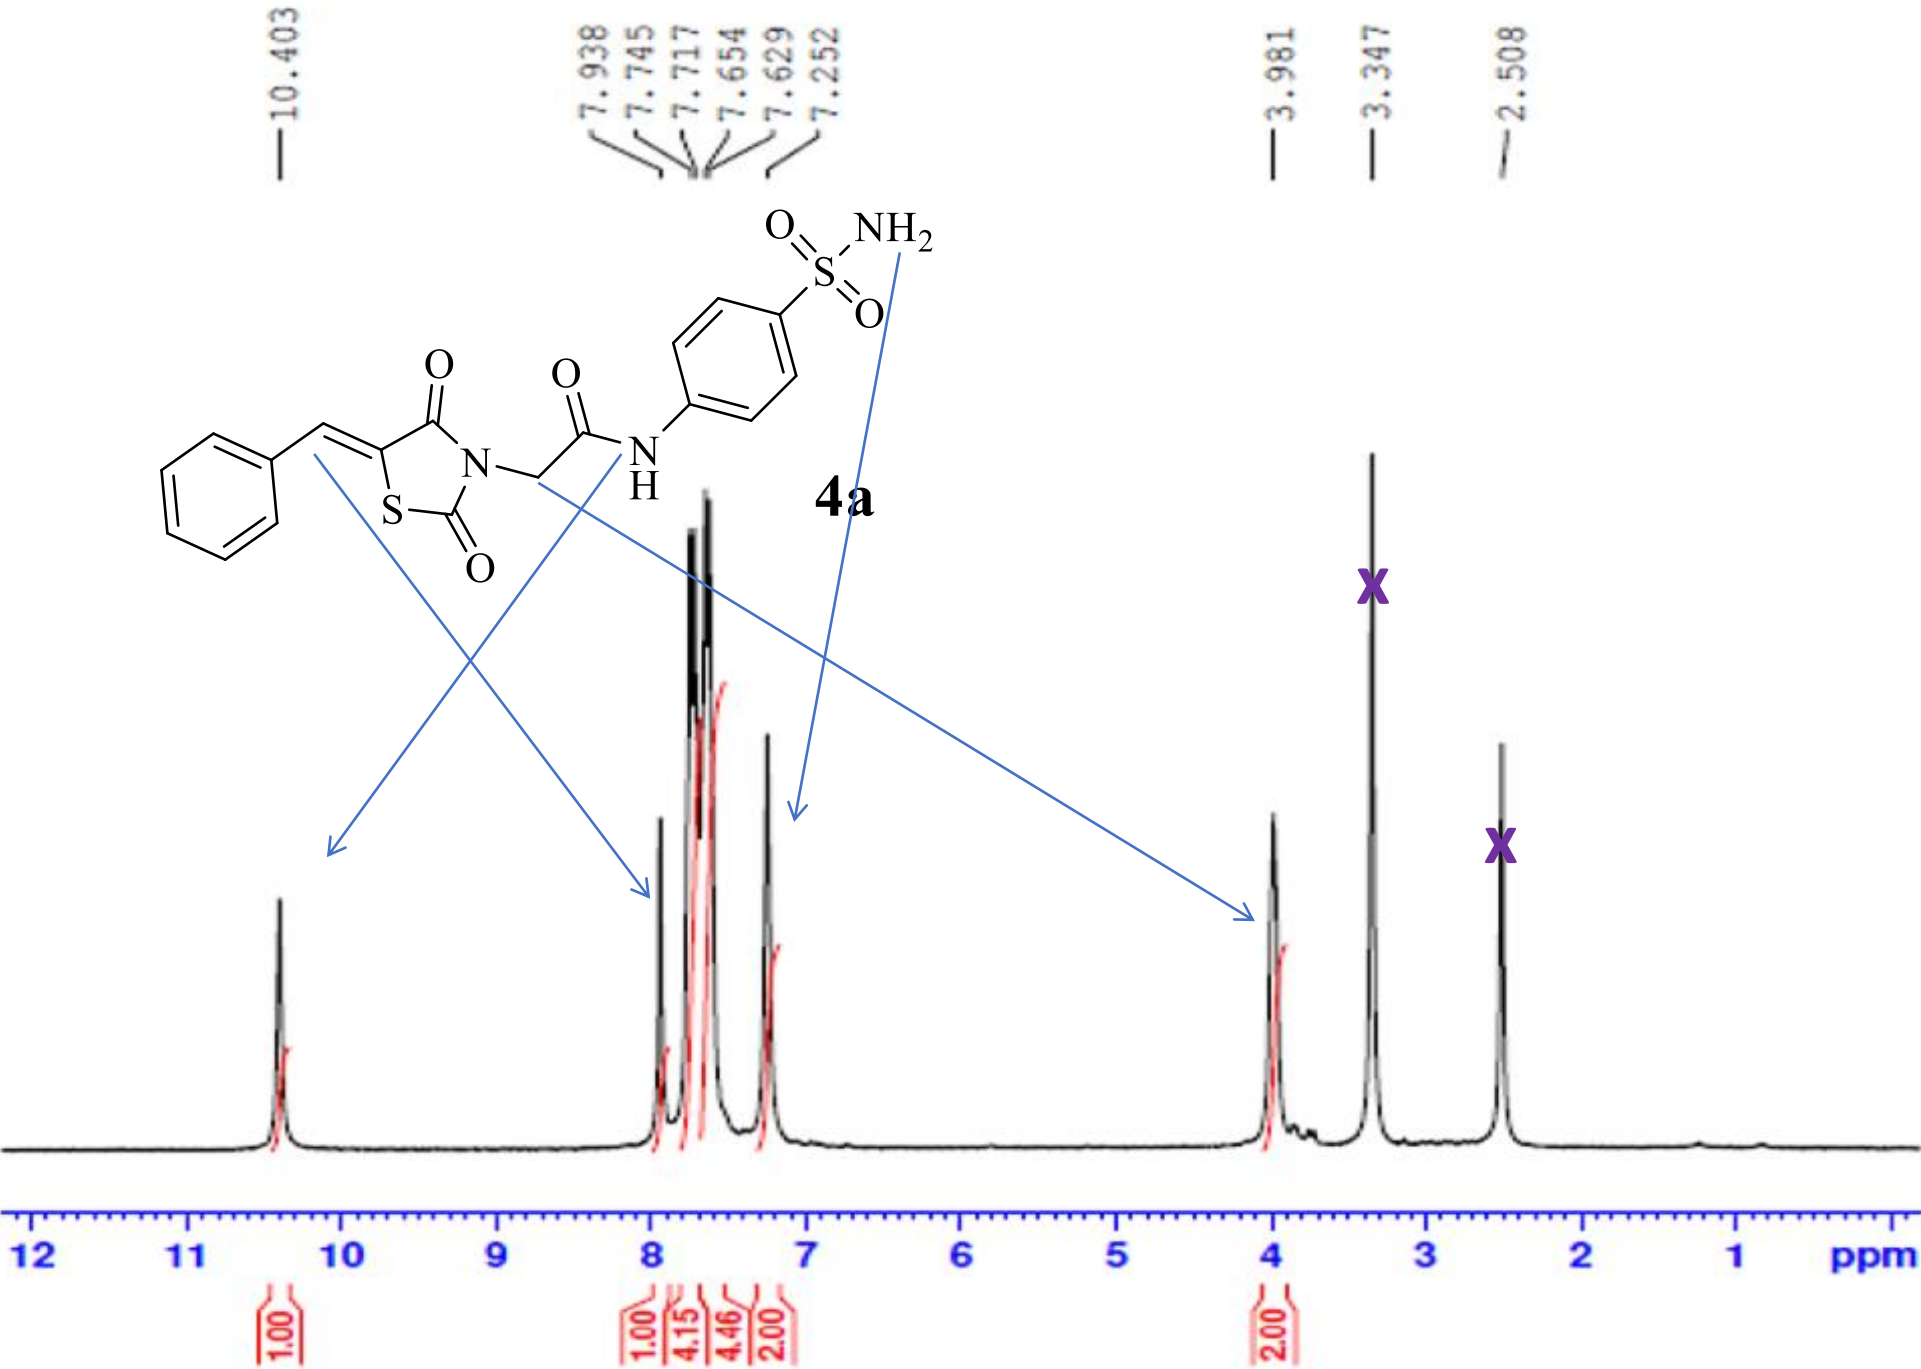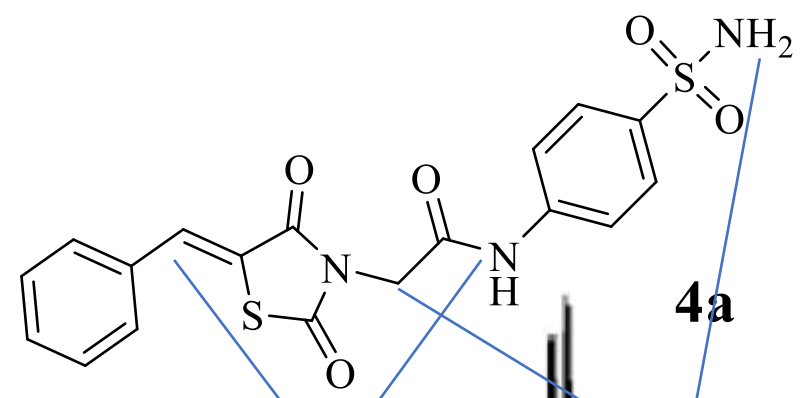

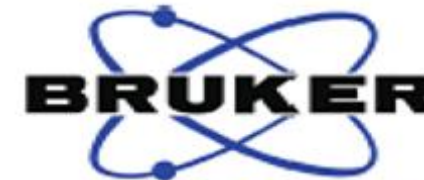

Current Data Parameters  
NAME M-d2o  
EXPNO 1  
PROCNO 1

F2 - Acquisition Parameters  
Date\_ 20180410  
Time 11.32  
INSTRUM spect  
PROBHD 5 mm PABBO BB/  
PULPROG zg30  
TD 65536  
SOLVENT DMSO  
NS 61  
DS 2  
SWH 8012.820 Hz  
FIDRES 0.122266 Hz  
AQ 4.0894465 sec  
RG 205.37  
DW 62.400 usec  
DE 6.50 usec  
TE 298.0 K  
D1 1.0000000 sec  
TD0 1

===== CHANNEL f1 =====  
SFO1 400.1524711 MHz  
NUC1 1H  
P1 12.00 usec  
PLW1 18.00000000 W

F2 - Processing parameters  
SI 65536  
SF 400.1500000 MHz  
WDW EM  
SSB 0  
LB 0.30 Hz  
GB 0  
PC 1.00

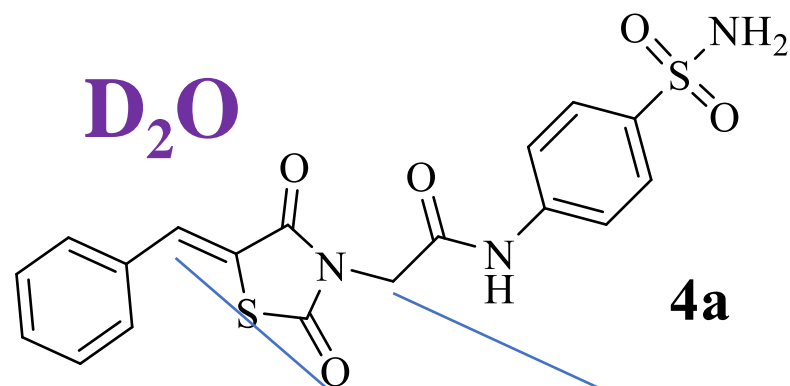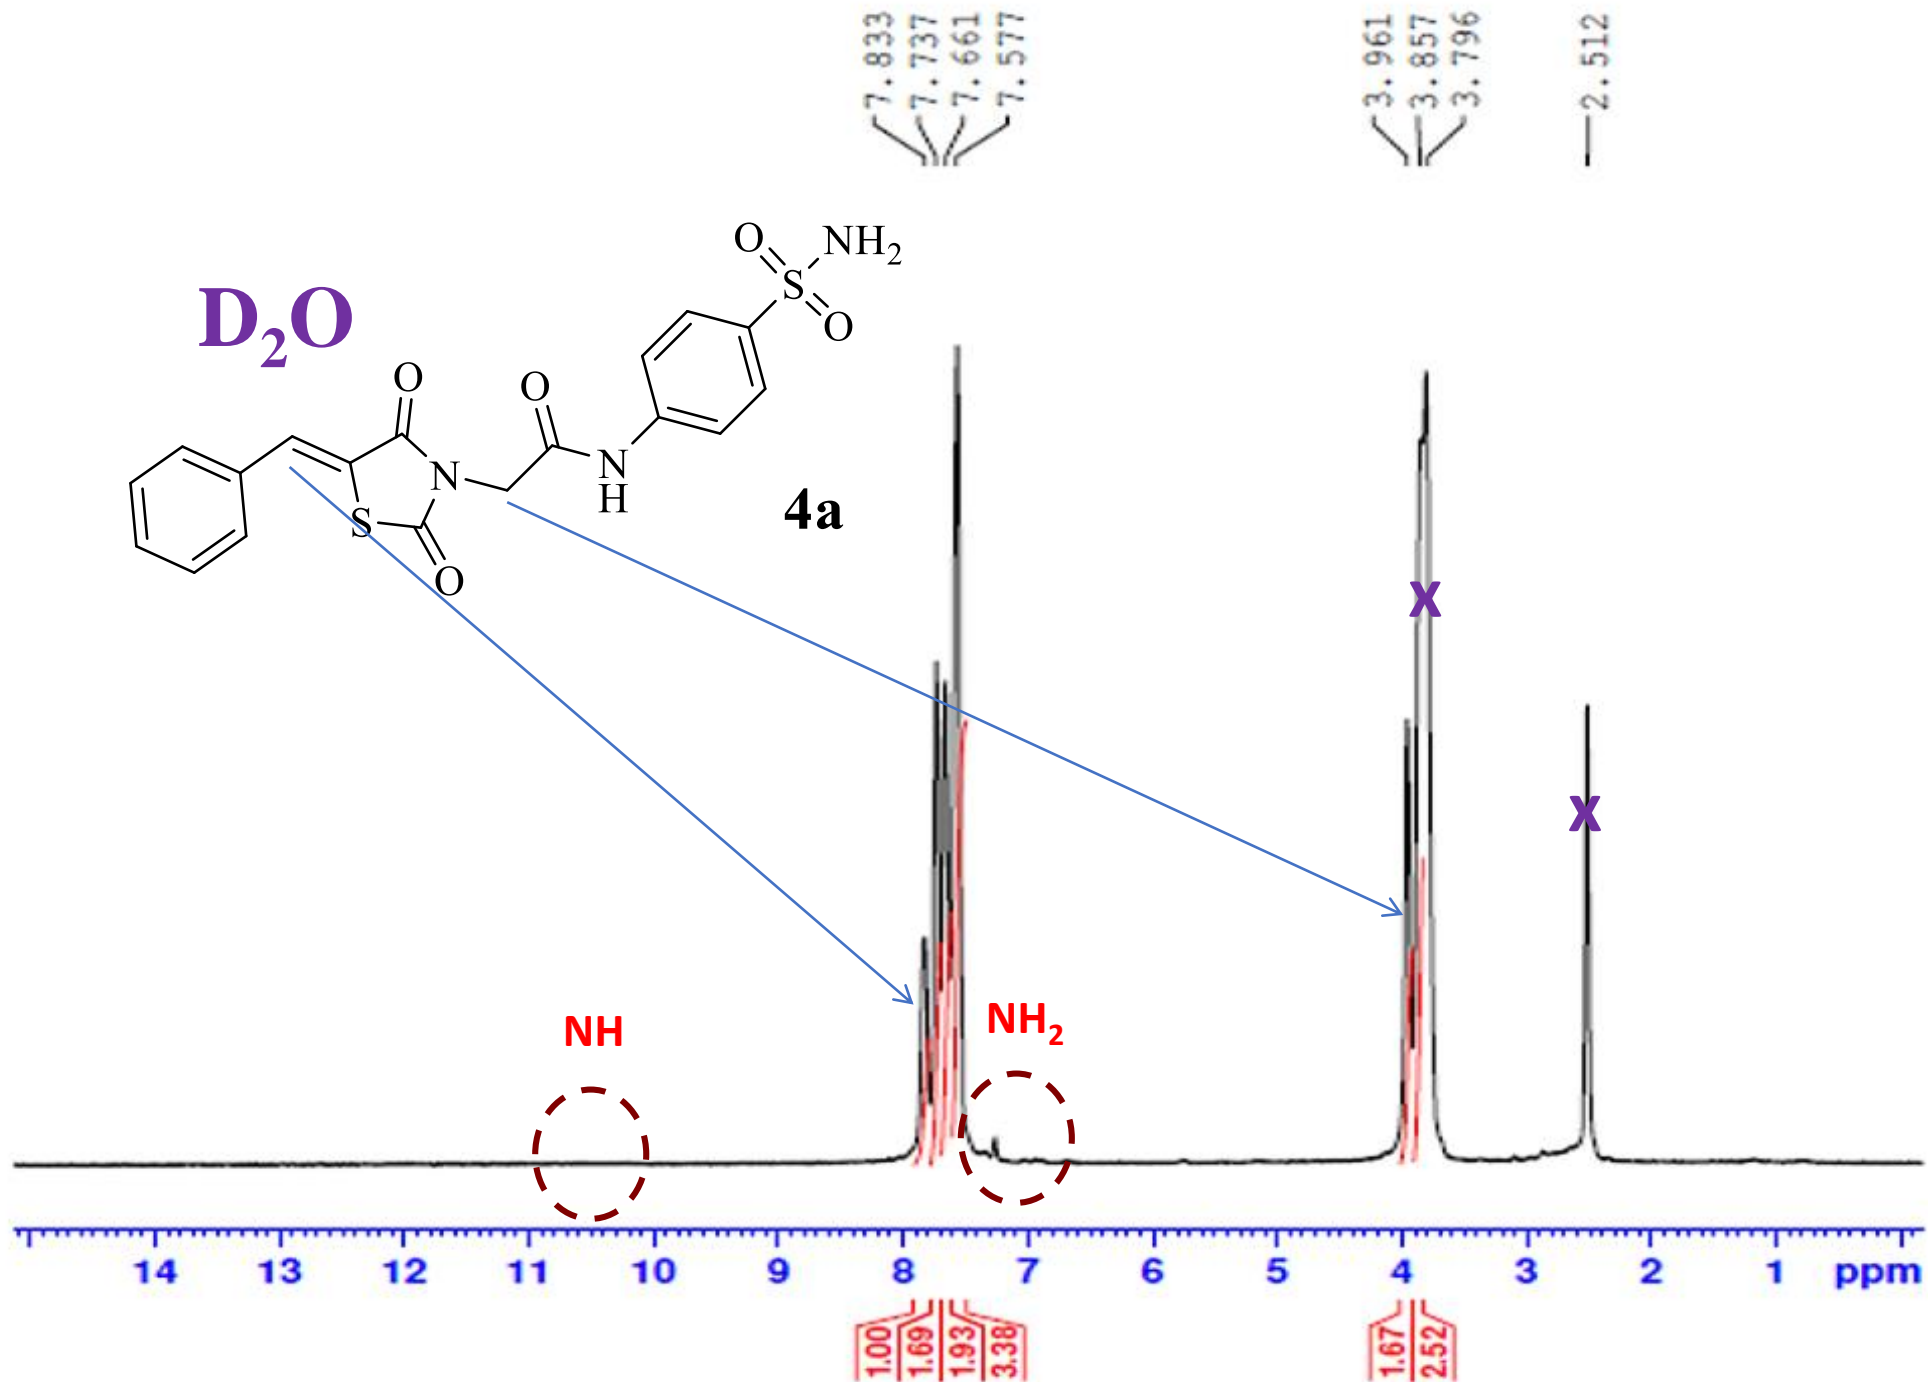

Current Data Parameters  
NAME Khalid ElAdel\_H\_3  
EXPNO 10  
PROCNO 1

F2 - Acquisition Parameters  
Date\_ 20200907  
Time\_ 14.01  
INSTRUM spect  
PROBHD 5 mm PABBO BB/  
PULPROG zg30  
TD 65536  
SOLVENT DMSO  
NS 32  
DS 2  
SWH 8012.820 Hz  
FIDRES 0.122266 Hz  
AQ 4.0894465 sec  
RG 106.37  
DW 62.400 usec  
DE 6.50 usec  
TE 298.0 K  
D1 1.00000000 sec  
TD0 1

----- CHANNEL f1 -----  
SFO1 400.1924713 MHz  
NUC1 1H  
P1 15.00 usec  
PLW1 10.39999962 W

F2 - Processing parameters  
SI 65536  
SF 400.1900000 MHz  
WDW EM  
SSB 0  
LB 0.30 Hz  
GB 0  
PC 1.00

10.5204  
10.4032  
7.7830  
7.6671  
7.6251  
7.6170  
7.6050  
7.5944  
7.5896  
7.5828  
7.5690  
7.4963  
7.4761  
7.3767  
7.3655  
7.3454  
7.1837  
7.1615  
7.1510  
7.1394  
7.1286  
7.1062  
4.7526  
4.5827  
4.2197  
3.3634  
2.5144  
2.5102  
2.5060  
2.3634  
2.0891

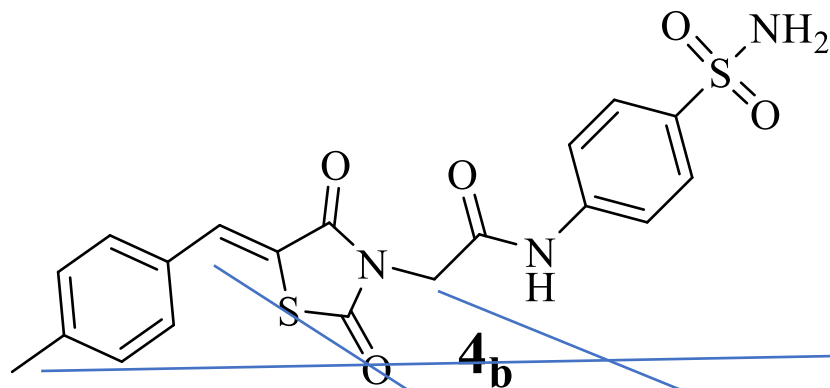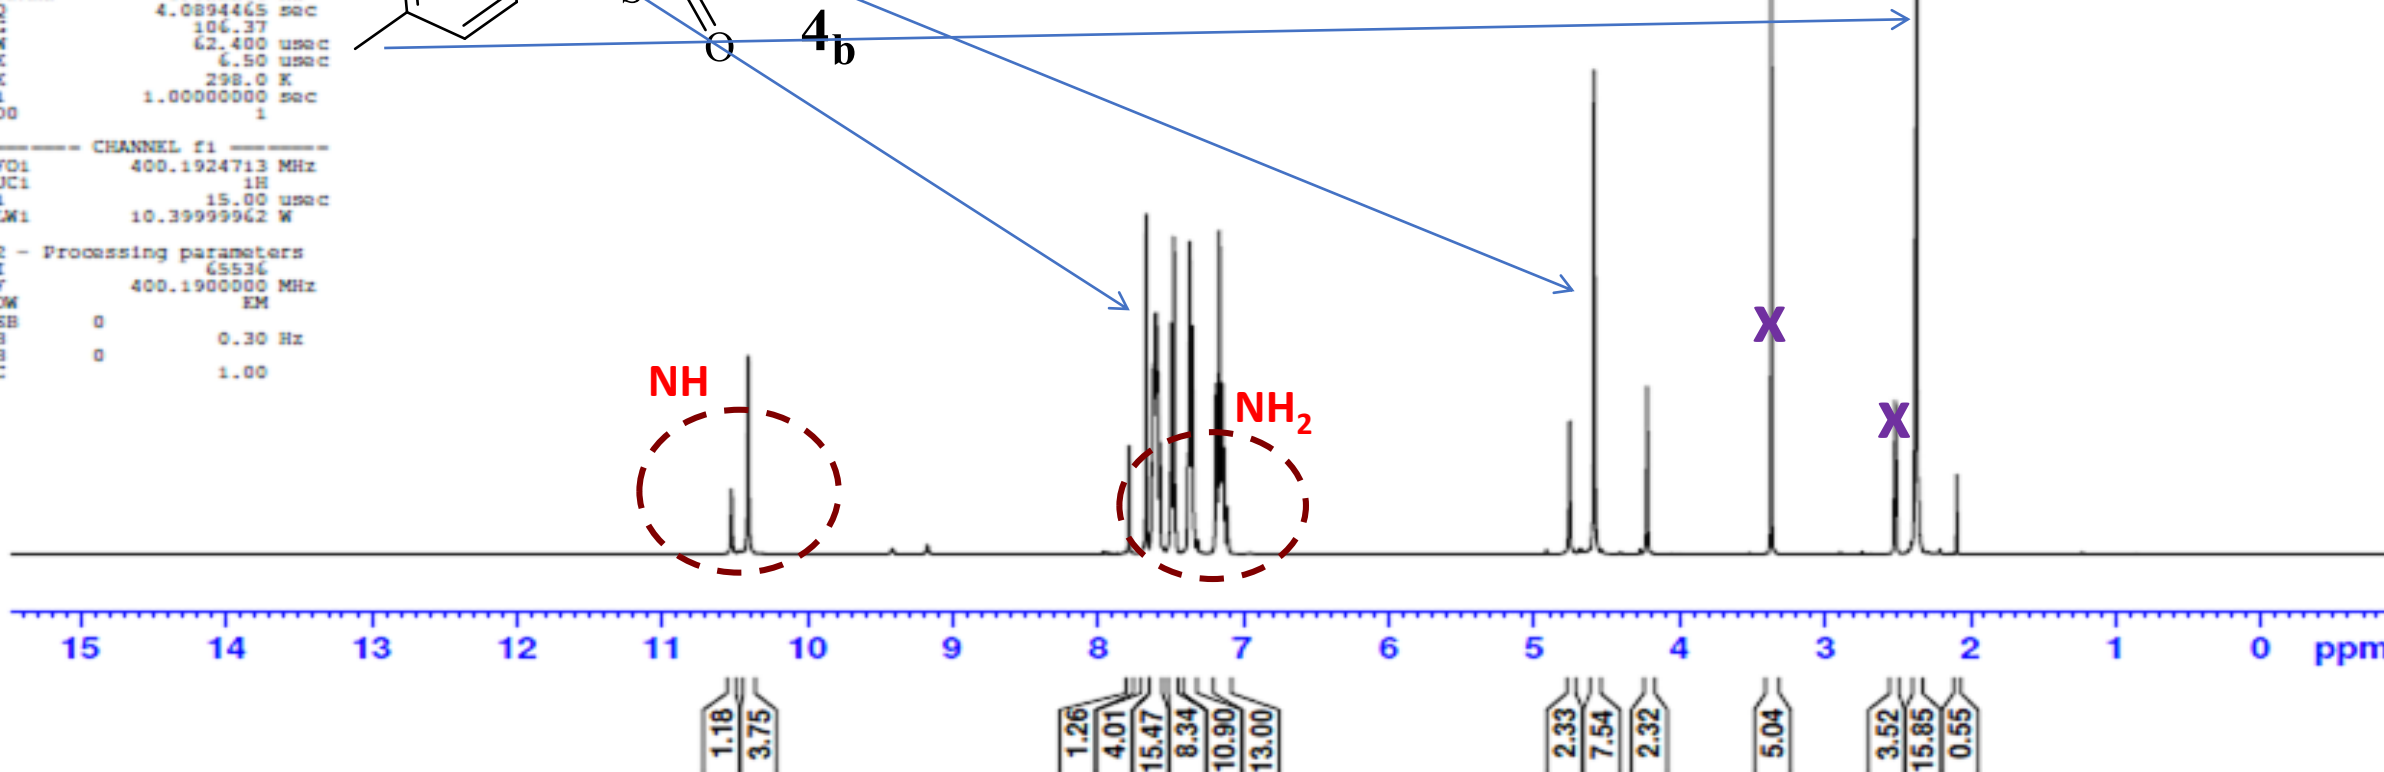



Current Data Parameters  
NAME Kaled ElAdl\_H\_3\_D2O  
EXPNO 10  
PROCNO 1

F2 - Acquisition Parameters  
Date\_ 20201012  
Time 13.38  
INSTRUM spect  
PROBHD 5 mm PABBO BB/  
PULPROG zg30  
TD 65536  
SOLVENT DMSO  
NS 32  
DS 2  
SWH 8012.820 Hz  
FIDRES 0.122264 Hz  
AQ 4.0894465 sec  
RG 32.12  
DM 62.400 usec  
DE 6.50 usec  
TE 298.0 K  
D1 1.00000000 sec  
TD0 1

----- CHANNEL f1 -----  
SFO1 400.1924713 MHz  
NUC1 1H  
P1 15.00 usec  
PLW1 10.39999962 W

F2 - Processing parameters  
SI 65536  
SF 400.1900000 MHz  
WDW EM  
SSB 0  
LB 0.30 Hz  
GB 0  
PC 1.00

D<sub>2</sub>O

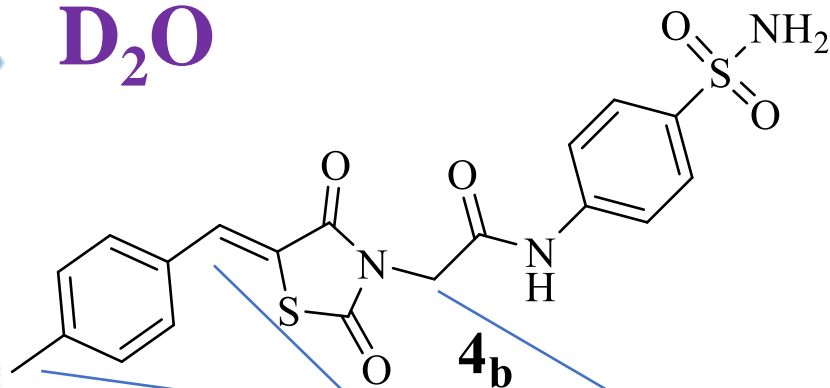

7.6565  
7.5711  
7.5196  
7.5130  
7.5034  
7.4912  
7.4529  
7.4337  
7.3971  
7.3772  
7.2922  
7.2726  
7.1176  
7.0957  
7.0734  
7.0415  
7.0168  
6.9948  
4.5427  
4.0481  
2.5115  
2.2906

4b

NH

NH<sub>2</sub>

15 14 13 12 11 10 9 8 7 6 5 4 3 2 1 0 ppm

1.19  
3.32  
4.19  
2.75

1.68  
83.48

0.85  
3.39

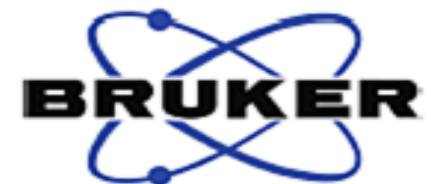

Current Data Parameters  
NAME KE-H  
EXPNO 2  
PROCNO 1

F2 - Acquisition Parameters  
Date\_ 20200817  
Time 11.07  
INSTRUM spect  
PROBHD 5 mm PABBO BB/  
PULPROG zg30  
TD 65536  
SOLVENT DMSO  
NS 34  
DS 2  
SWH 8012.820 Hz  
FIDRES 0.122266 Hz  
AQ 4.0894465 sec  
RG 126.31  
DW 62.400 usec  
DE 6.50 usec  
TE 300.0 K  
D1 1.00000000 sec  
TD0 1

----- CHANNEL f1 -----  
SFO1 400.1524711 MHz  
NUC1 1H  
P1 12.00 usec  
PLW1 18.00000000 W

F2 - Processing parameters  
SI 65536  
SF 400.1500000 MHz  
WDW EM  
SSB 0  
LB 0.30 Hz  
GB 0  
PC 1.00

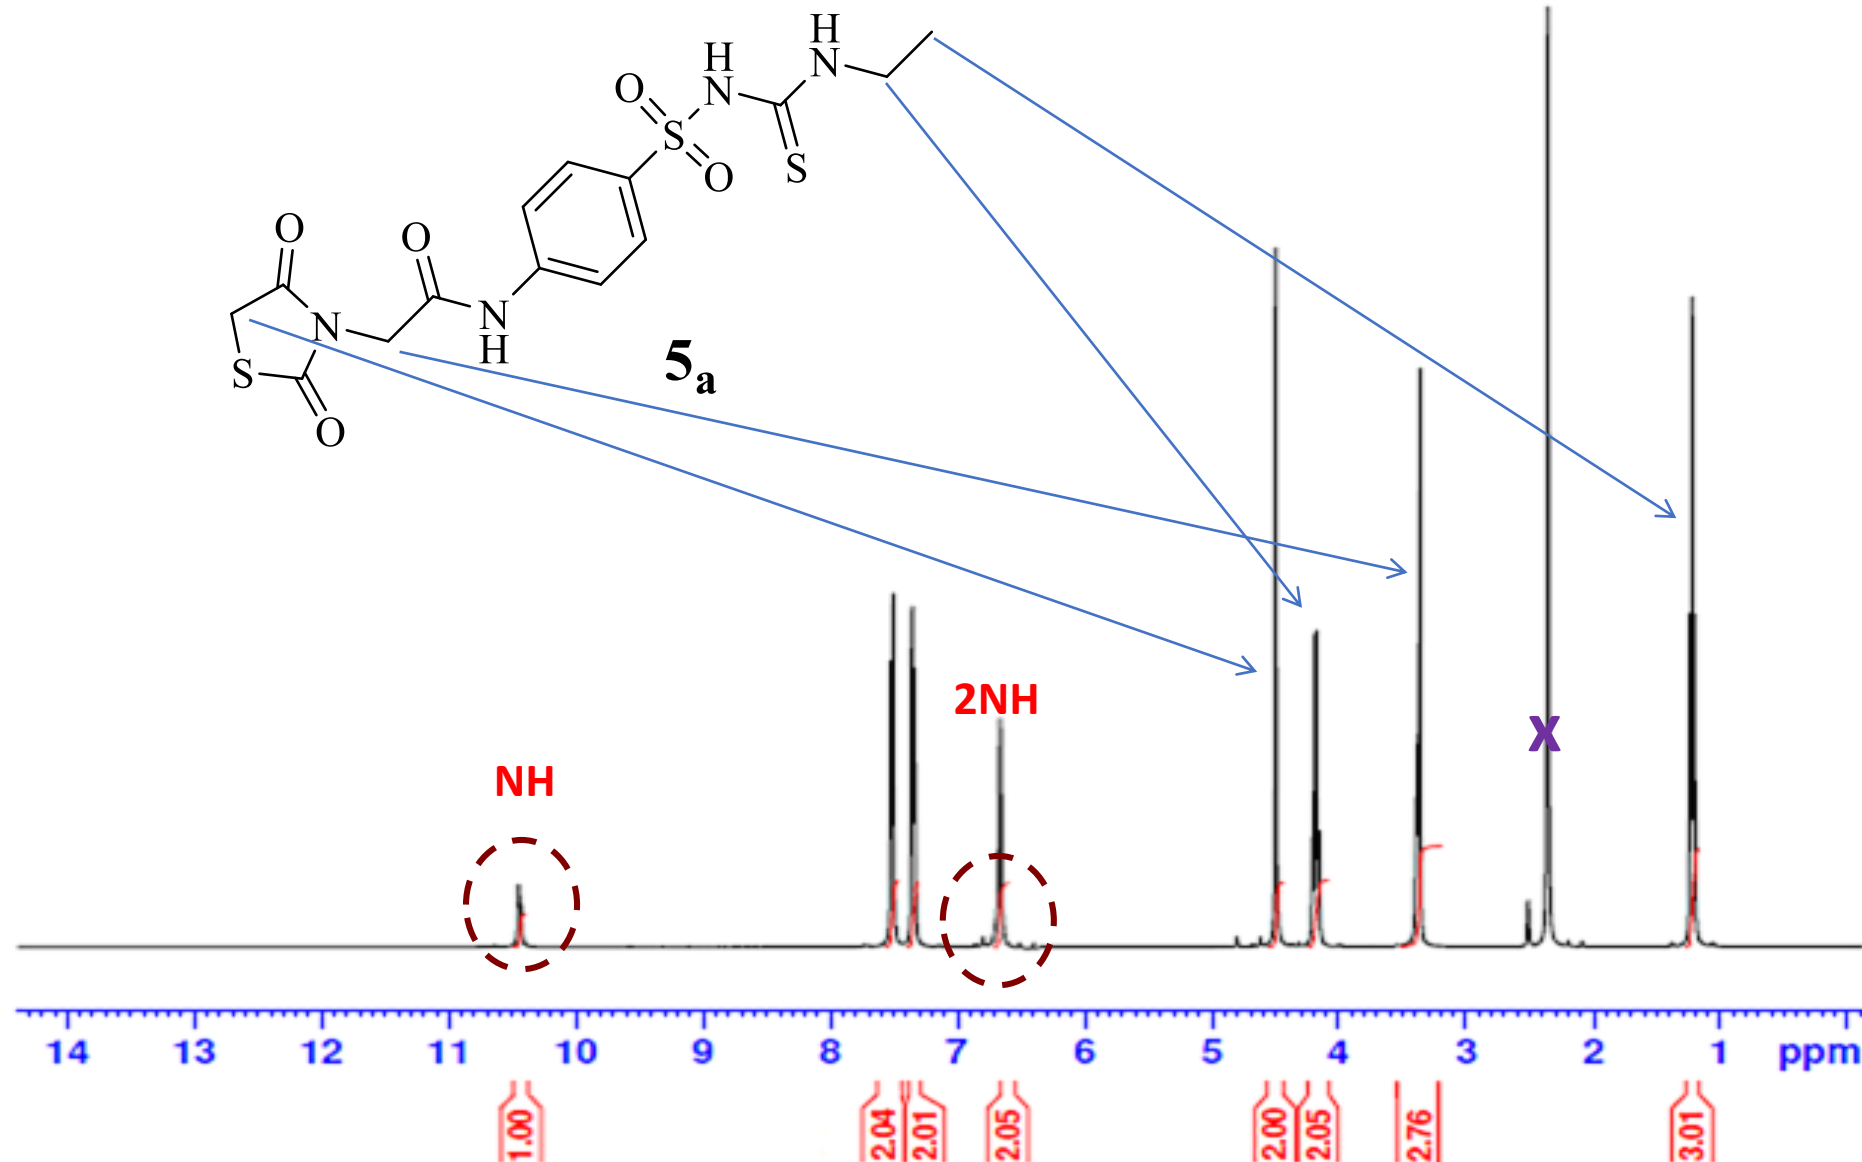

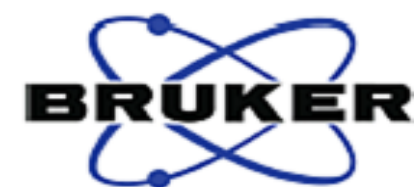

Current Data Parameters  
NAME KE-H-d2o  
EXPNO 1  
PROCNO 1

F2 - Acquisition Parameters  
Date\_ 20200818  
Time 8.29  
INSTRUM spect  
PROBHD 5 mm PABBO BB/  
PULPROG zg30  
TD 65536  
SOLVENT DMSO  
NS 37  
DS 2  
SWH 8012.820 Hz  
FIDRES 0.122266 Hz  
AQ 4.0894465 sec  
RG 205.37  
DW 62.400 usec  
DE 6.50 usec  
TE 300.0 K  
D1 1.00000000 sec  
TD0 1

----- CHANNEL f1 -----  
SFO1 400.1524711 MHz  
NUC1 1H  
P1 12.00 usec  
PLW1 18.00000000 W

F2 - Processing parameters  
SI 65536  
SF 400.1500000 MHz  
WDW EM  
SSB 0  
LB 0.30 Hz  
GB 0  
PC 1.00

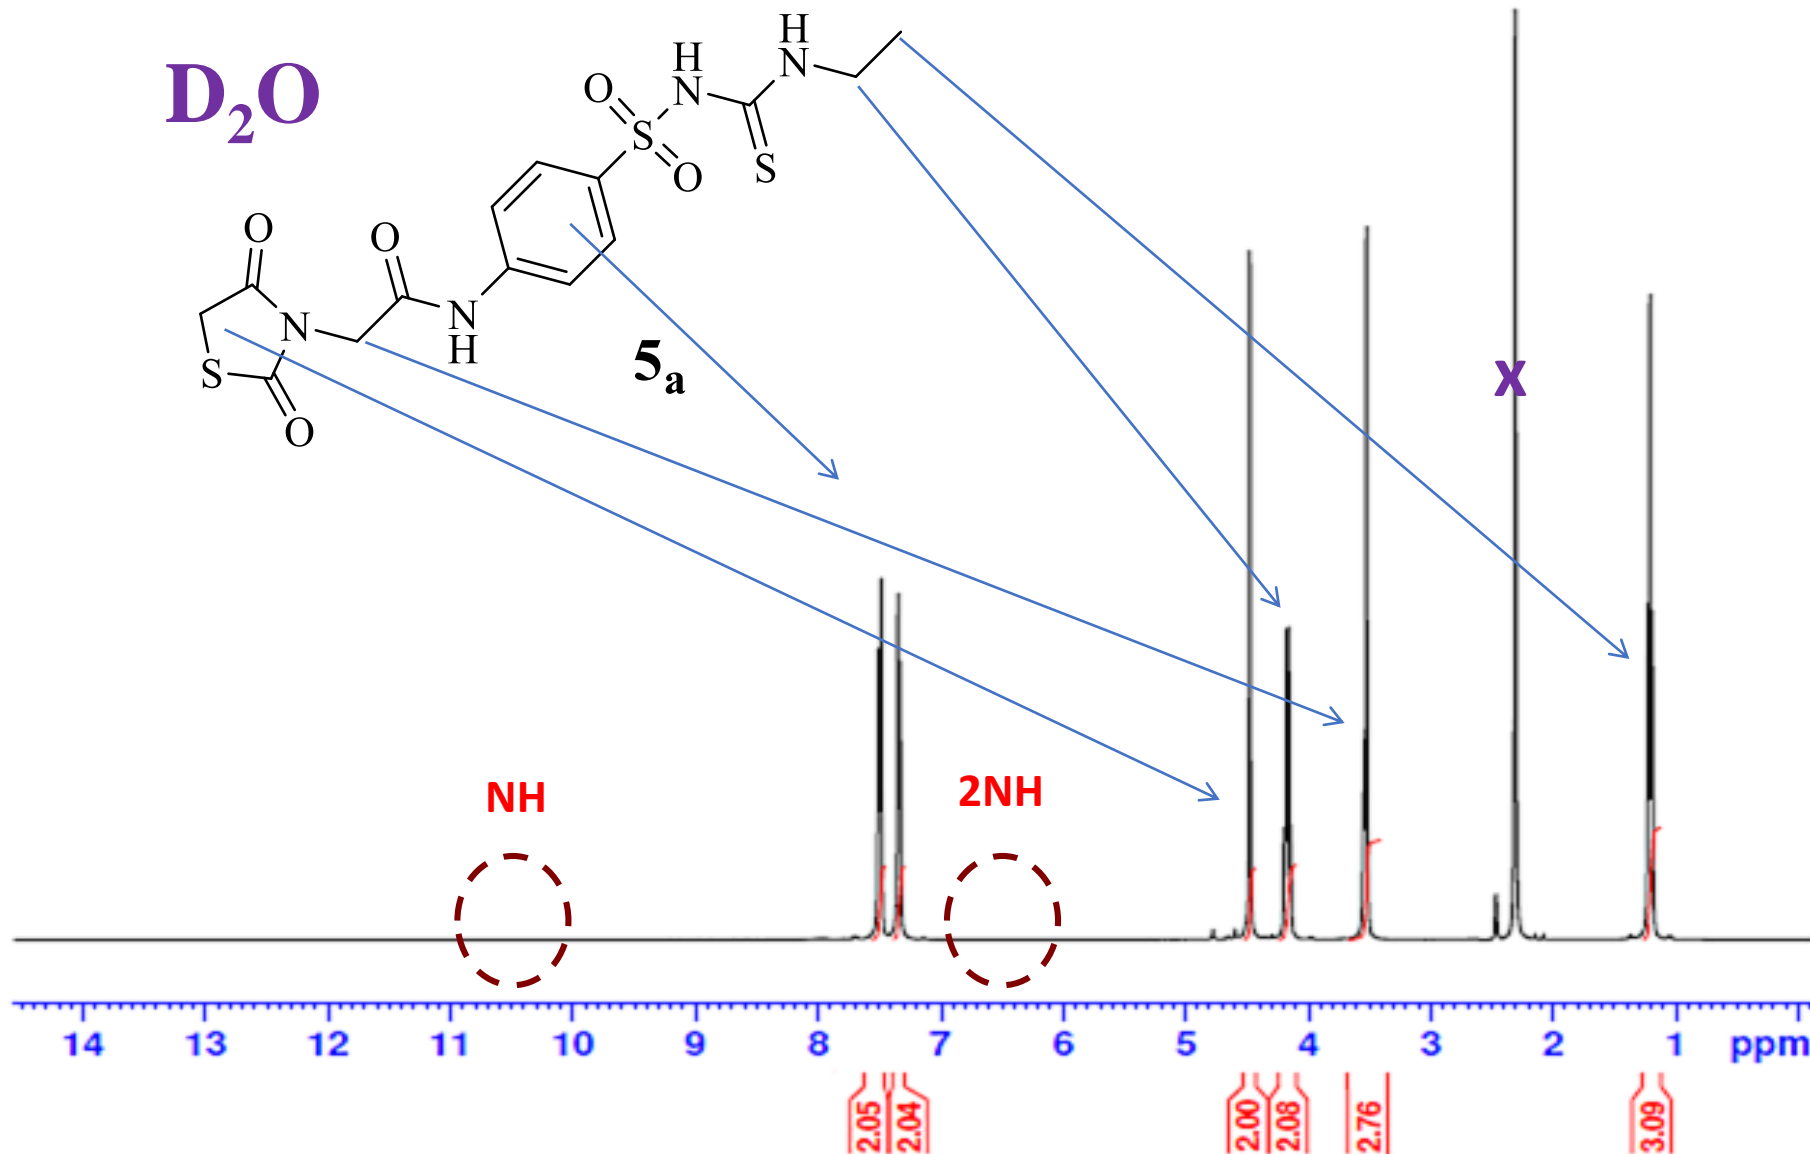



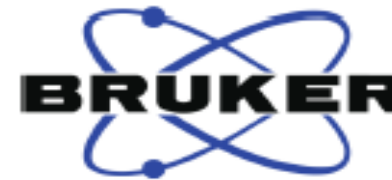

Current Data Parameters  
NAME KE-H  
EXPNO 3  
PROCNO 1

F2 - Acquisition Parameters

Date\_ 20200921  
Time 9.49  
INSTRUM spect  
PROBHD 5 mm PABBO BB/  
PULPROG zgpg30  
ID 65536  
SOLVENT DMSO  
NS 500  
DS 4  
SWH 24038.461 Hz  
FIDRES 0.366798 Hz  
AQ 1.3631488 sec  
RG 205.37  
DW 20.800 usec  
DE 6.50 usec  
TE 300.0 K  
D1 2.00000000 sec  
D11 0.03000000 sec  
TD0 1

----- CHANNEL f1 -----  
SFO1 100.6278588 MHz  
NUC1 13C  
P1 10.00 usec  
PLW1 47.00000000 W

----- CHANNEL f2 -----  
SFO2 400.1516006 MHz  
NUC2 1H  
CPDPRG[2] waltz16  
PCPD2 90.00 usec  
PLW2 18.00000000 W  
PLW12 0.34722000 W  
PLW13 0.28125000 W

F2 - Processing parameters  
SI 32768  
SF 100.6177975 MHz  
WDW EM  
SSB 0  
LB 1.00 Hz  
GB 0  
PC 1.40

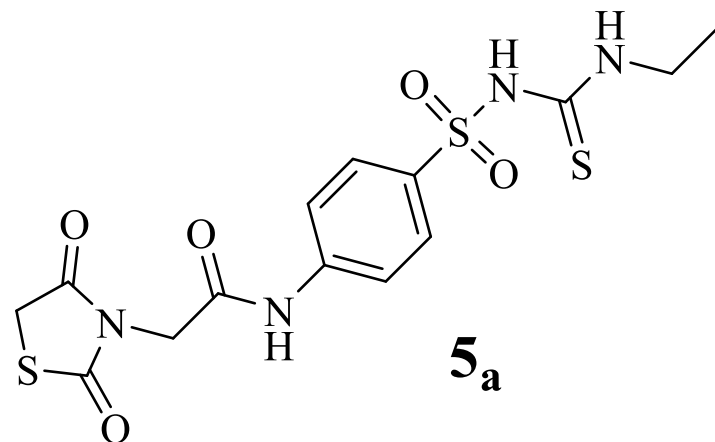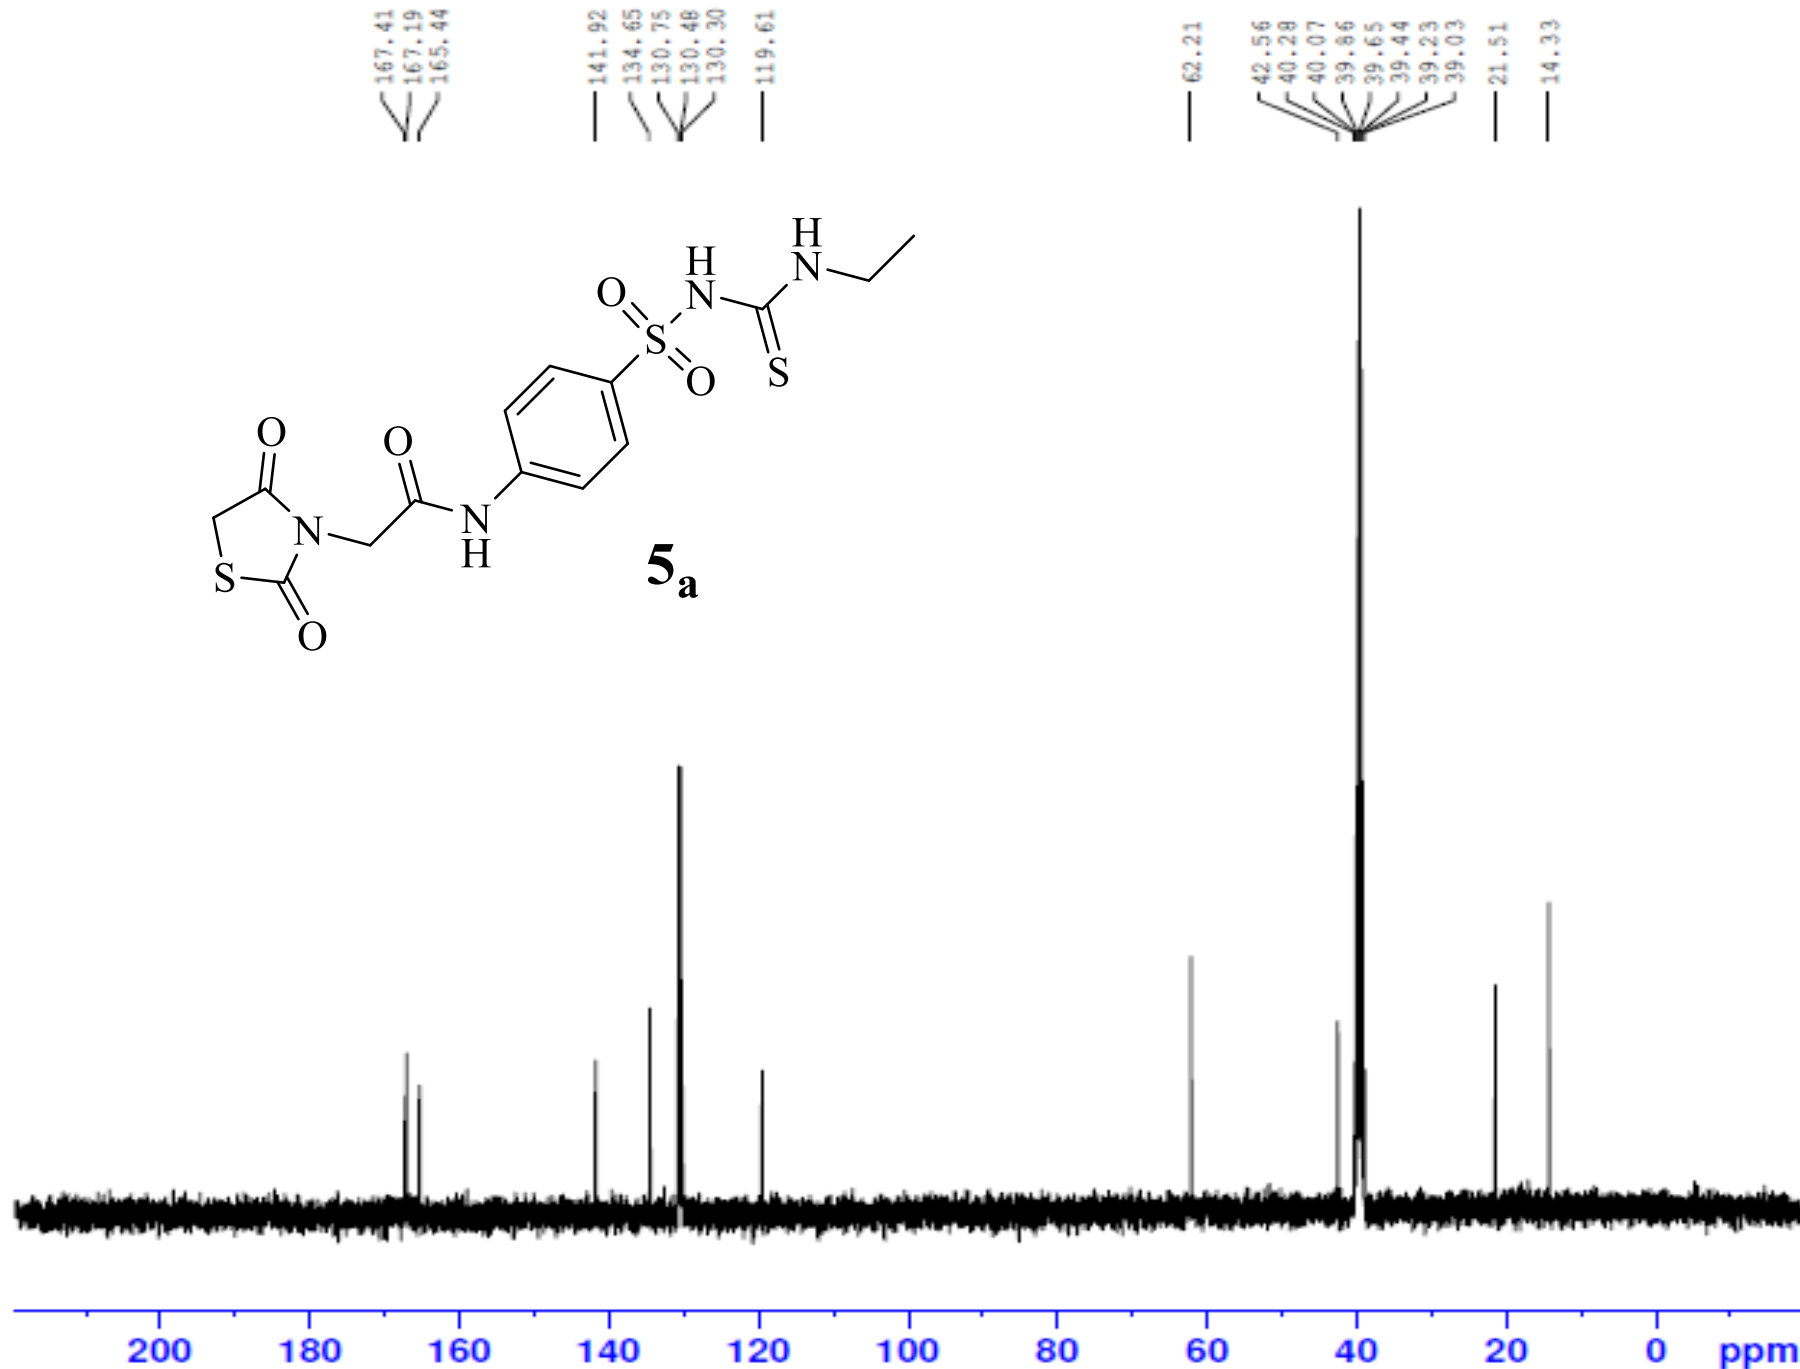

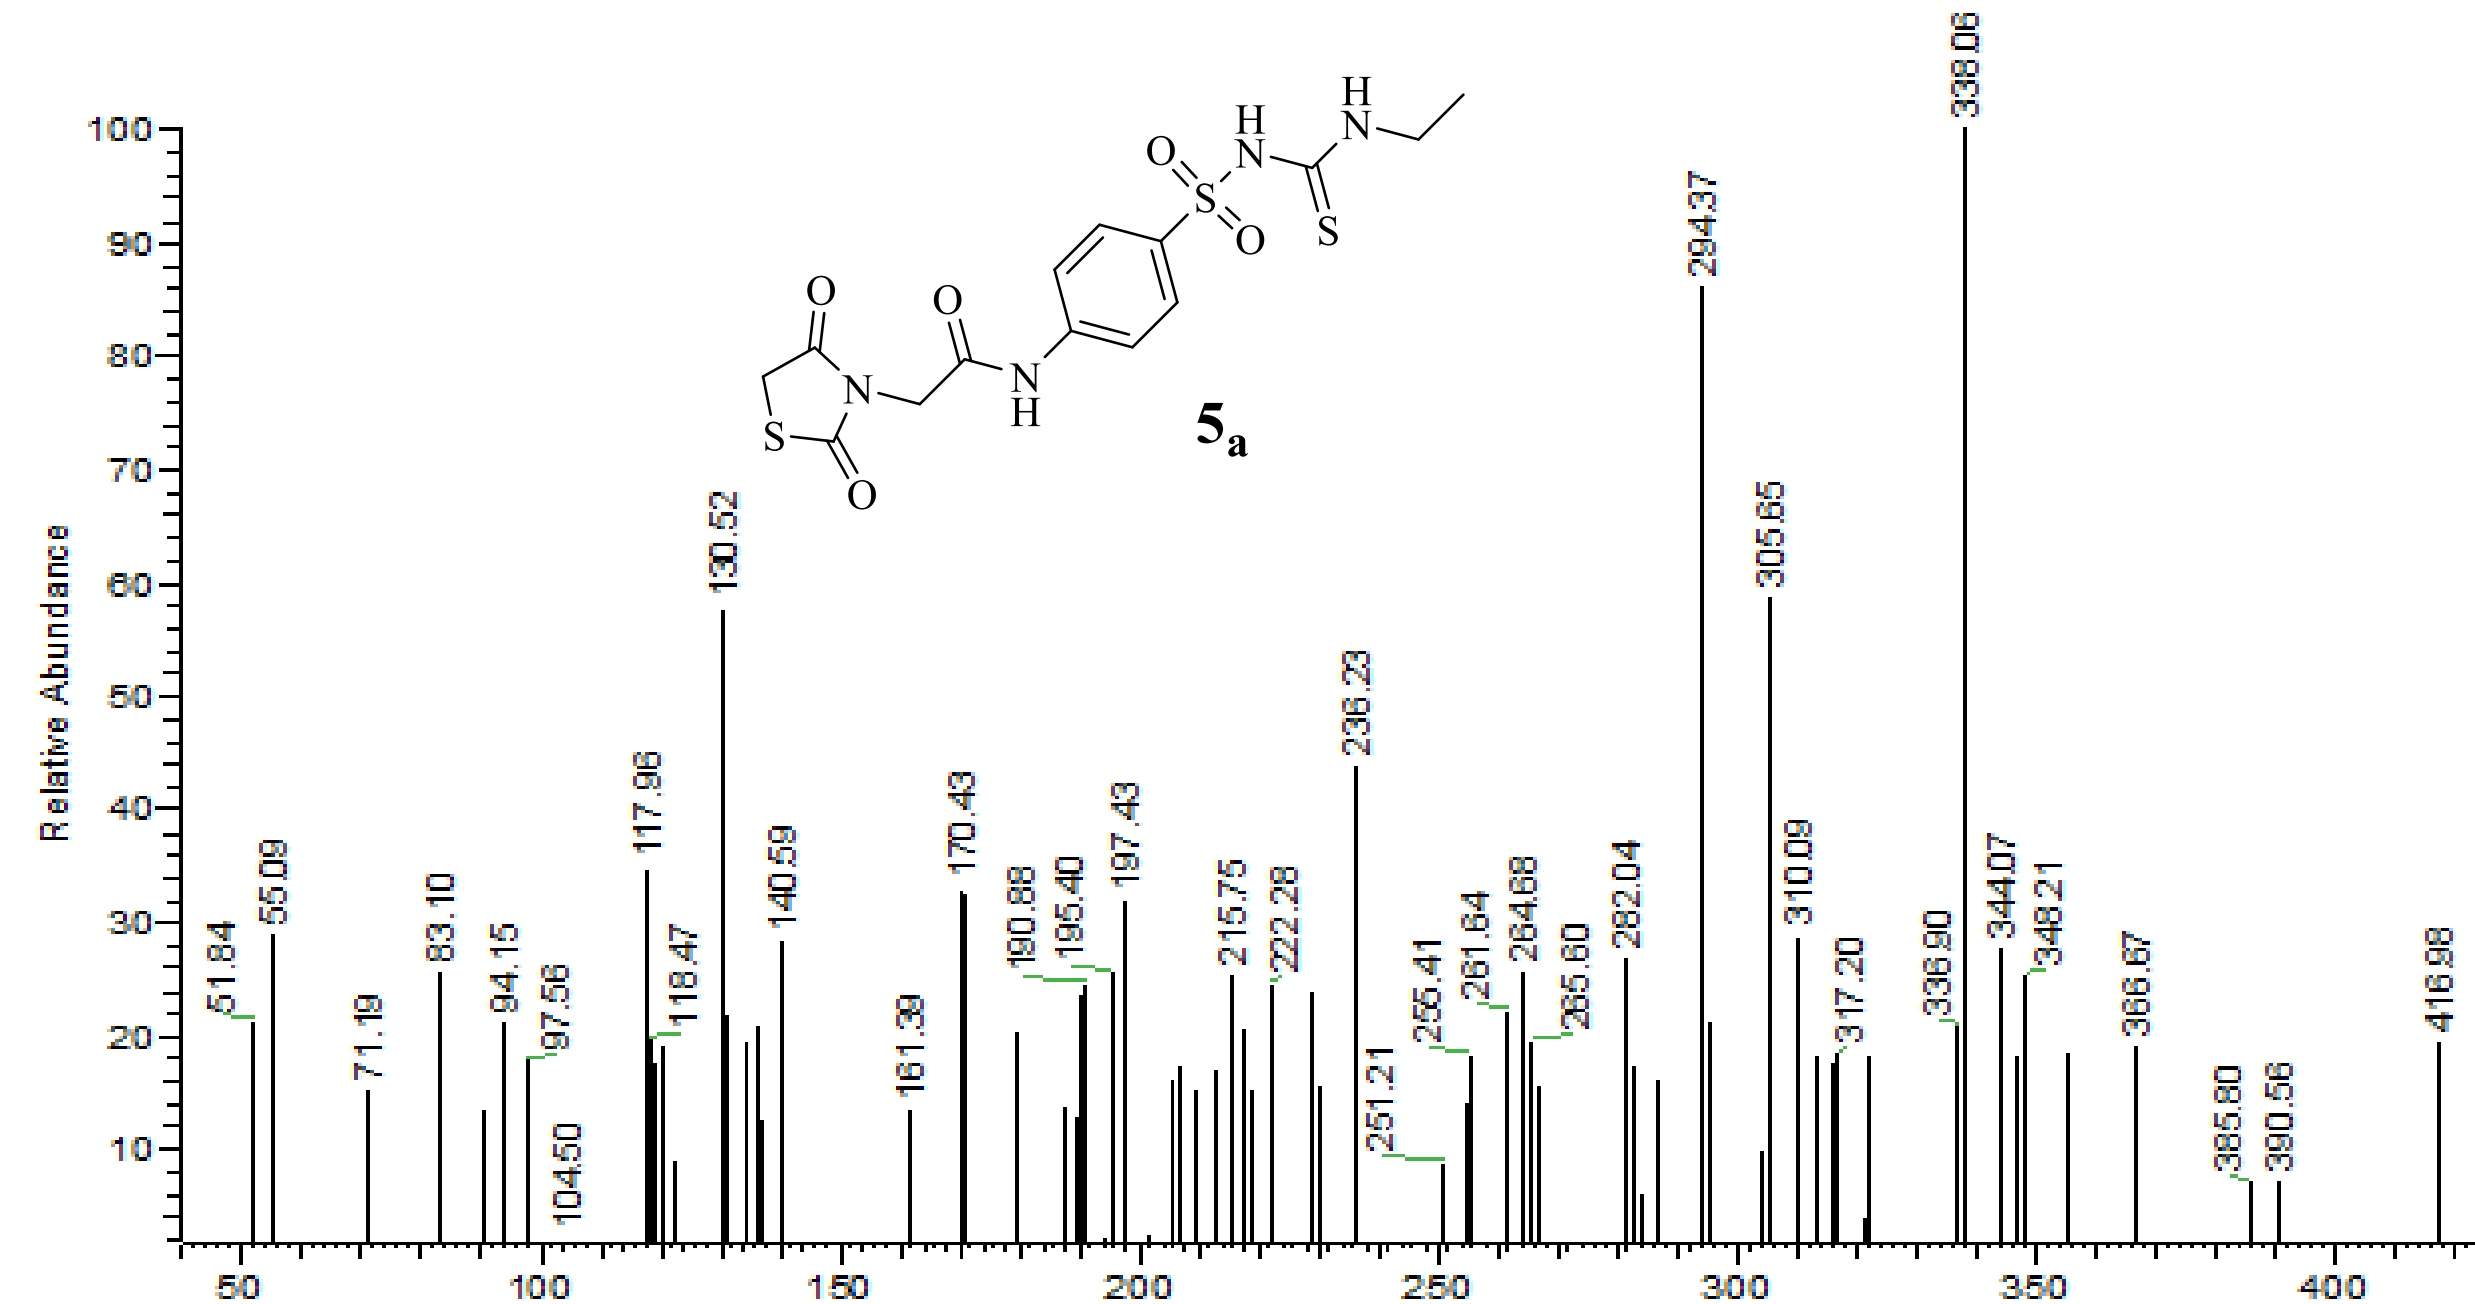

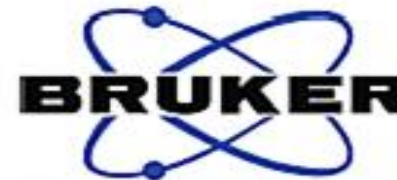

Current Data Parameters  
NAME KE-K  
EXPNO 1  
PROCNO 1

F2 - Acquisition Parameters  
Date\_ 20200817  
Time 11.15  
INSTRUM spect  
PROBHD 5 mm PABBO BB/  
PULPROG zg30  
TD 65536  
SOLVENT DMSO  
NS 48  
DS 2  
SWH 8012.820 Hz  
FIDRES 0.122266 Hz  
AQ 4.0894465 sec  
RG 205.37  
DW 62.400 usec  
DE 6.50 usec  
TE 300.0 K  
D1 1.00000000 sec  
TDO 1

----- CHANNEL f1 -----  
SFO1 400.1524711 MHz  
NUC1 1H  
P1 12.00 usec  
PLW1 18.00000000 W

F2 - Processing parameters  
SI 65536  
SF 400.1500000 MHz  
WDW EM  
SSB 0  
LB 0.30 Hz  
GB 0  
PC 1.00

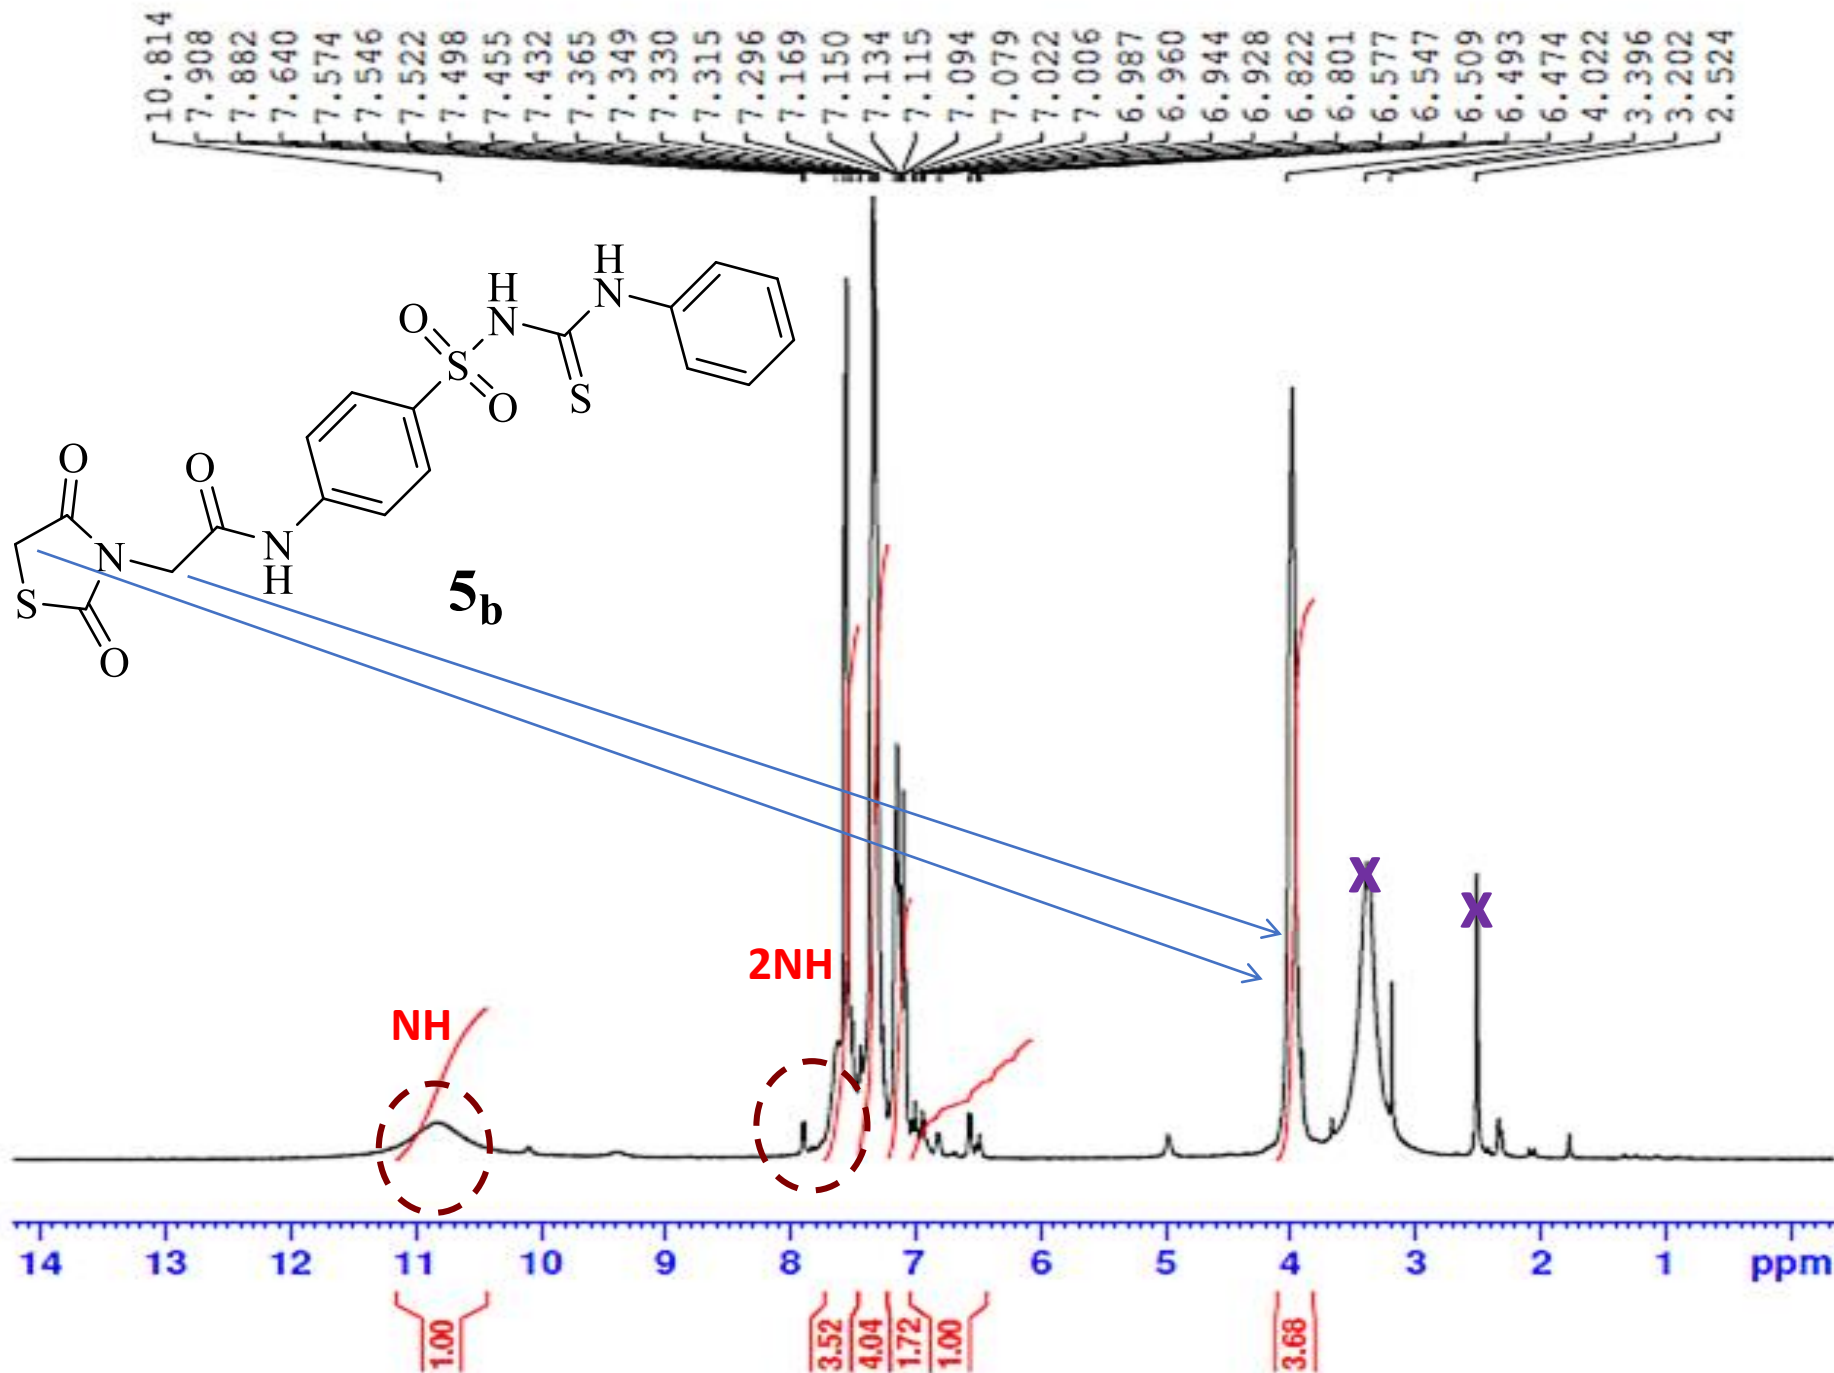

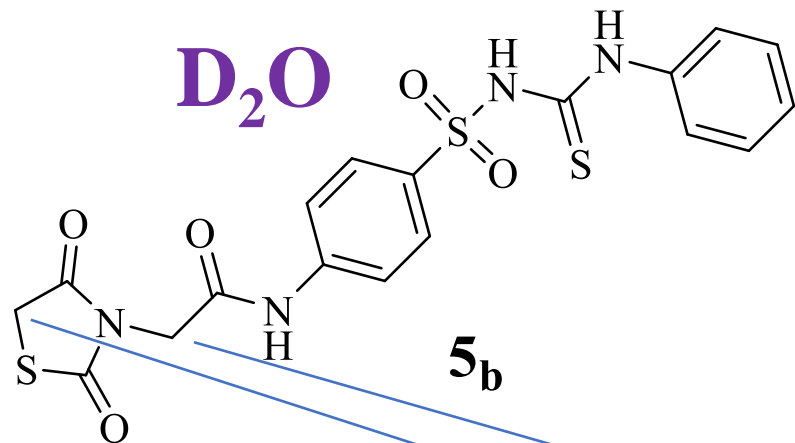

7.758  
7.734  
7.567  
7.486  
7.464  
7.427  
7.351  
7.323  
7.302  
7.290  
7.251  
7.201  
7.143  
7.116  
7.101  
7.028  
7.001  
6.983  
6.948  
6.799  
6.761  
6.586  
6.565  
6.519  
3.915  
3.625  
3.158  
2.512  
2.419  
2.390  
2.367  
2.287  
2.063  
2.029

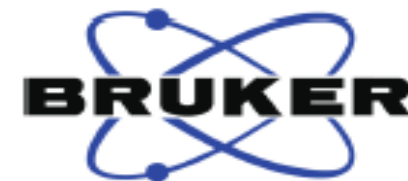

Current Data Parameters  
NAME KE-K-d2o  
EXPNO 1  
PROCNO 1

F2 - Acquisition Parameters  
Date\_ 20200818  
Time 8.50  
INSTRUM spect  
PROBHD 5 mm PABBO BB/  
PULPROG zg30  
ID 65536  
SOLVENT DMSO  
NS 34  
DS 2  
SWH 8012.820 Hz  
FIDRES 0.122266 Hz  
AQ 4.0894465 sec  
RG 205.37  
DW 62.400 usec  
DE 6.50 usec  
TE 300.0 K  
D1 1.00000000 sec  
TD0 1

----- CHANNEL f1 -----  
SFO1 400.1524711 MHz  
NUC1 1H  
P1 12.00 usec  
PLW1 18.00000000 W

F2 - Processing parameters  
SI 65536  
SF 400.1500000 MHz  
WDW EM  
SSB 0  
LB 0.30 Hz  
GB 0  
PC 1.00

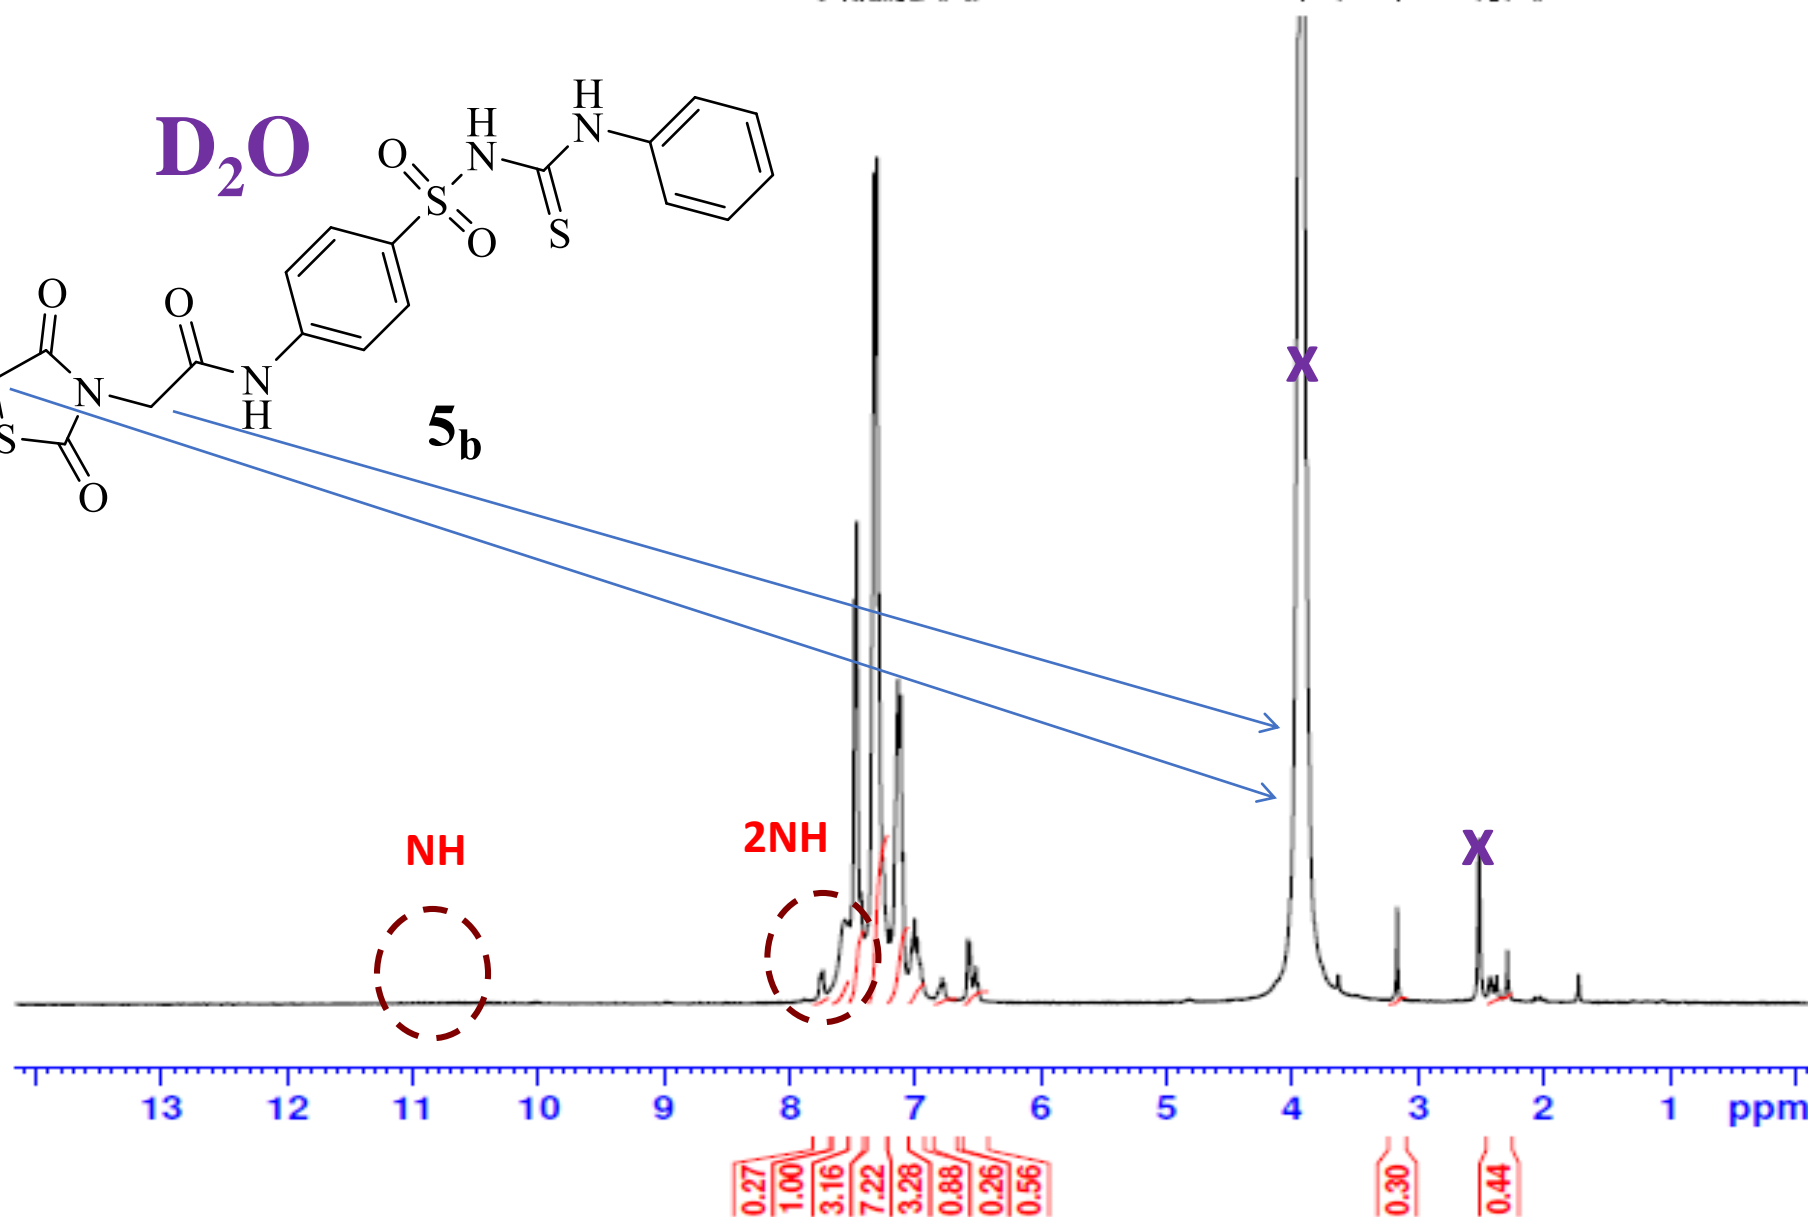

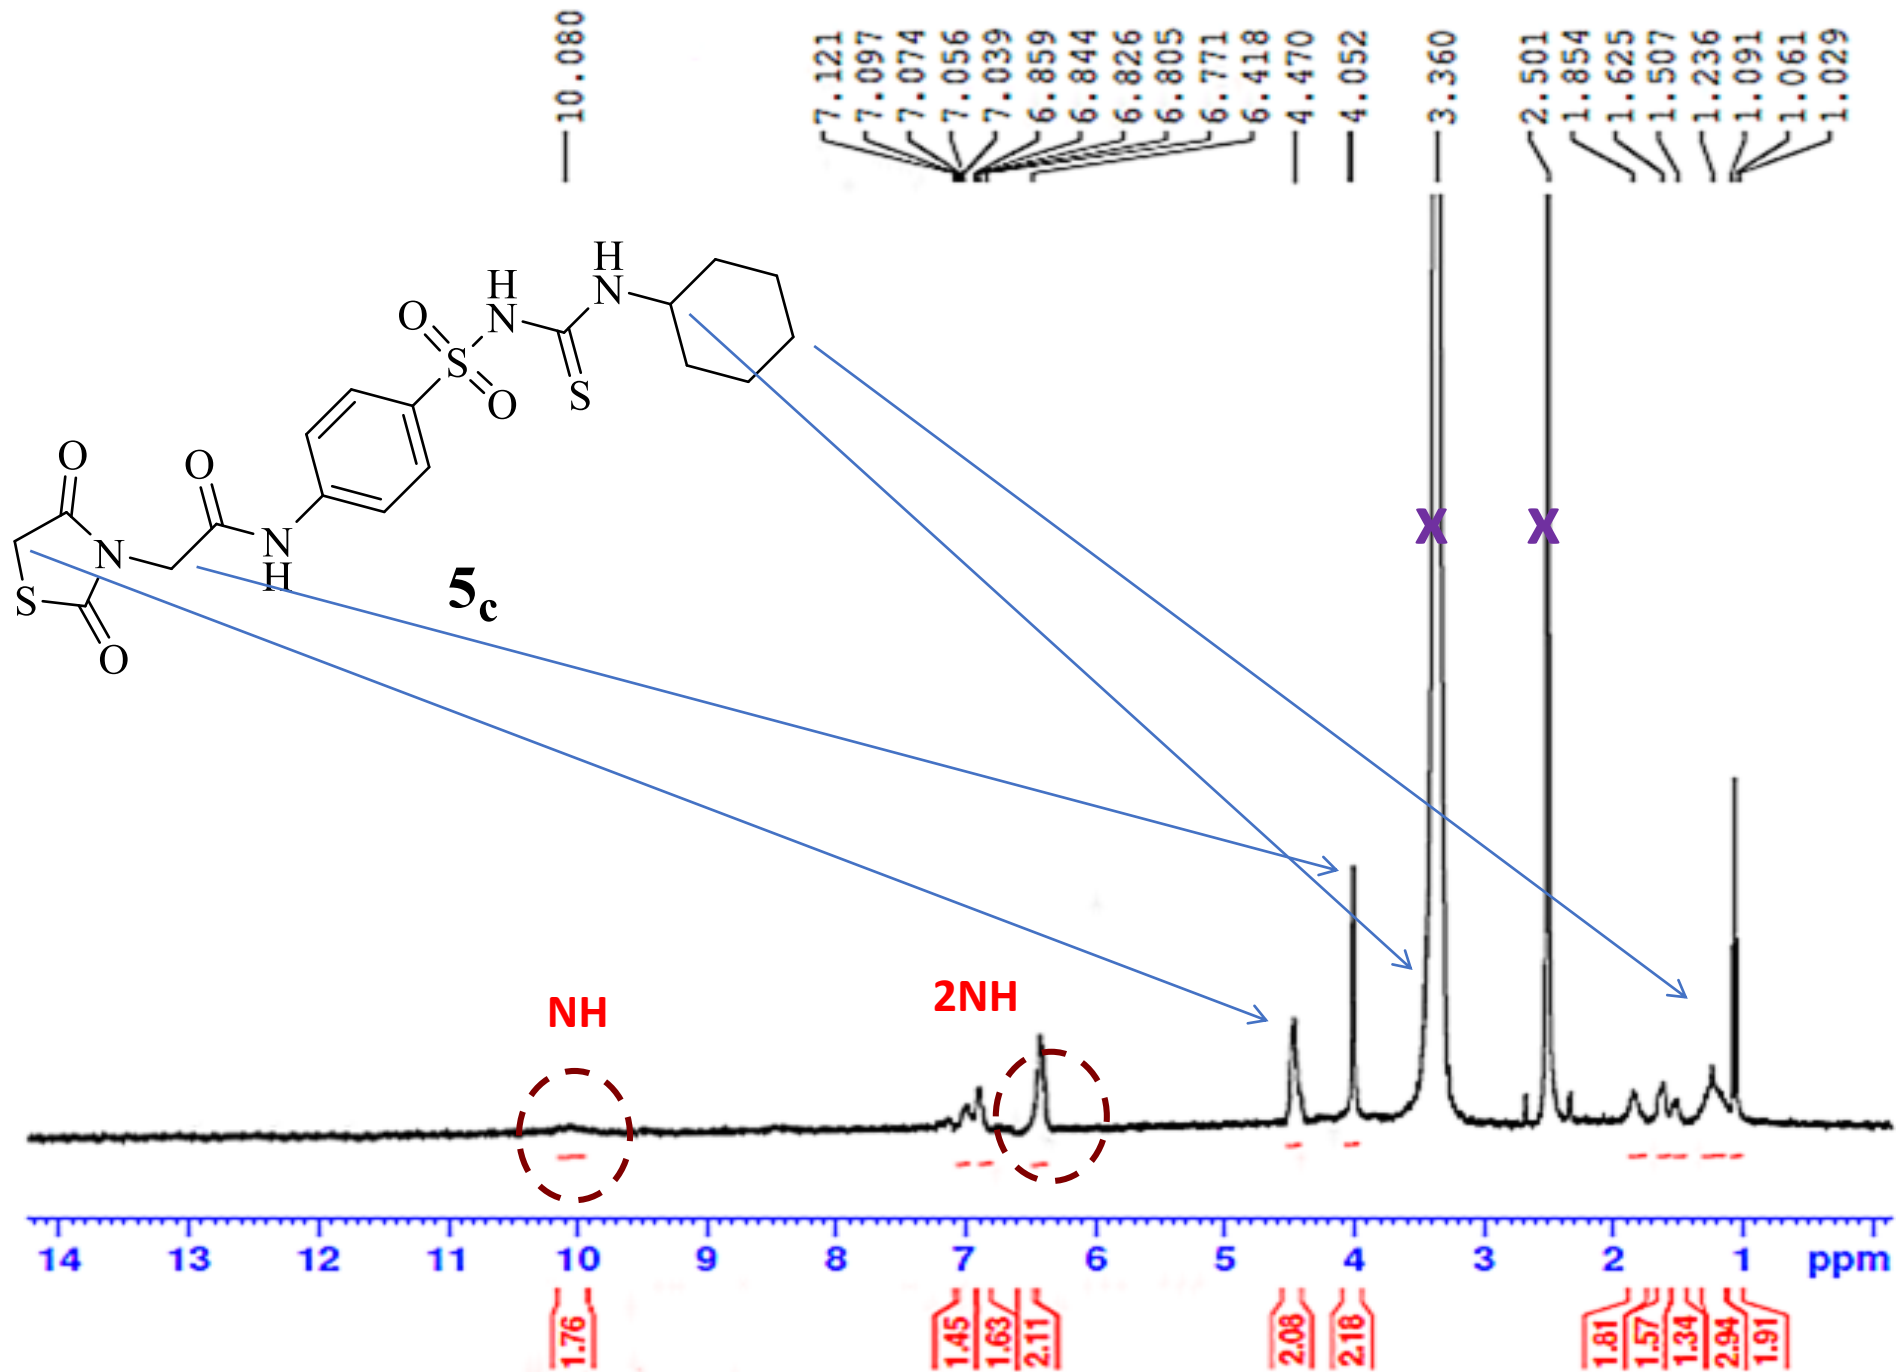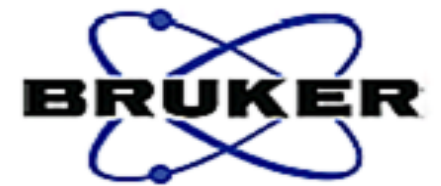

Current Data Parameters  
NAME adel-1  
EXPNO 2  
PROCNO 1

F2 - Acquisition Parameters  
Date\_ 20200426  
Time 12.36  
INSTRUM spect  
PROBHD 5 mm PABBO BB/  
PULPROG zg30  
TD 65536  
SOLVENT DMSO  
NS 128  
DS 2  
SWH 8012.820 Hz  
FIDRES 0.122266 Hz  
AQ 4.0894465 sec  
RG 205.37  
DW 62.400 usec  
DE 6.50 usec  
TE 300.0 K  
D1 1.00000000 sec  
TD0 1

----- CHANNEL f1 -----  
SFO1 400.1524711 MHz  
NUC1 1H  
P1 12.00 usec  
PLW1 18.00000000 W

F2 - Processing parameters  
SI 65536  
SF 400.1500000 MHz  
WDW EM  
SSB 0  
LB 0.30 Hz  
GB 0  
PC 1.00



D<sub>2</sub>O

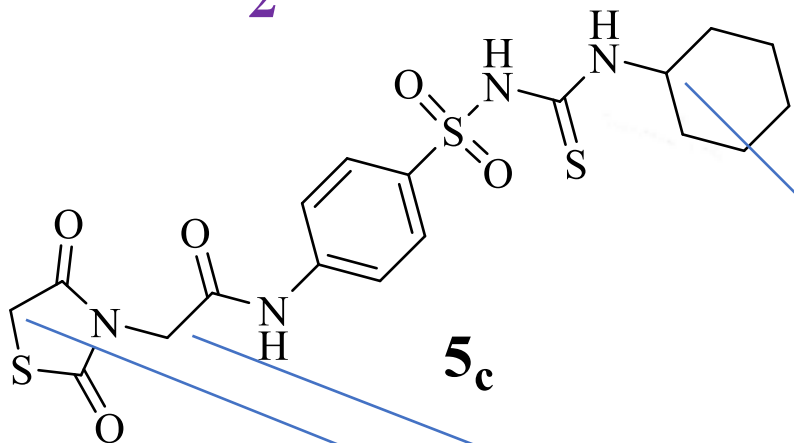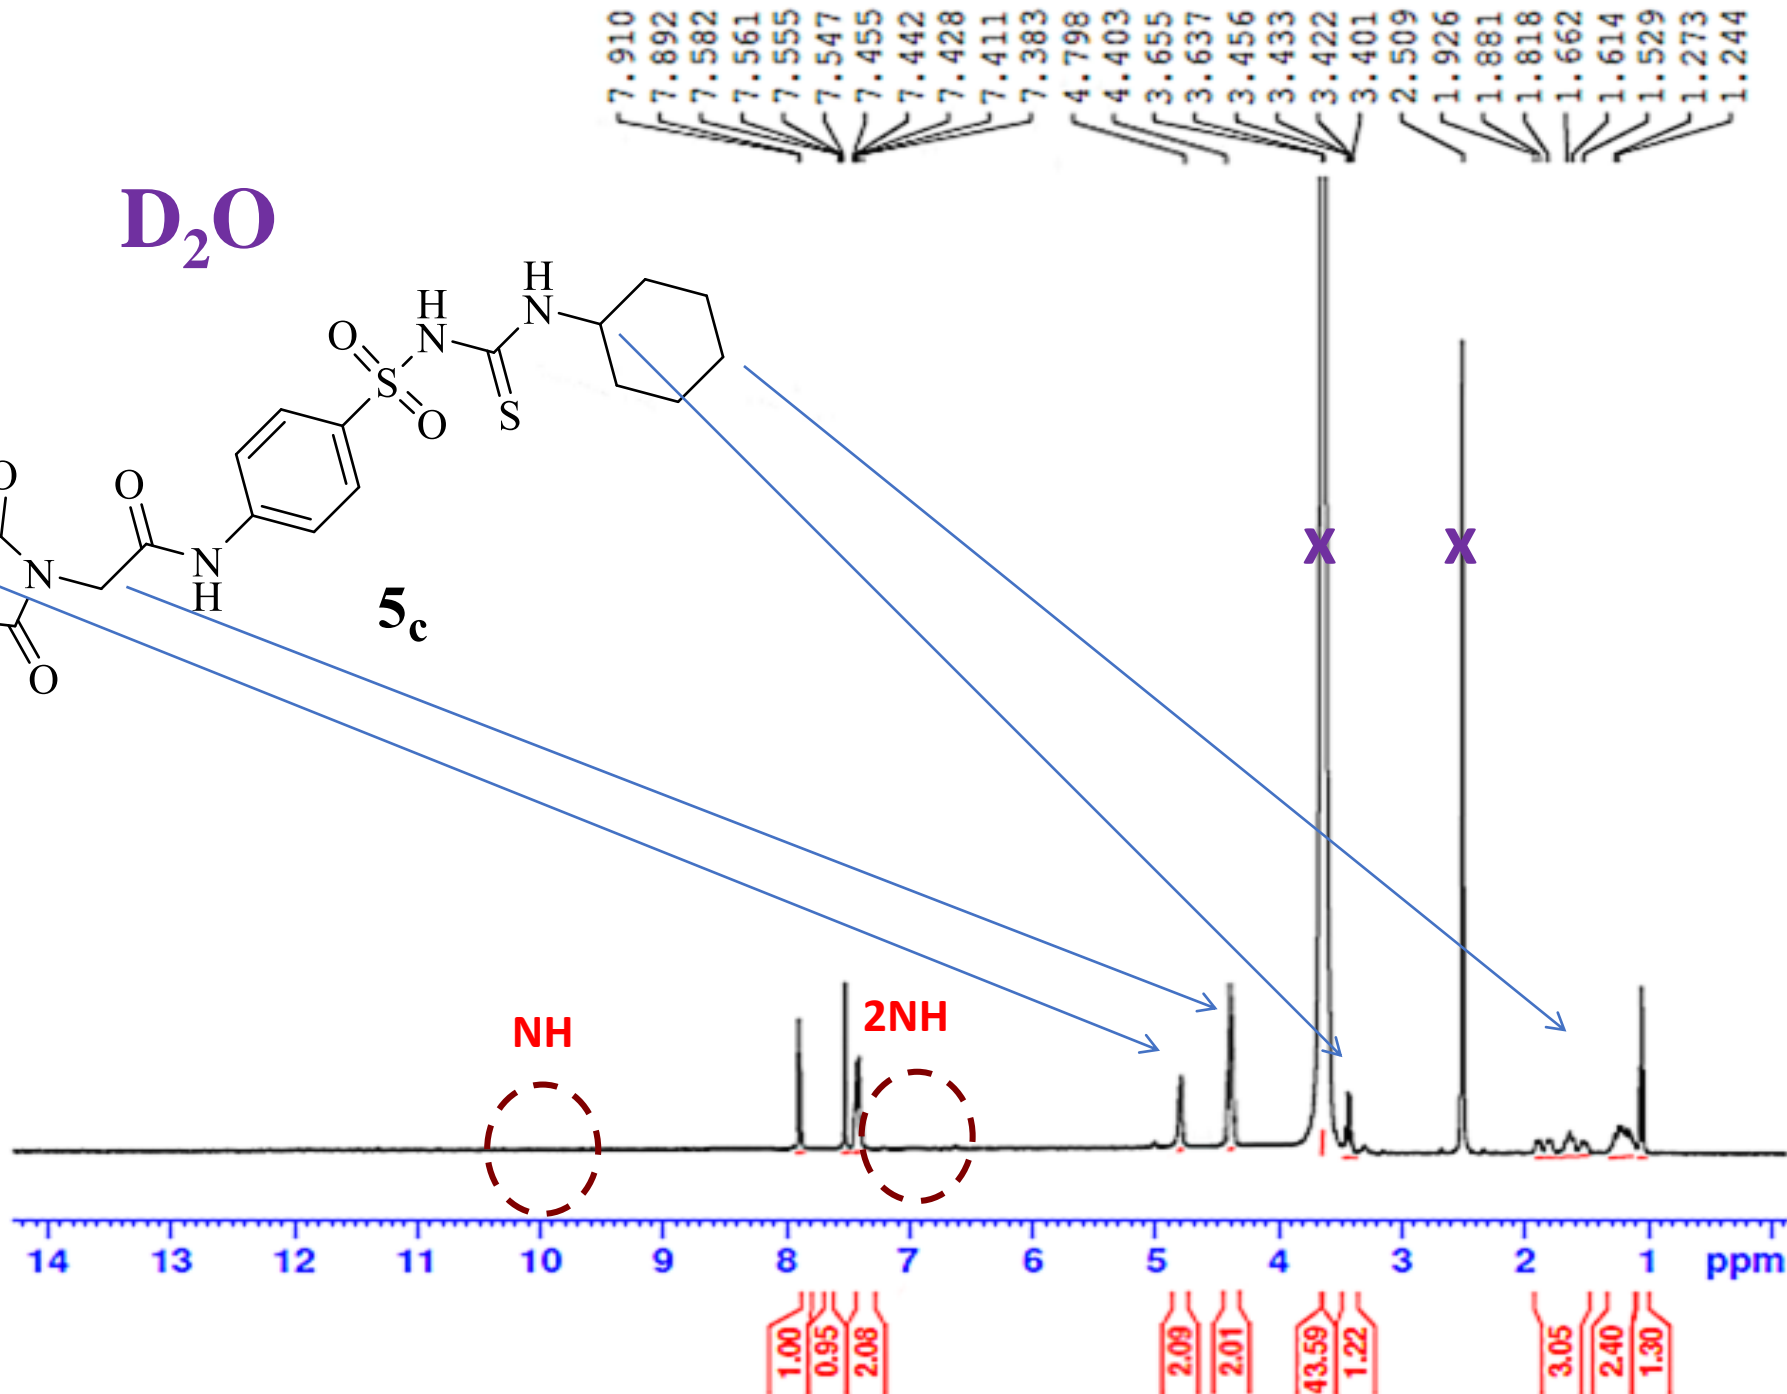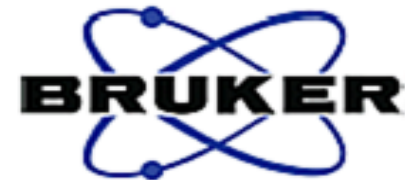

Current Data Parameters  
NAME adel-1-d2o  
EXPNO 1  
PROCNO 1

F2 - Acquisition Parameters  
Date\_ 20200513  
Time 8.50  
INSTRUM spect  
PROBHD 5 mm PABBO BB/  
PULPROG zg30  
TD 65536  
SOLVENT DMSO  
NS 58  
DS 2  
SWH 8012.820 Hz  
FIDRES 0.122266 Hz  
AQ 4.0894465 sec  
RG 205.37  
DW 62.400 usec  
DE 6.50 usec  
TE 300.0 K  
D1 1.00000000 sec  
TD0 1

----- CHANNEL f1 -----  
SFO1 400.1524711 MHz  
NUC1 1H  
P1 12.00 usec  
PLW1 18.00000000 W

F2 - Processing parameters  
SI 65536  
SF 400.1500000 MHz  
WDW EM  
SSB 0  
LB 0.30 Hz  
GB 0  
PC 1.00

khaled-aladel-b#147 RT: 2.48 AV: 1 SB: 2 3.90 , 3.90 NL: 4.00E2

T: {0,0} + cEIfull ms [40.00-1000.00]

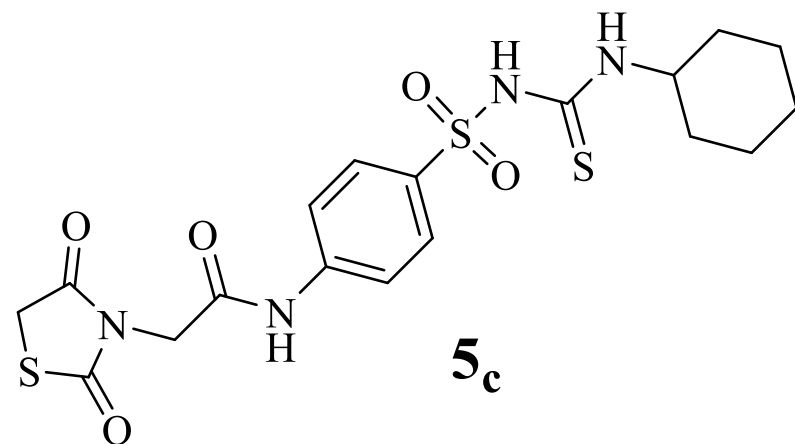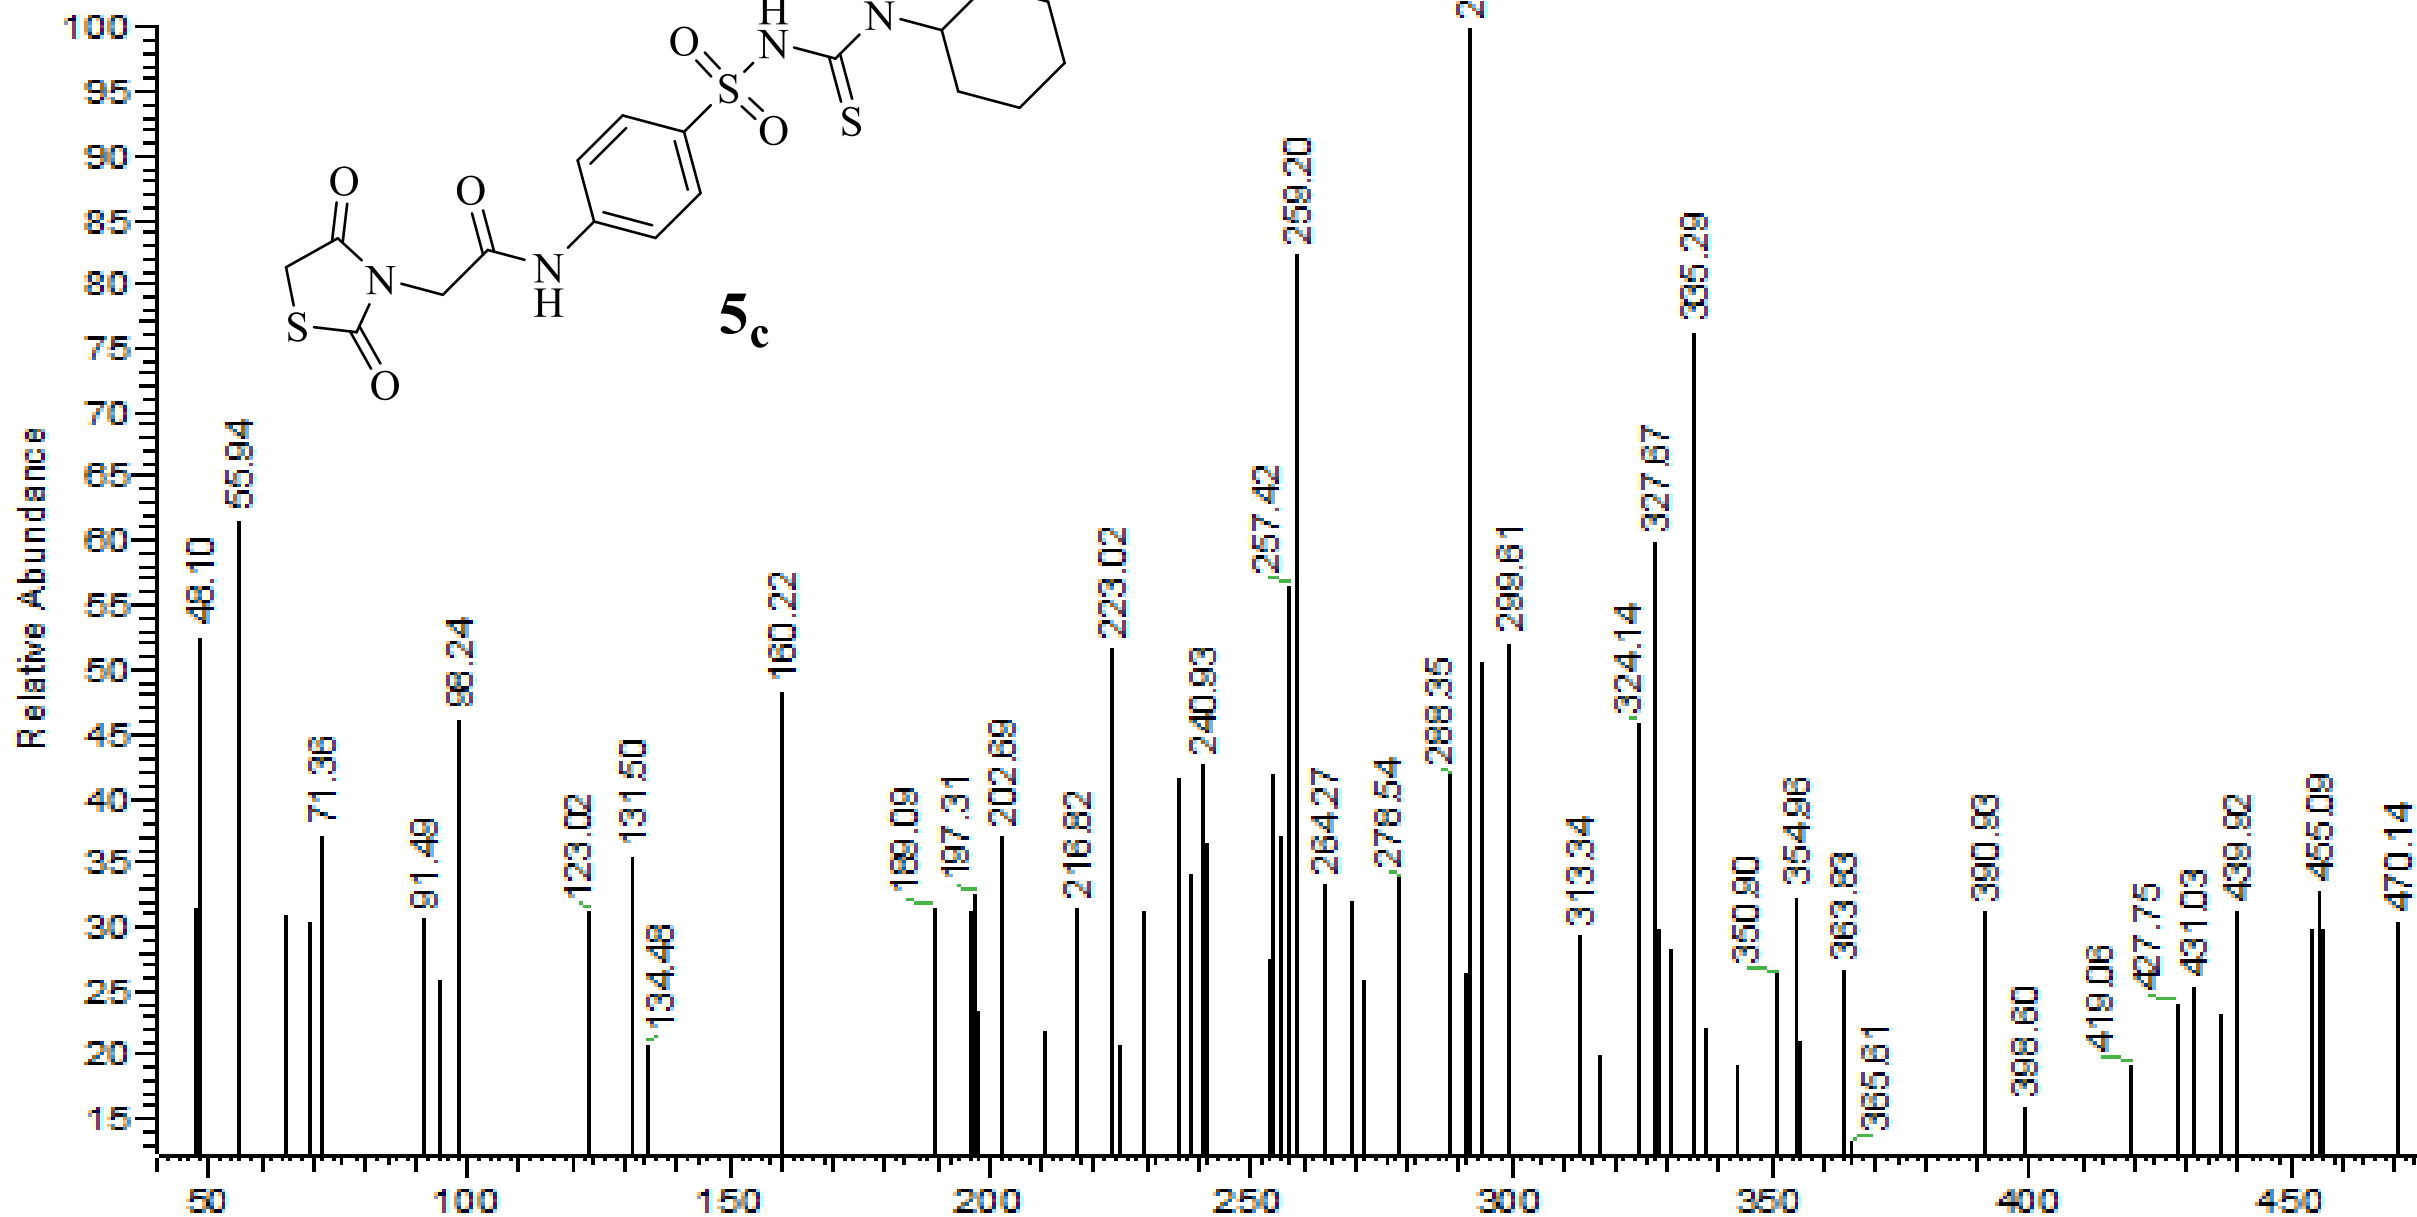

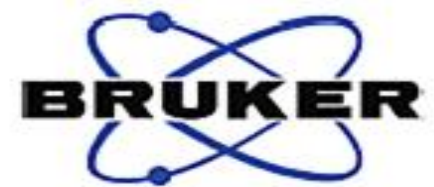

Current Data Parameters  
NAME Z  
EXPNO 1  
PROCNO 1

F2 - Acquisition Parameters  
Date\_ 20180703  
Time 9.45  
INSTRUM spect  
PROBHD 5 mm PABBO BB/  
PULPROG zg30  
TD 65536  
SOLVENT DMSO  
NS 64  
DS 2  
SWH 8012.820 Hz  
FIDRES 0.122266 Hz  
AQ 4.0894465 sec  
RG 205.37  
DW 62.400 usec  
DE 6.50 usec  
TE 298.0 K  
D1 1.00000000 sec  
TD0 1

----- CHANNEL f1 -----  
SFO1 400.1524711 MHz  
NUC1 1H  
P1 12.00 usec  
PLW1 18.00000000 W

F2 - Processing parameters  
SI 65536  
SF 400.1500000 MHz  
WDW EM  
SSB 0  
LB 0.30 Hz  
GB 0  
PC 1.00

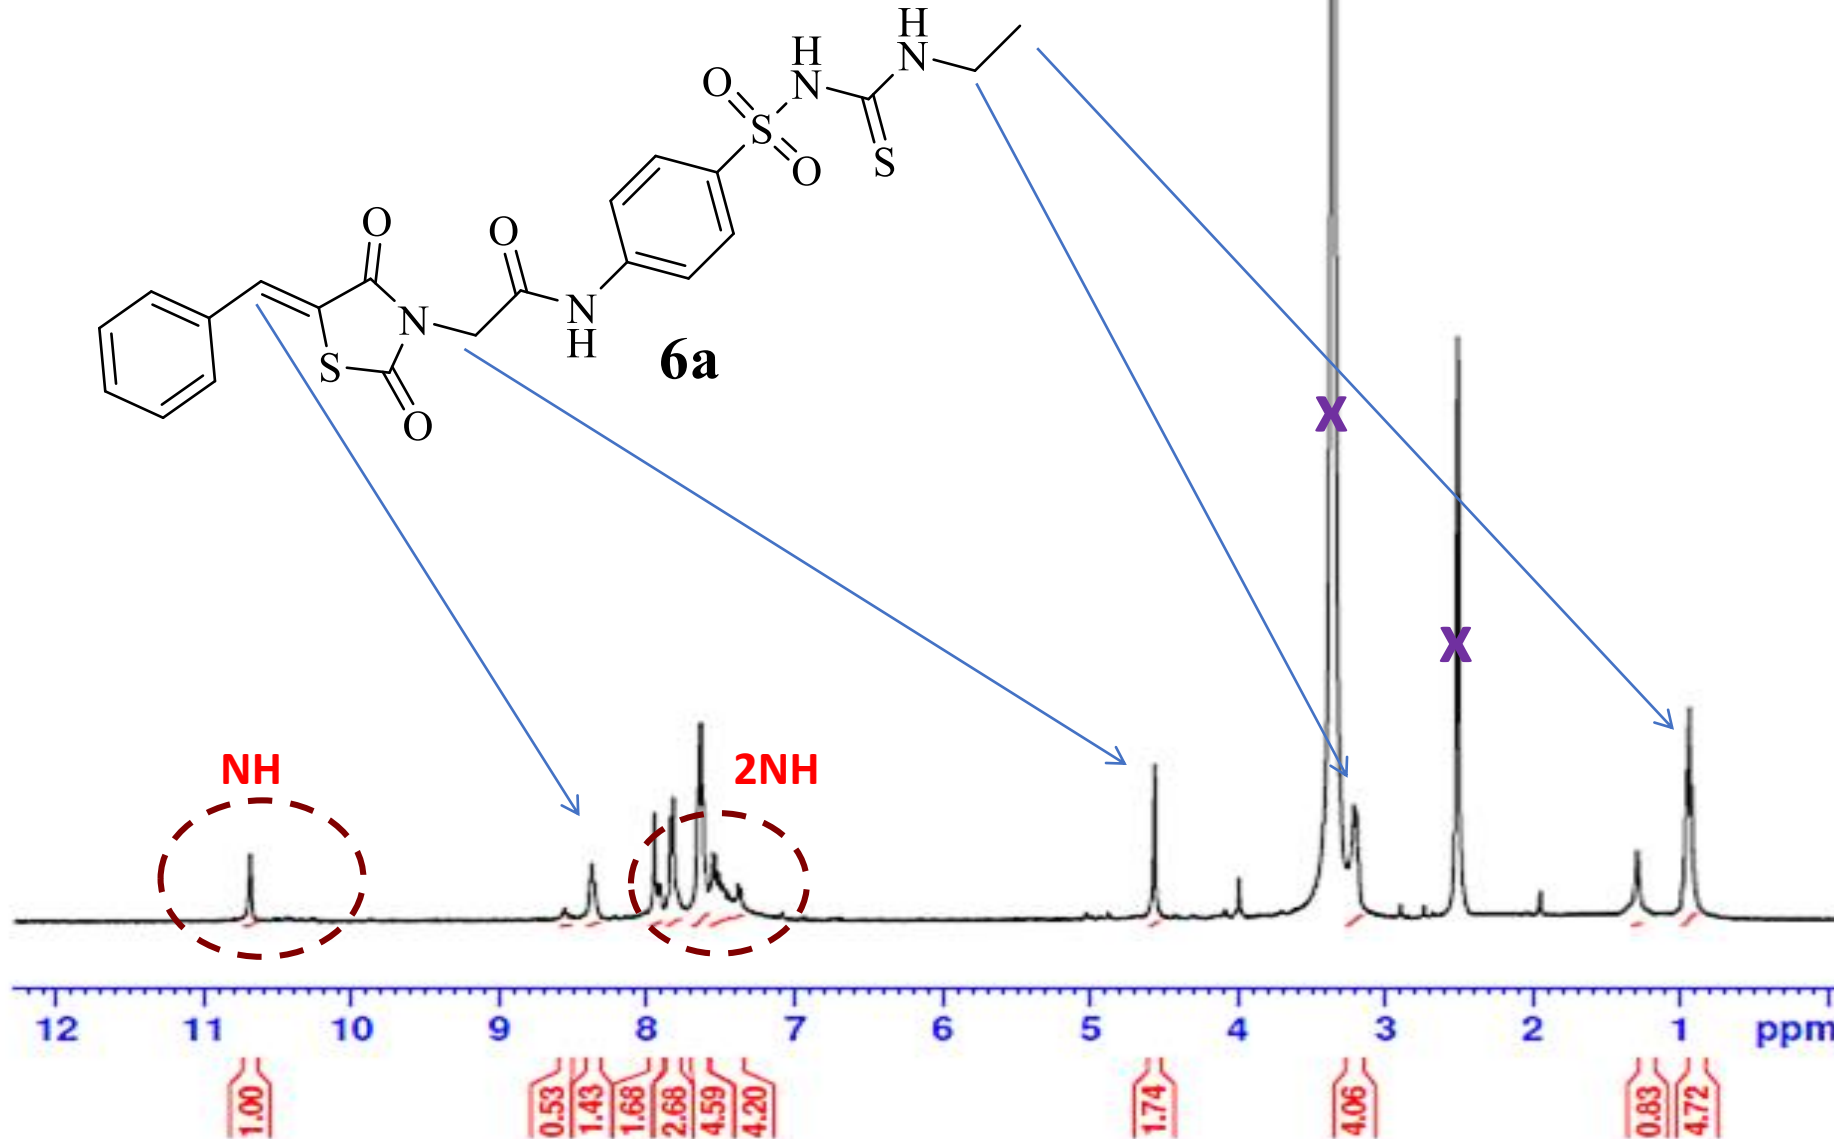

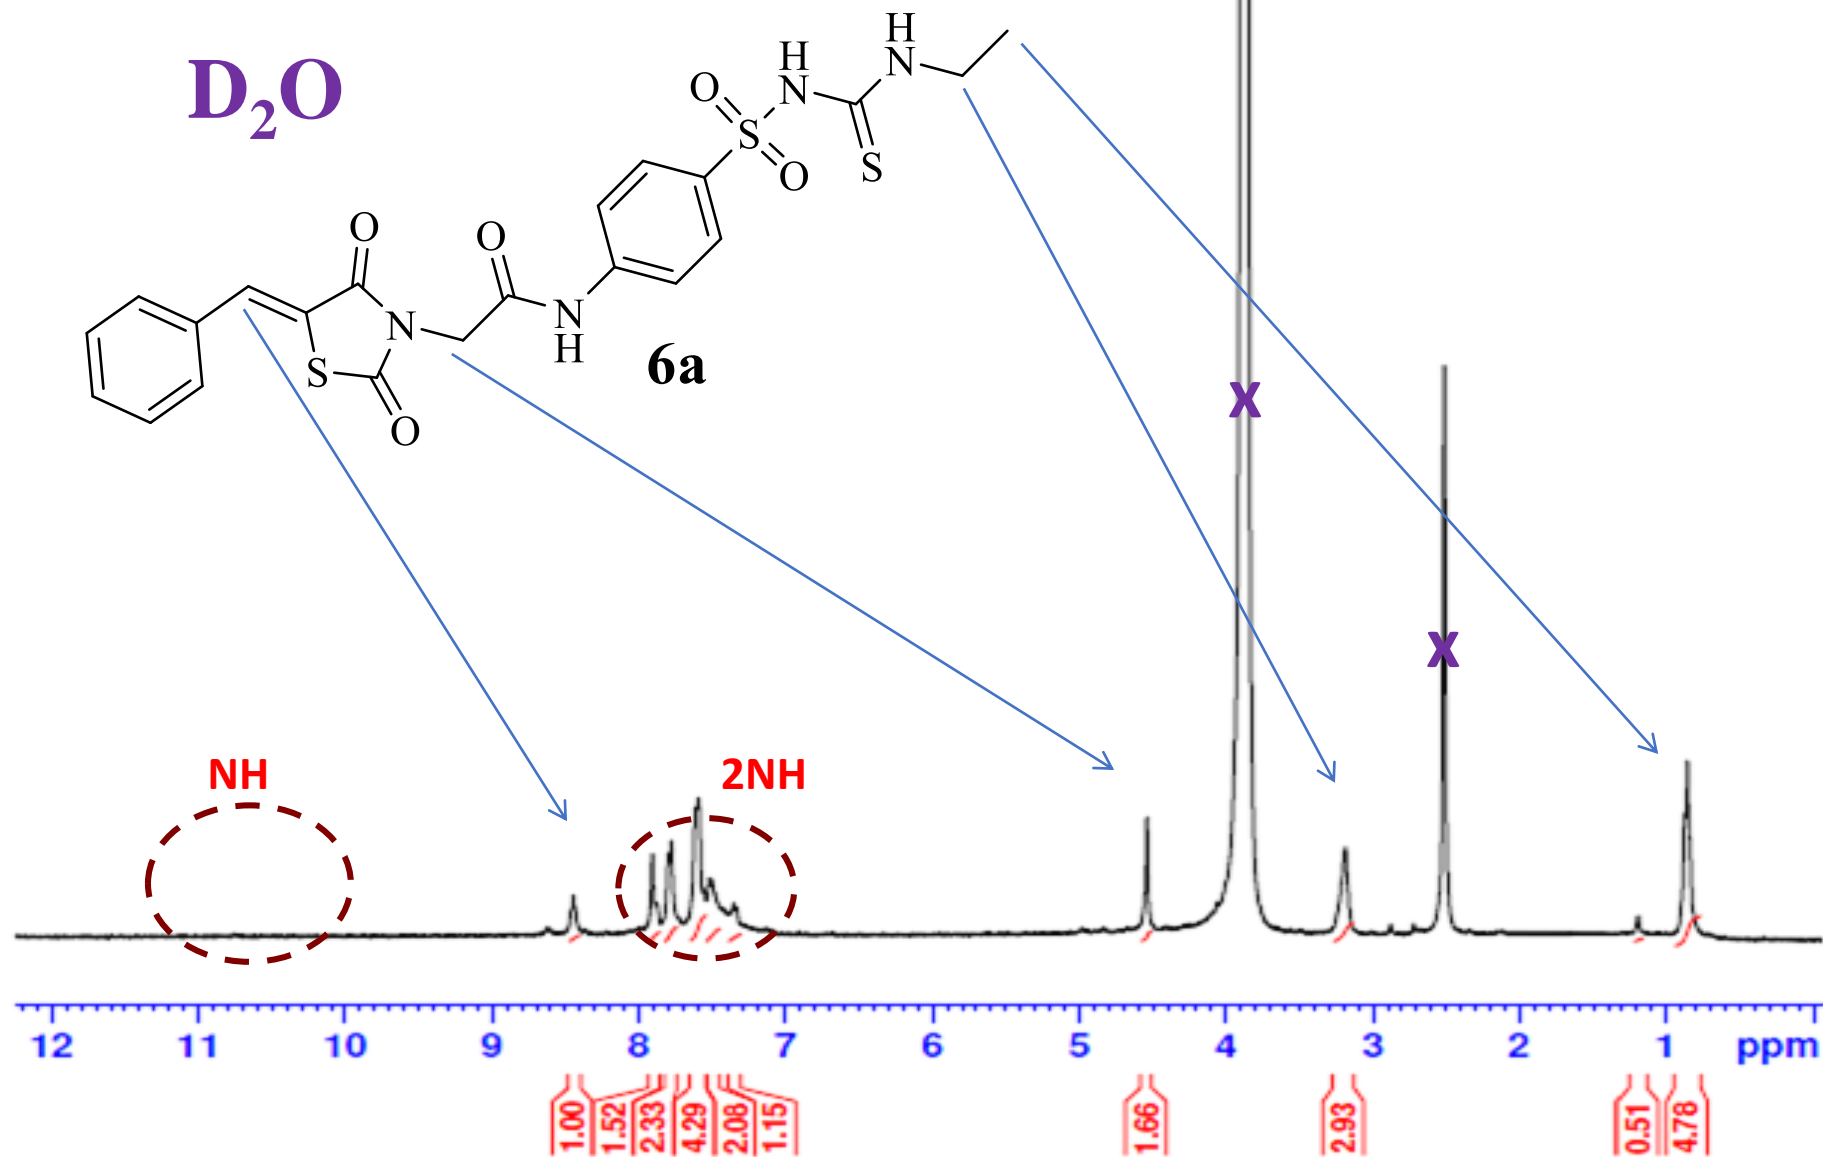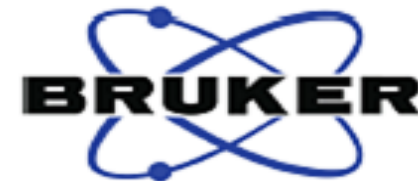

Current Data Parameters  
NAME Z-d2o  
EXPNO 1  
PROCNO 1

F2 - Acquisition Parameters  
Date\_ 20180703  
Time 10.36  
INSTRUM spect  
PROBHD 5 mm PABBO BB/  
PULPROG zg30  
TD 65536  
SOLVENT DMSO  
NS 40  
DS 2  
SWH 8012.820 Hz  
FIDRES 0.122266 Hz  
AQ 4.0894465 sec  
RG 205.37  
DW 62.400 usec  
DE 6.50 usec  
TE 298.0 K  
D1 1.00000000 sec  
TD0 1

----- CHANNEL f1 -----  
SFO1 400.1524711 MHz  
NUC1 1H  
P1 12.00 usec  
PLW1 18.00000000 W

F2 - Processing parameters  
SI 65536  
SF 400.1500000 MHz  
WDW EM  
SSB 0  
LB 0.30 Hz  
GB 0  
PC 1.00

khaled-aladel-d #220 RT: 3.70 AV: 1 SB: 2 4.45 , 4.45 NL: 3.65E2  
T: {0,0} + cEIfull ms [40.00-1000.00]

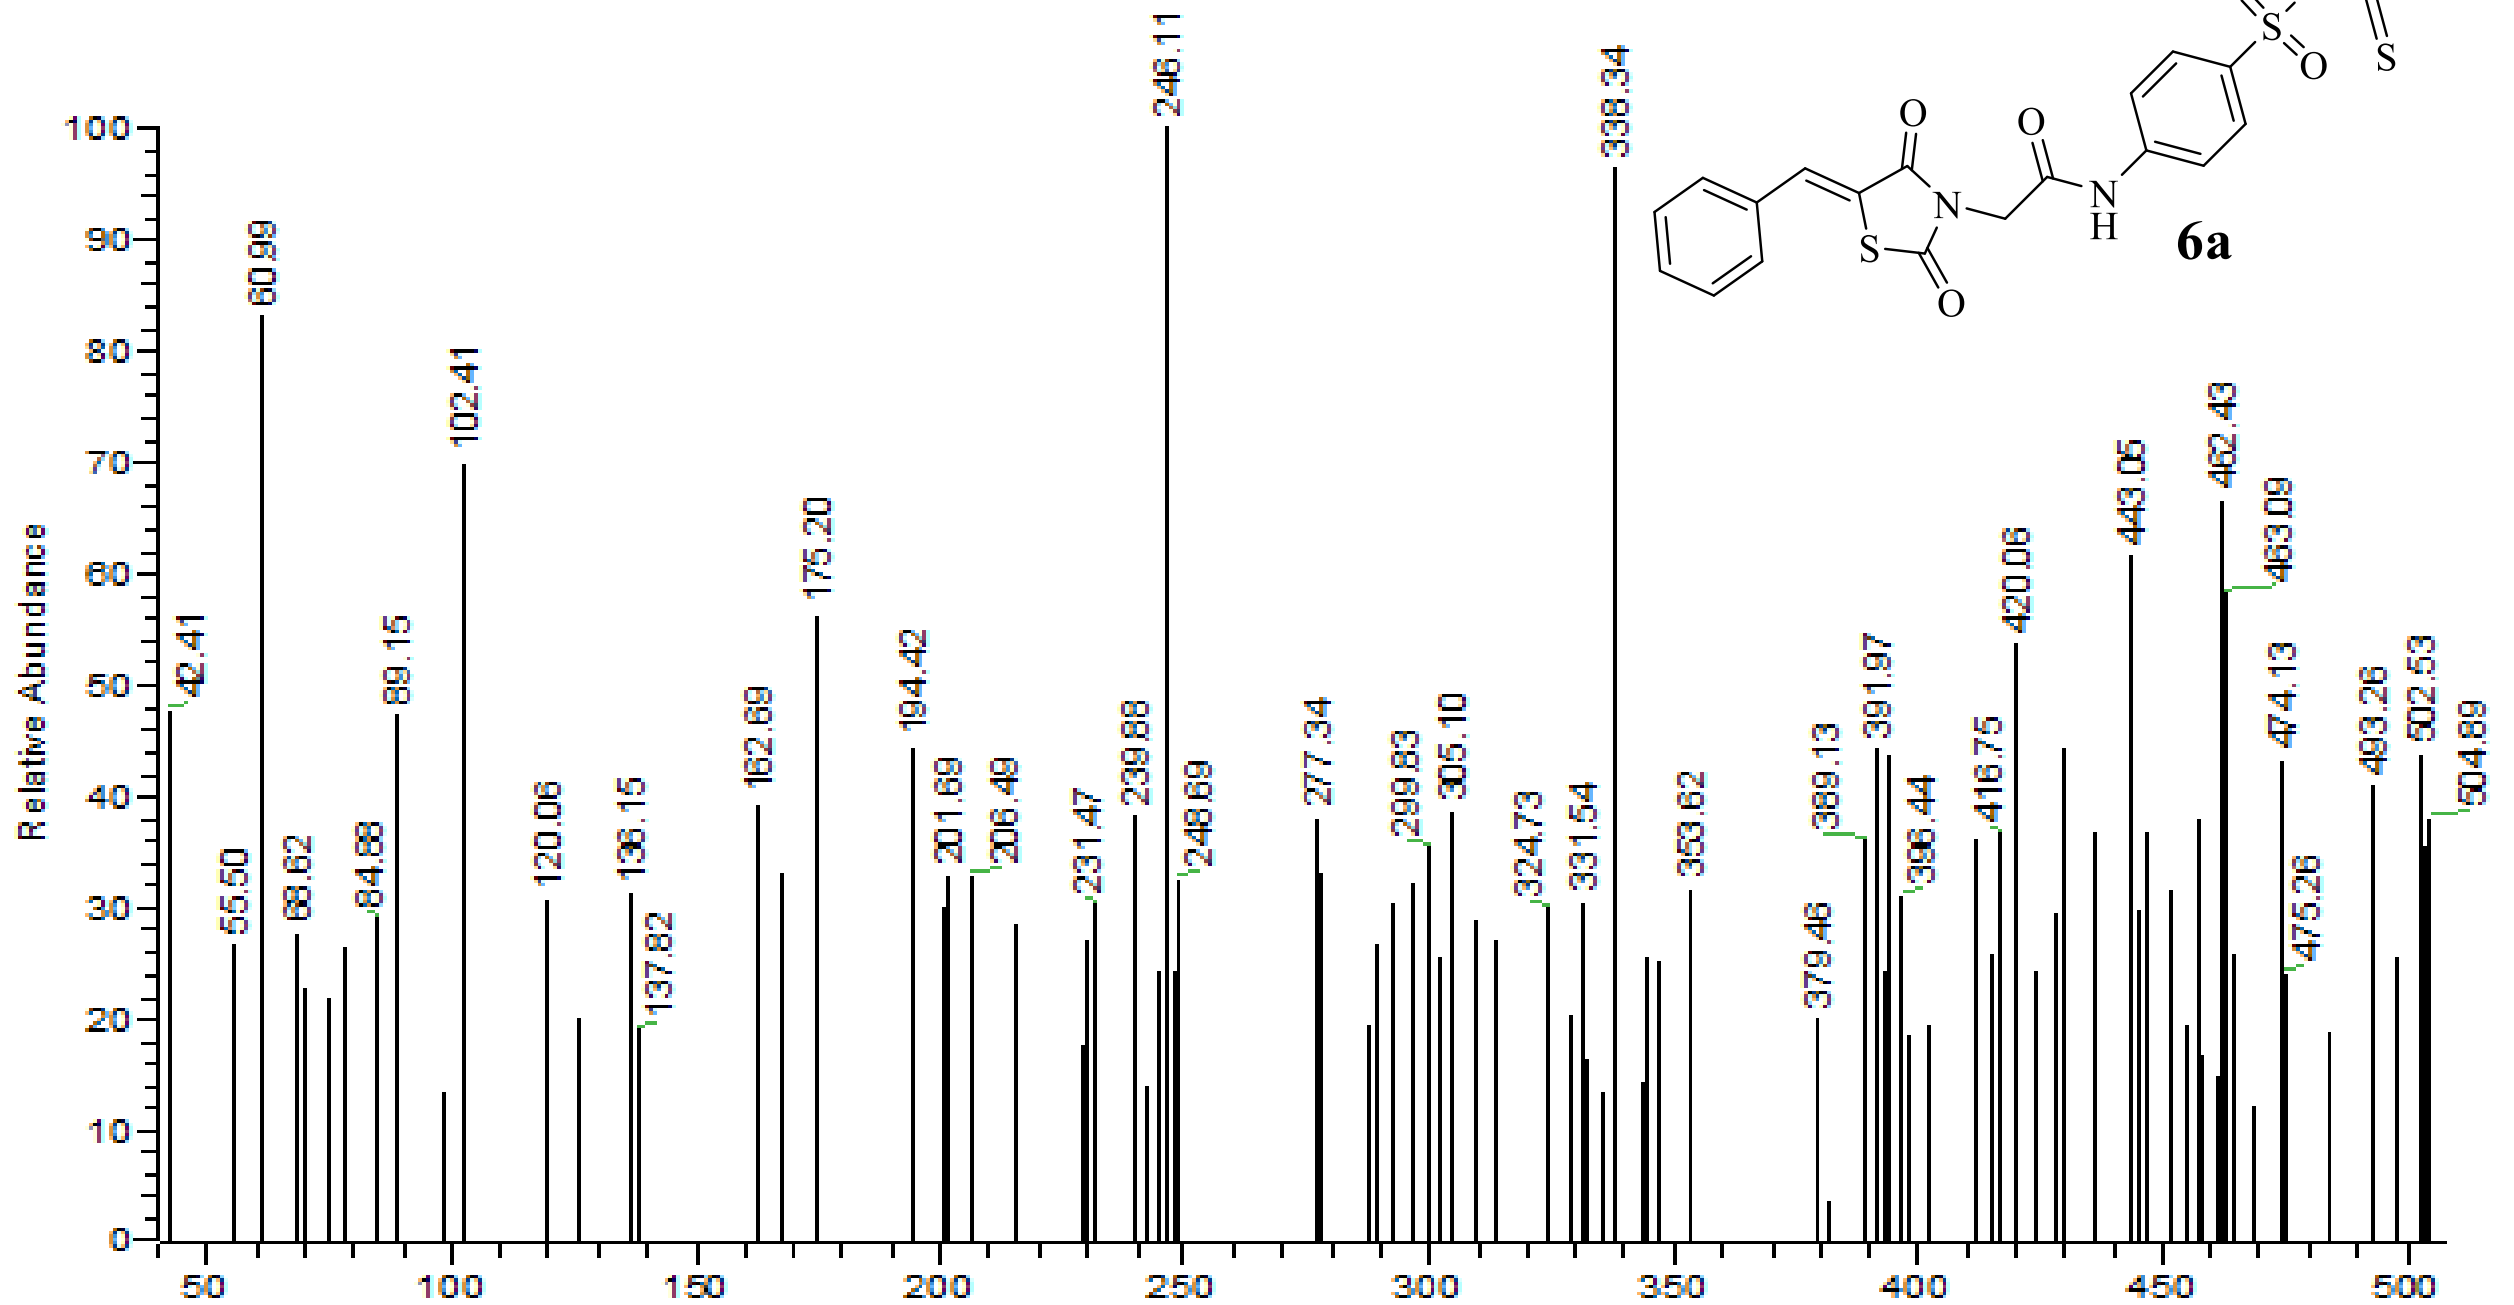



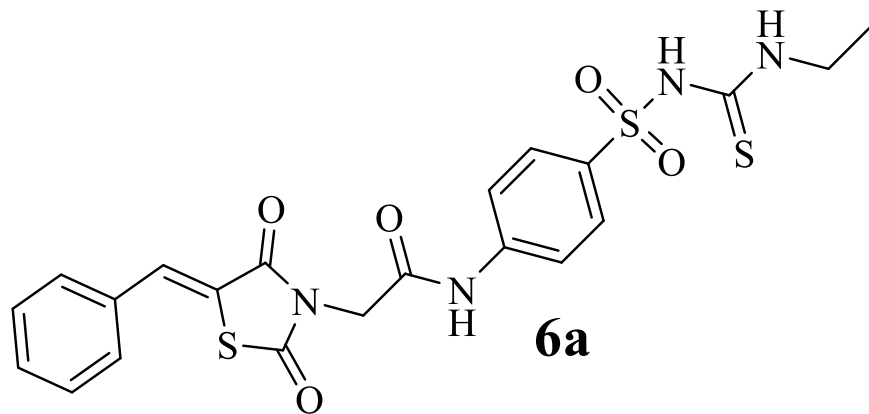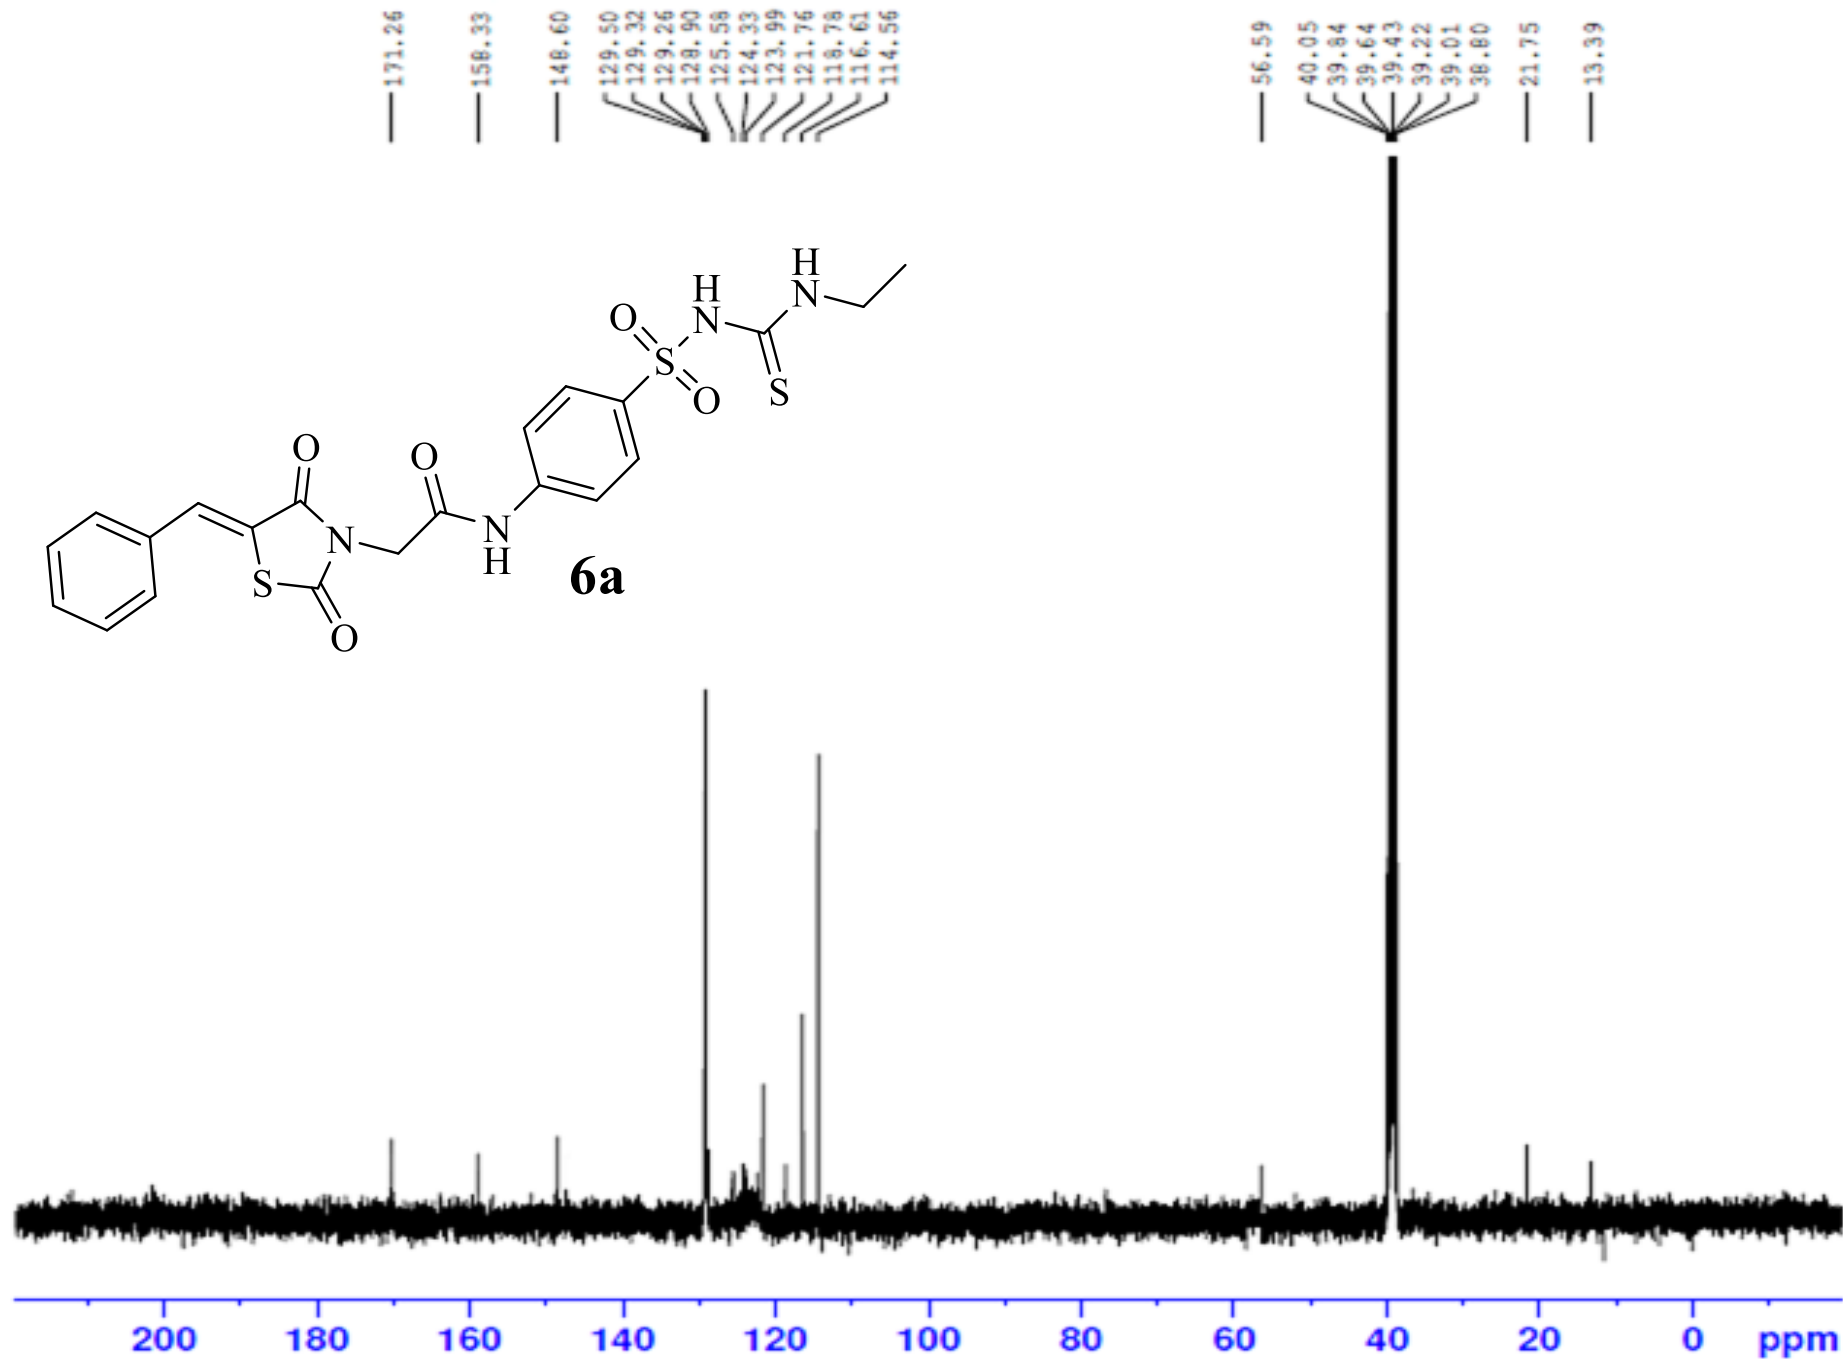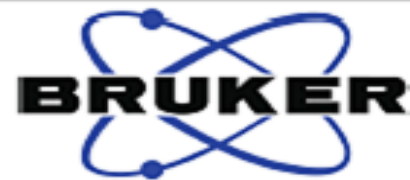

Current Data Parameters  
 NAME KE-F  
 EXPNO 2  
 PROCNO 1

F2 - Acquisition Parameters  
 Date\_ 20200921  
 Time 11.02  
 INSTRUM spect  
 PROBHD 5 mm PABBO BB/  
 PULPROG zgpg30  
 TD 65536  
 SOLVENT DMSO  
 NS 1199  
 DS 4  
 SWH 24038.461 Hz  
 FIDRES 0.366798 Hz  
 AQ 1.3631488 sec  
 RG 205.37  
 DW 20.800 usec  
 DE 6.50 usec  
 TE 300.0 K  
 D1 2.00000000 sec  
 D11 0.03000000 sec  
 TD0 1

----- CHANNEL f1 -----  
 SFO1 100.6278588 MHz  
 NUC1 13C  
 P1 10.00 usec  
 PLW1 47.00000000 W

----- CHANNEL f2 -----  
 SFO2 400.1516006 MHz  
 NUC2 1H  
 CPDPRG[2] waltz16  
 PCPD2 90.00 usec  
 PLW2 18.00000000 W  
 PLW12 0.34722000 W  
 PLW13 0.28125000 W

F2 - Processing parameters  
 SI 32768  
 SF 100.6177975 MHz  
 WDW EM  
 SSB 0  
 LB 1.00 Hz  
 GB 0  
 PC 1.40

7.921  
7.903  
7.649  
7.624  
7.603  
7.553  
7.527  
7.504  
7.488  
7.357  
7.344  
7.322  
7.299  
7.277  
7.242  
7.231  
7.184  
7.165  
7.149  
7.128  
7.100  
7.082  
7.071  
7.052  
7.038  
7.018  
7.005  
6.986  
6.944  
6.917  
6.897  
6.823  
6.802  
6.568  
6.549  
6.504  
6.488  
6.466  
4.955  
3.986  
3.910  
3.397  
3.187

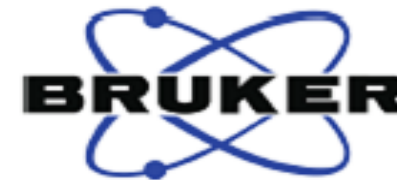

Current Data Parameters  
NAME KE-F  
EXPNO 1  
PROCNO 1

F2 - Acquisition Parameters  
Date\_ 20200817  
Time 11.31  
INSTRUM spect  
PROBHD 5 mm PABBO BB/  
PULPROG zg30  
TD 65536  
SOLVENT DMSO  
NS 58  
DS 2  
SWH 8012.820 Hz  
FIDRES 0.122266 Hz  
AQ 4.0894465 sec  
RG 205.37  
DW 62.400 usec  
DE 6.50 usec  
TE 300.0 K  
D1 1.00000000 sec  
TD0 1

----- CHANNEL f1 -----  
SFO1 400.1524711 MHz  
NUC1 1H  
P1 12.00 usec  
PLW1 18.00000000 W

F2 - Processing parameters  
SI 65536  
SF 400.1500000 MHz  
WDW EM  
SSB 0  
LB 0.30 Hz  
GB 0  
PC 1.00

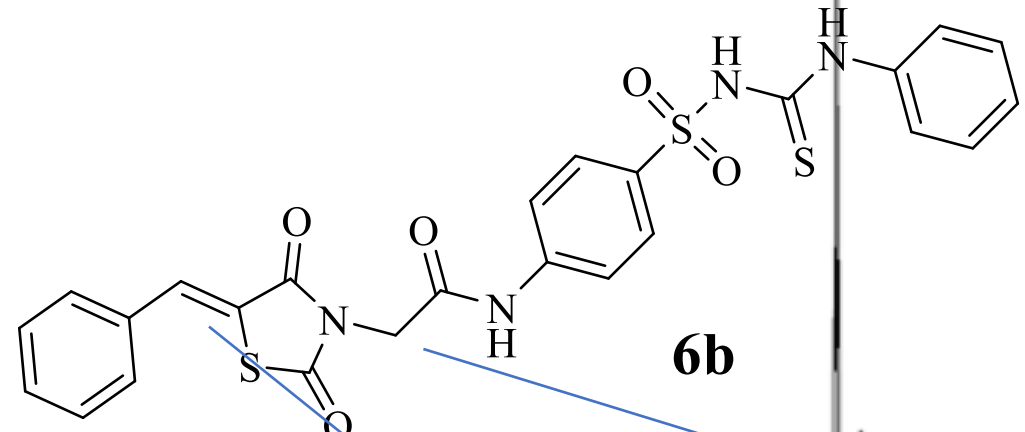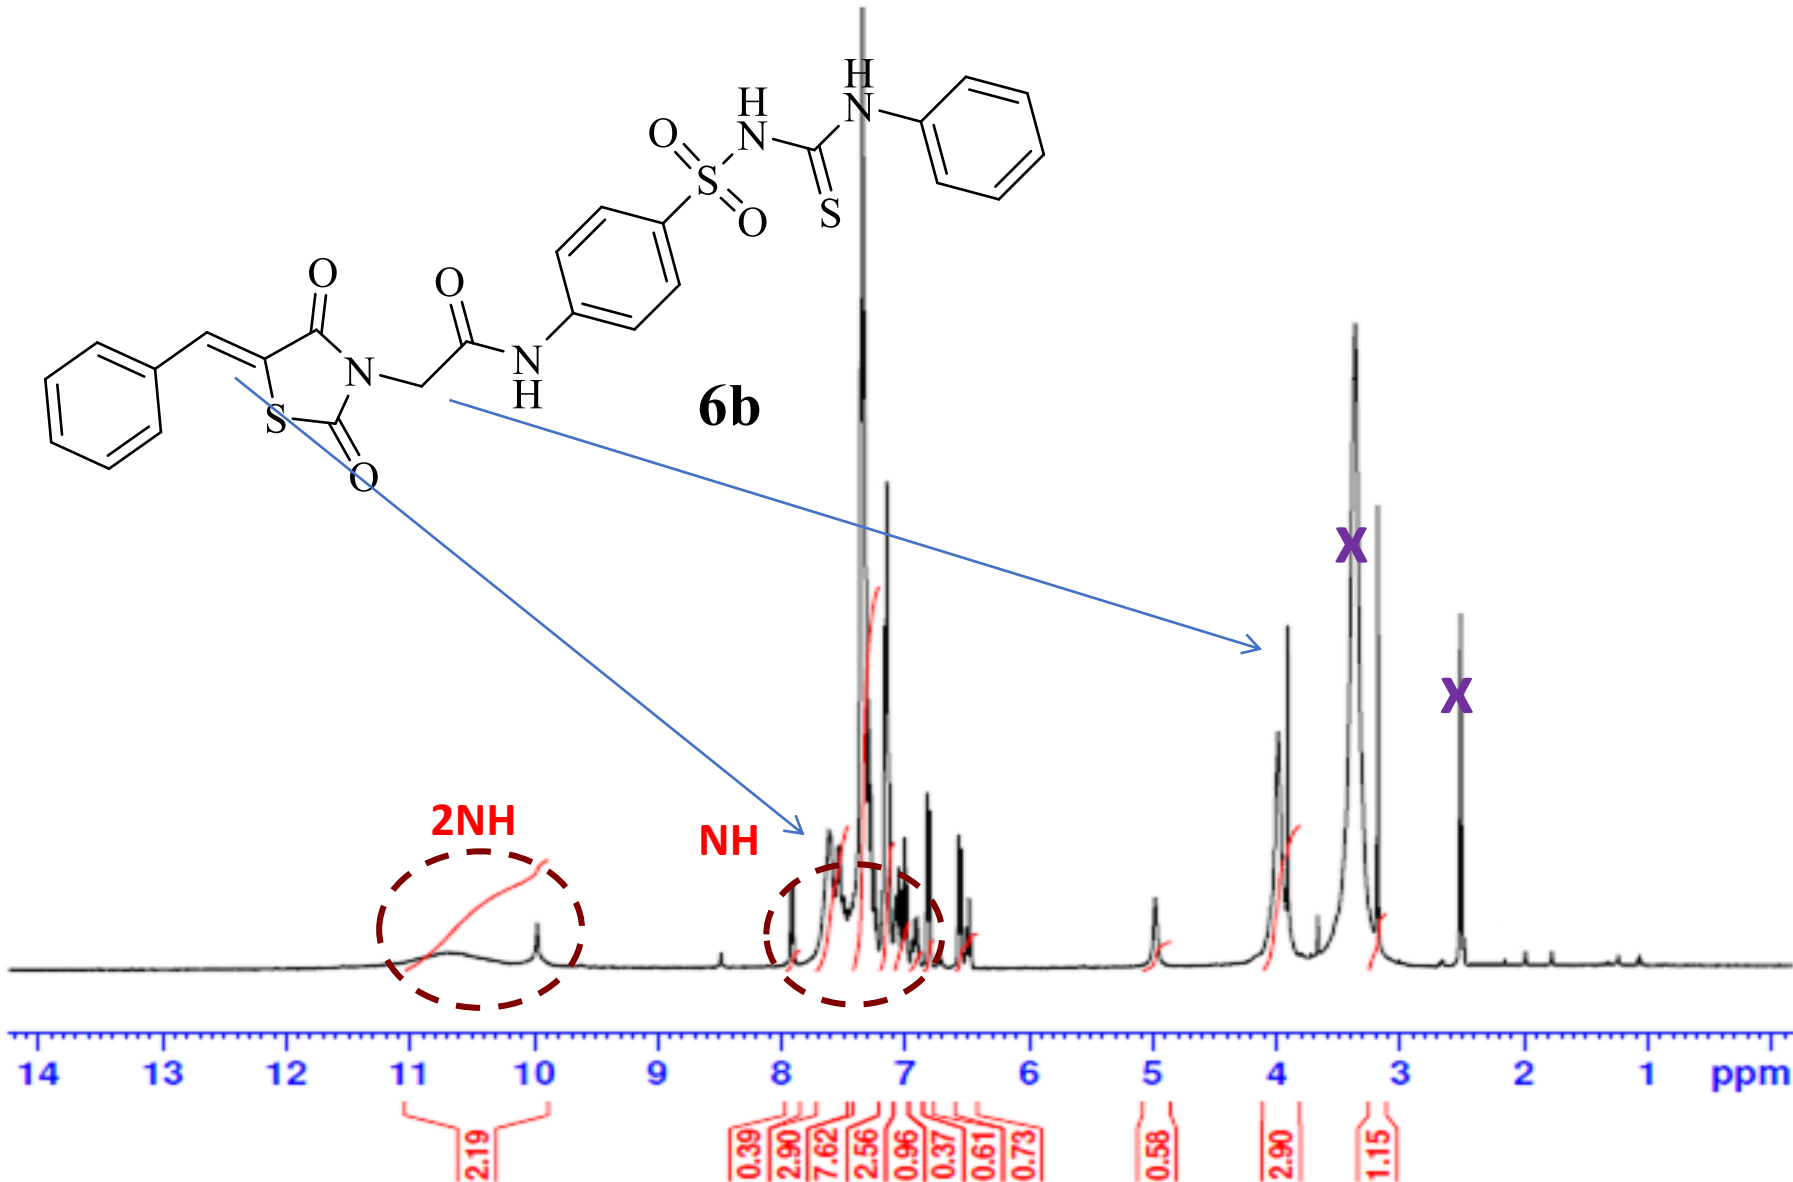

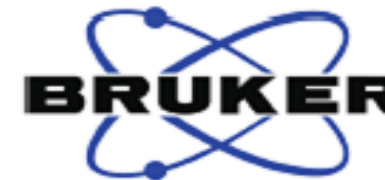

Current Data Parameters  
NAME KE-F-d2o  
EXPNO 1  
PROCNO 1

F2 - Acquisition Parameters  
Date\_ 20200818  
Time 9.01  
INSTRUM spect  
PROBHD 5 mm PABBO BB/  
PULPROG zg30  
ID 65536  
SOLVENT DMSO  
NS 27  
DS 2  
SWH 8012.820 Hz  
FIDRES 0.122266 Hz  
AQ 4.0894465 sec  
RG 205.37  
DW 62.400 usec  
DE 6.50 usec  
TE 300.0 K  
D1 1.00000000 sec  
TD0 1

----- CHANNEL f1 -----  
SFO1 400.1524711 MHz  
NUC1 1H  
P1 12.00 usec  
PLW1 18.00000000 W

F2 - Processing parameters  
SI 65536  
SF 400.150000 MHz  
WDW EM  
SSB 0  
LB 0.30 Hz  
GB 0  
PC 1.00

7.840  
7.802  
7.602  
7.526  
7.501  
7.451  
7.355  
7.322  
7.288  
7.251  
7.151  
7.046  
7.029  
6.996  
6.812  
6.775  
6.591  
6.553  
6.524  
6.495  
6.457  
3.968  
3.880  
3.722  
3.162  
2.506

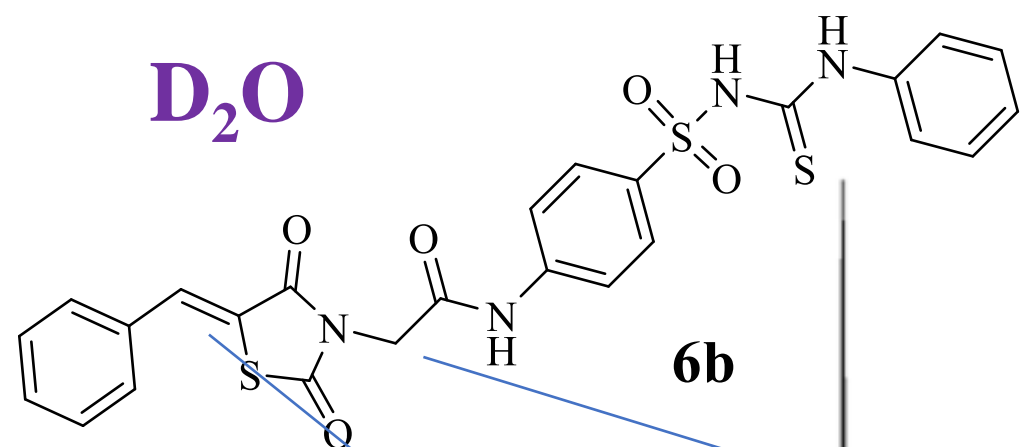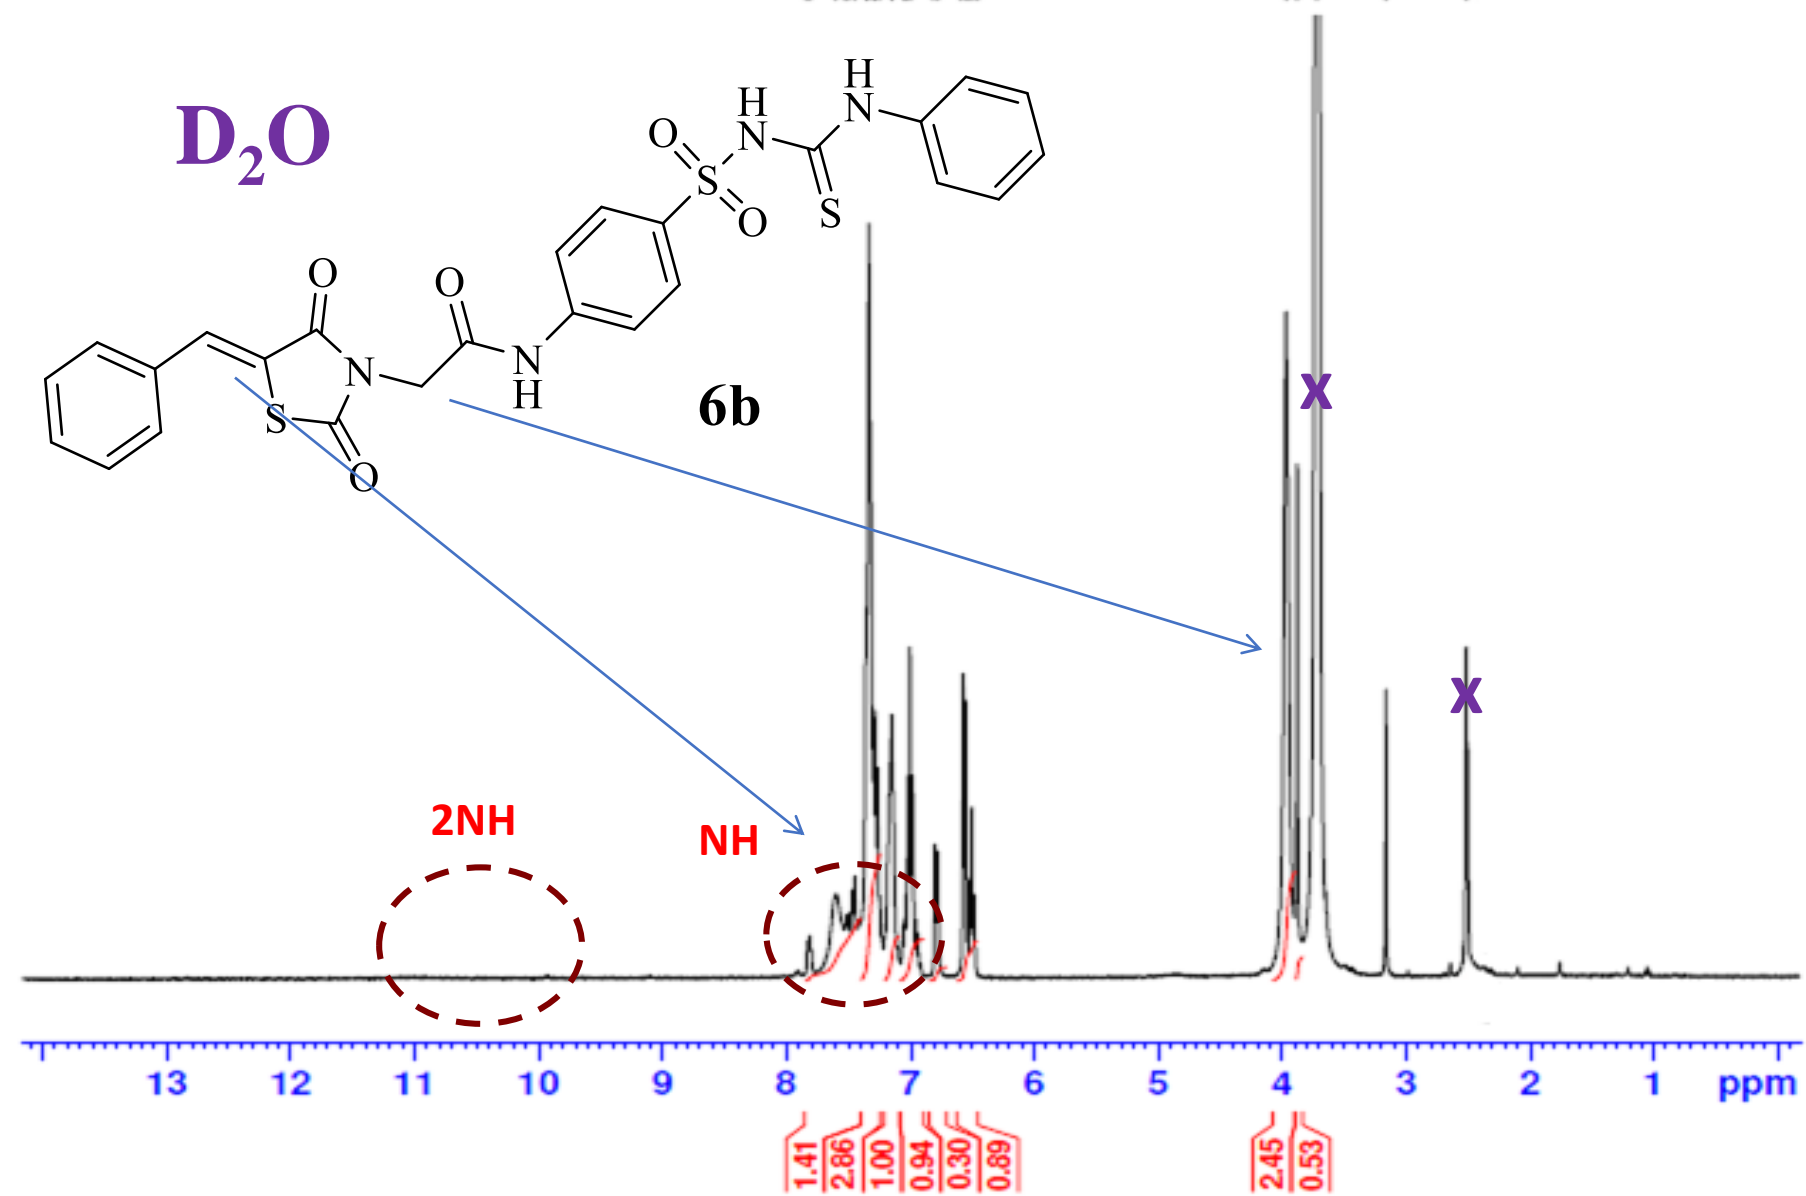

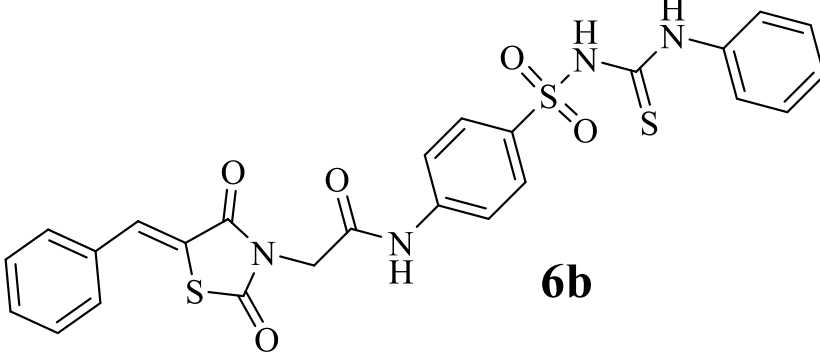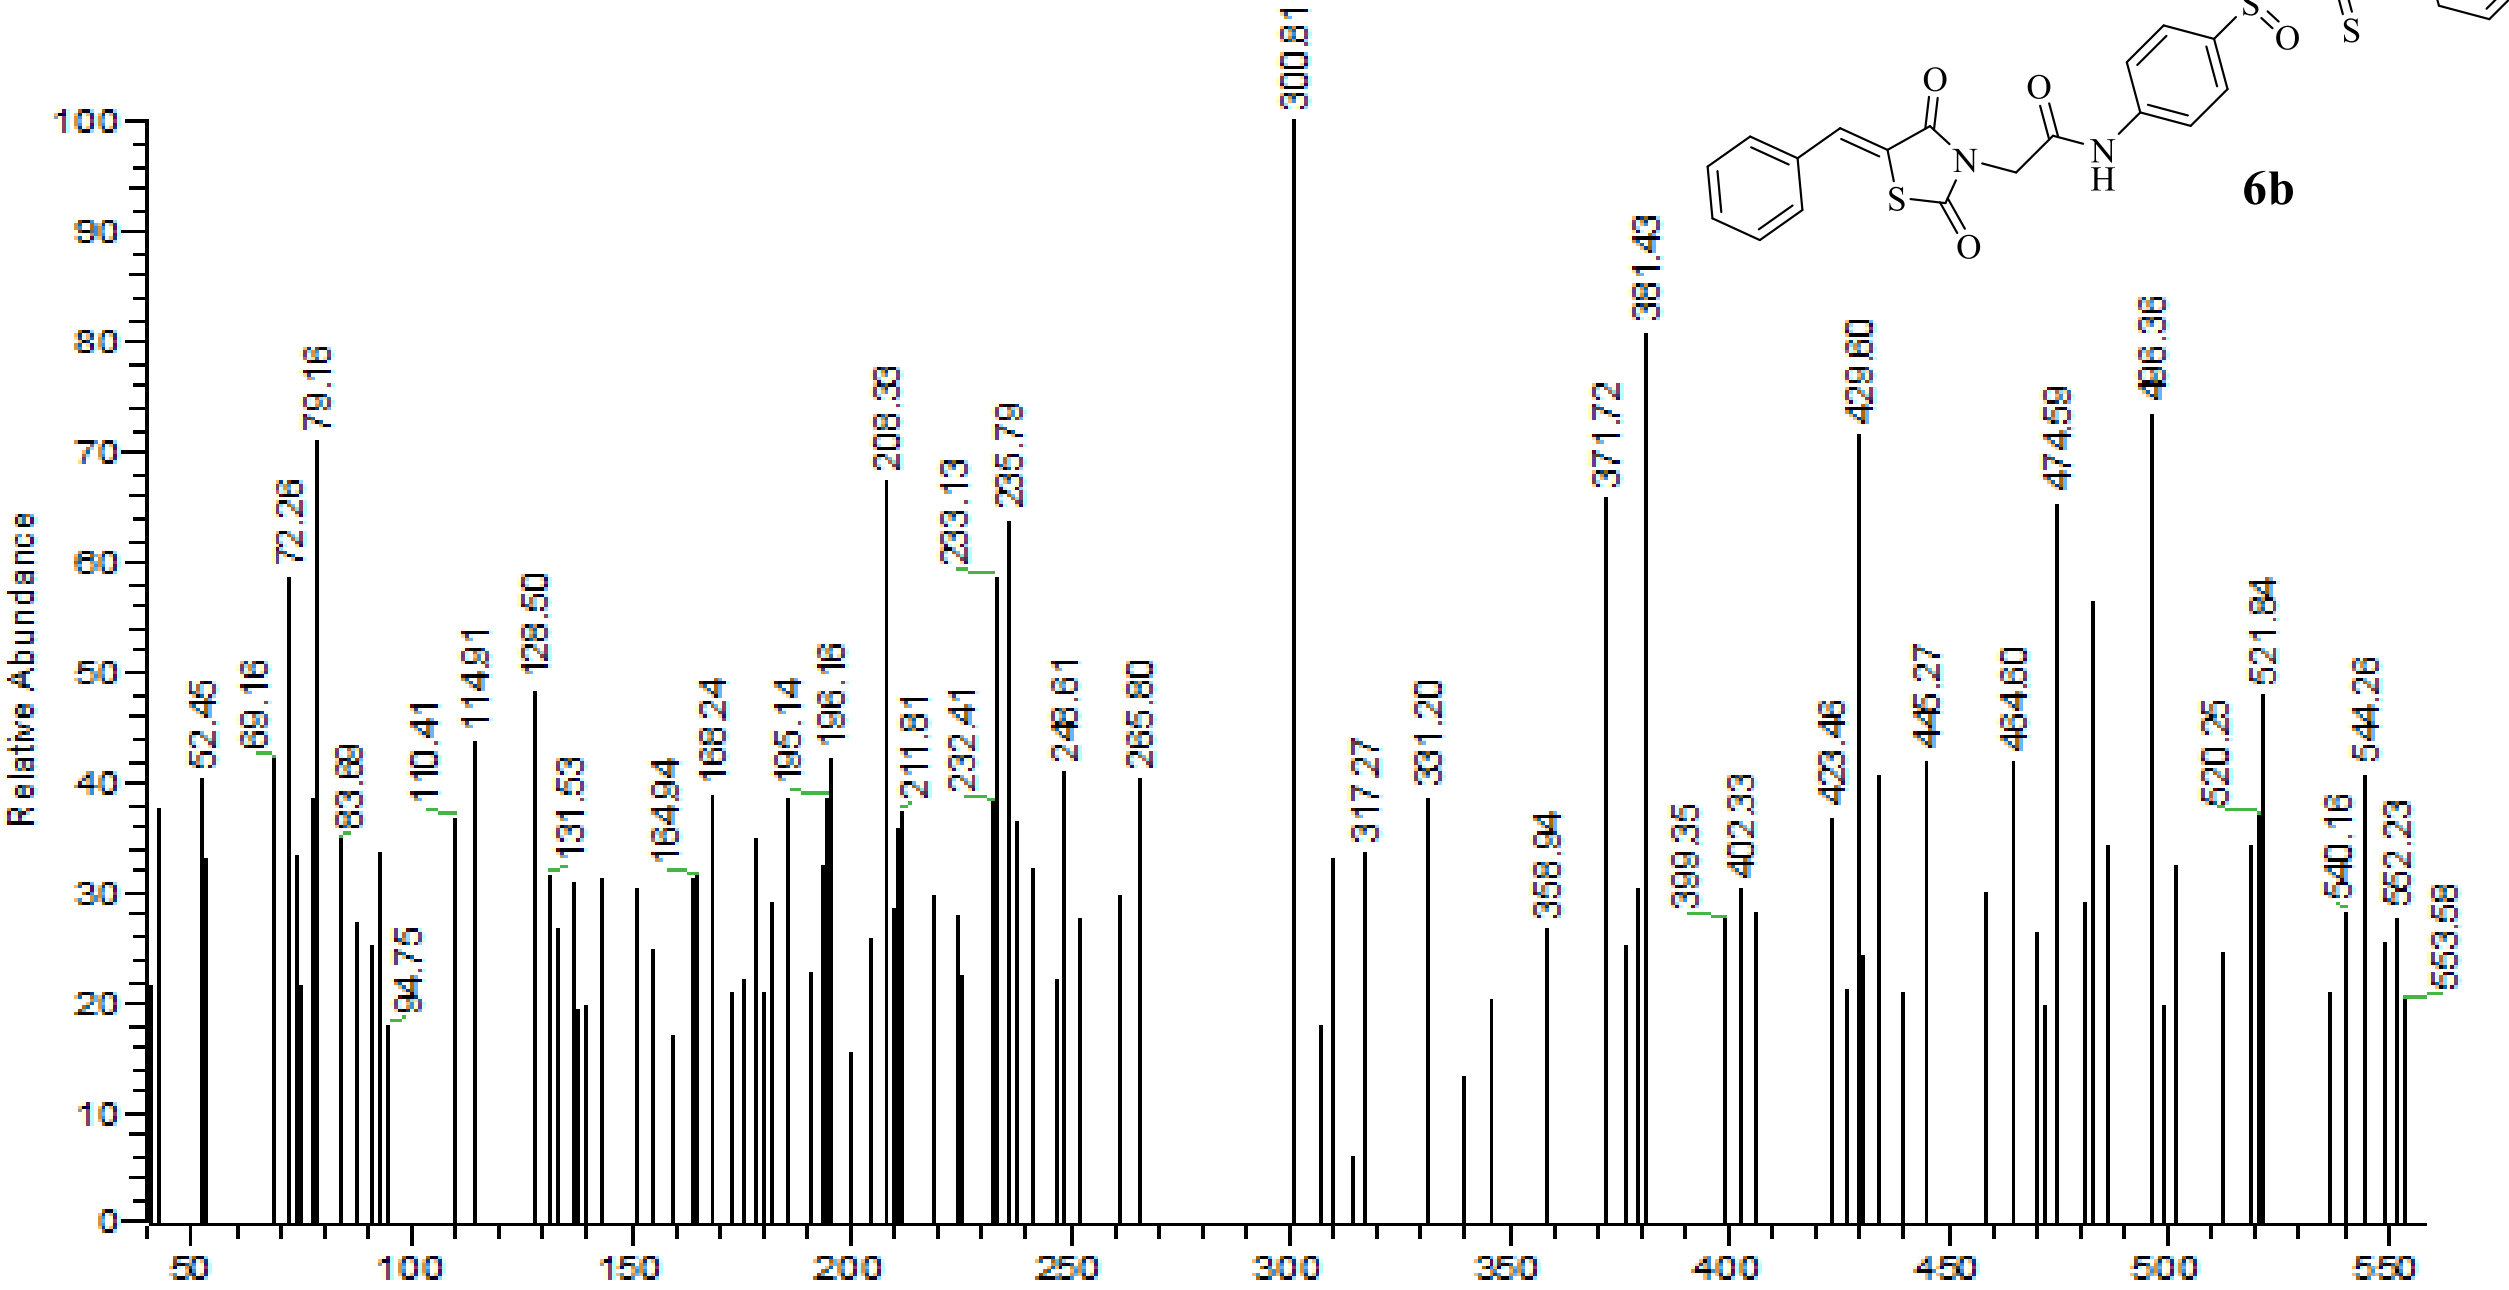

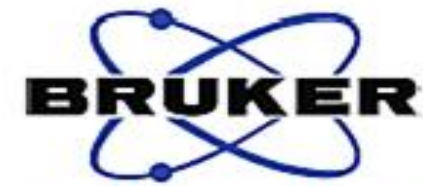

Current Data Parameters  
NAME KE-B  
EXPNO 1  
PROCNO 1

F2 - Acquisition Parameters  
Date\_ 20200817  
Time 11.51  
INSTRUM spect  
PROBHD 5 mm PABBO BB/  
PULPROG zg30  
TD 65536  
SOLVENT DMSO  
NS 42  
DS 2  
SWH 8012.820 Hz  
FIDRES 0.122266 Hz  
AQ 4.0894465 sec  
RG 205.37  
DW 62.400 usec  
DE 6.50 usec  
TE 300.0 K  
D1 1.00000000 sec  
TD0 1

----- CHANNEL f1 -----  
SFO1 400.1524711 MHz  
NUC1 1H  
P1 12.00 usec  
PLW1 18.00000000 W

F2 - Processing parameters  
SI 65536  
SF 400.1500000 MHz  
WDW EM  
SSB 0  
LB 0.30 Hz  
GB 0  
PC 1.00

10.430  
10.005  
8.424  
7.990  
7.967  
7.936  
7.914  
7.797  
7.764  
7.740  
7.718  
7.700  
7.606  
7.582  
7.437  
7.243  
6.024  
4.199  
4.099  
4.037  
3.918  
3.631  
3.575  
3.518  
3.481  
3.356  
2.493  
1.931  
1.825  
1.587  
1.369  
1.244

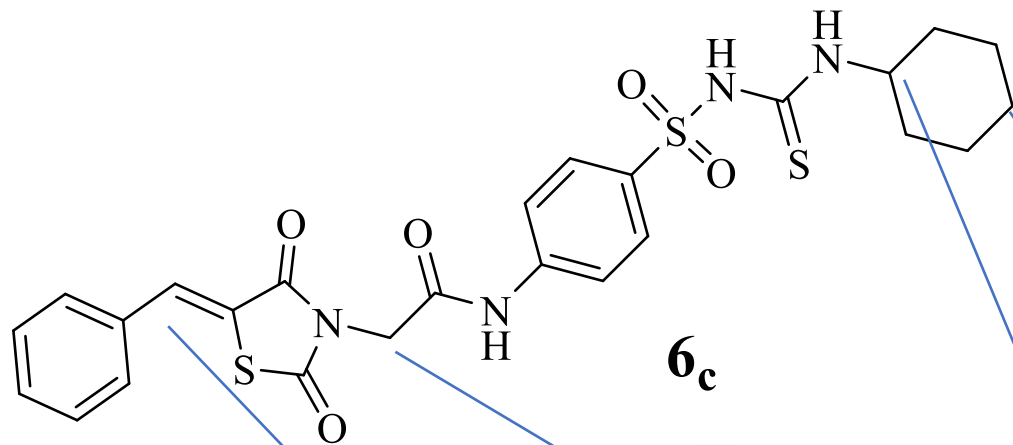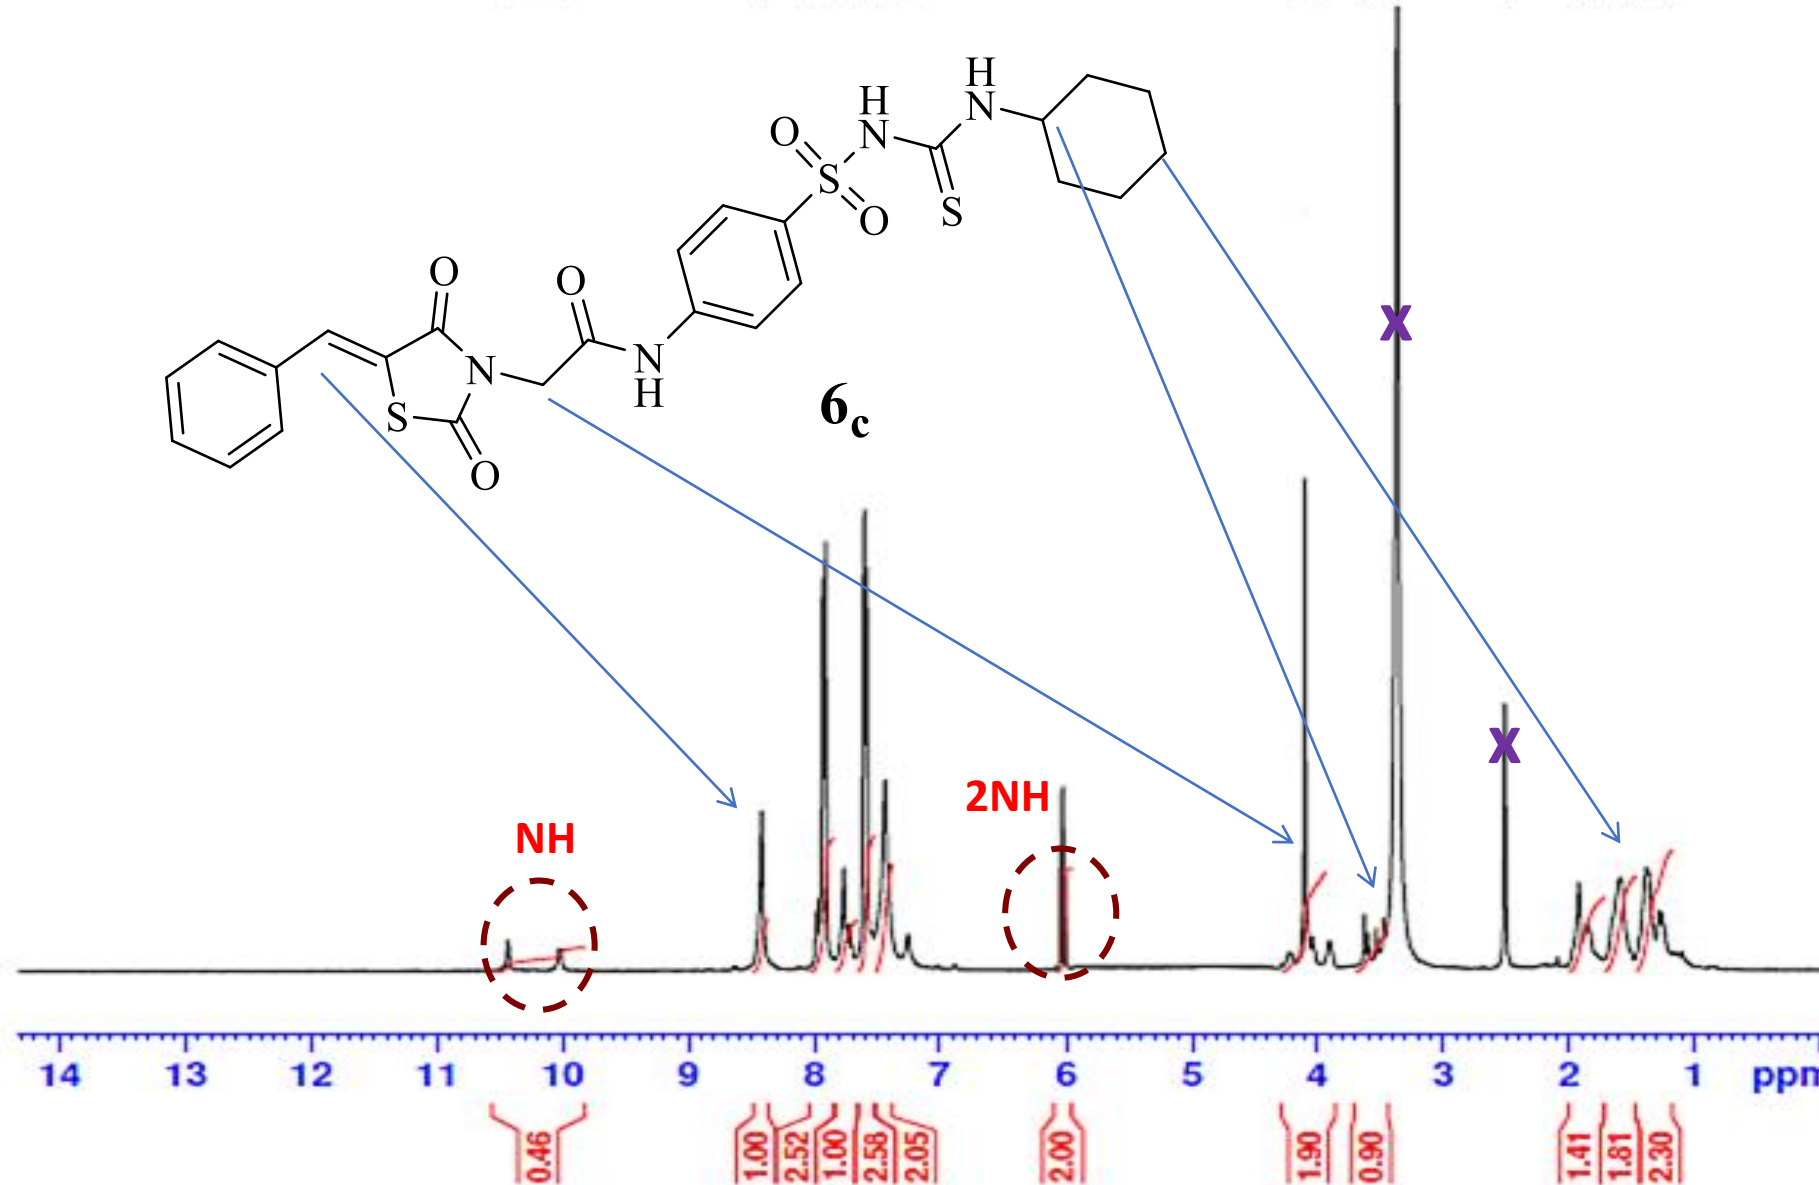



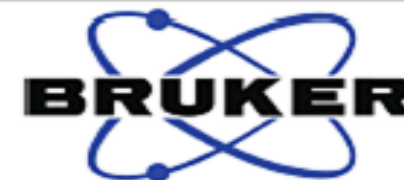

Current Data Parameters  
NAME KE-B-d2o  
EXPNO 1  
PROCNO 1

F2 - Acquisition Parameters  
Date\_ 20200818  
Time 9.53  
INSTRUM spect  
PROBHD 5 mm PABBO BB/  
PULPROG zg30  
TD 65536  
SOLVENT DMSO  
NS 46  
DS 2  
SWH 8012.820 Hz  
FIDRES 0.122266 Hz  
AQ 4.0894465 sec  
RG 205.37  
DW 62.400 usec  
DE 6.50 usec  
TE 300.0 K  
D1 1.00000000 sec  
TDO 1

----- CHANNEL f1 -----  
SFO1 400.1524711 MHz  
NUC1 1H  
P1 12.00 usec  
PLW1 18.00000000 W

F2 - Processing parameters  
SI 65536  
SF 400.1500000 MHz  
WDW EM  
SSB 0  
LB 0.30 Hz  
GB 0  
PC 1.00

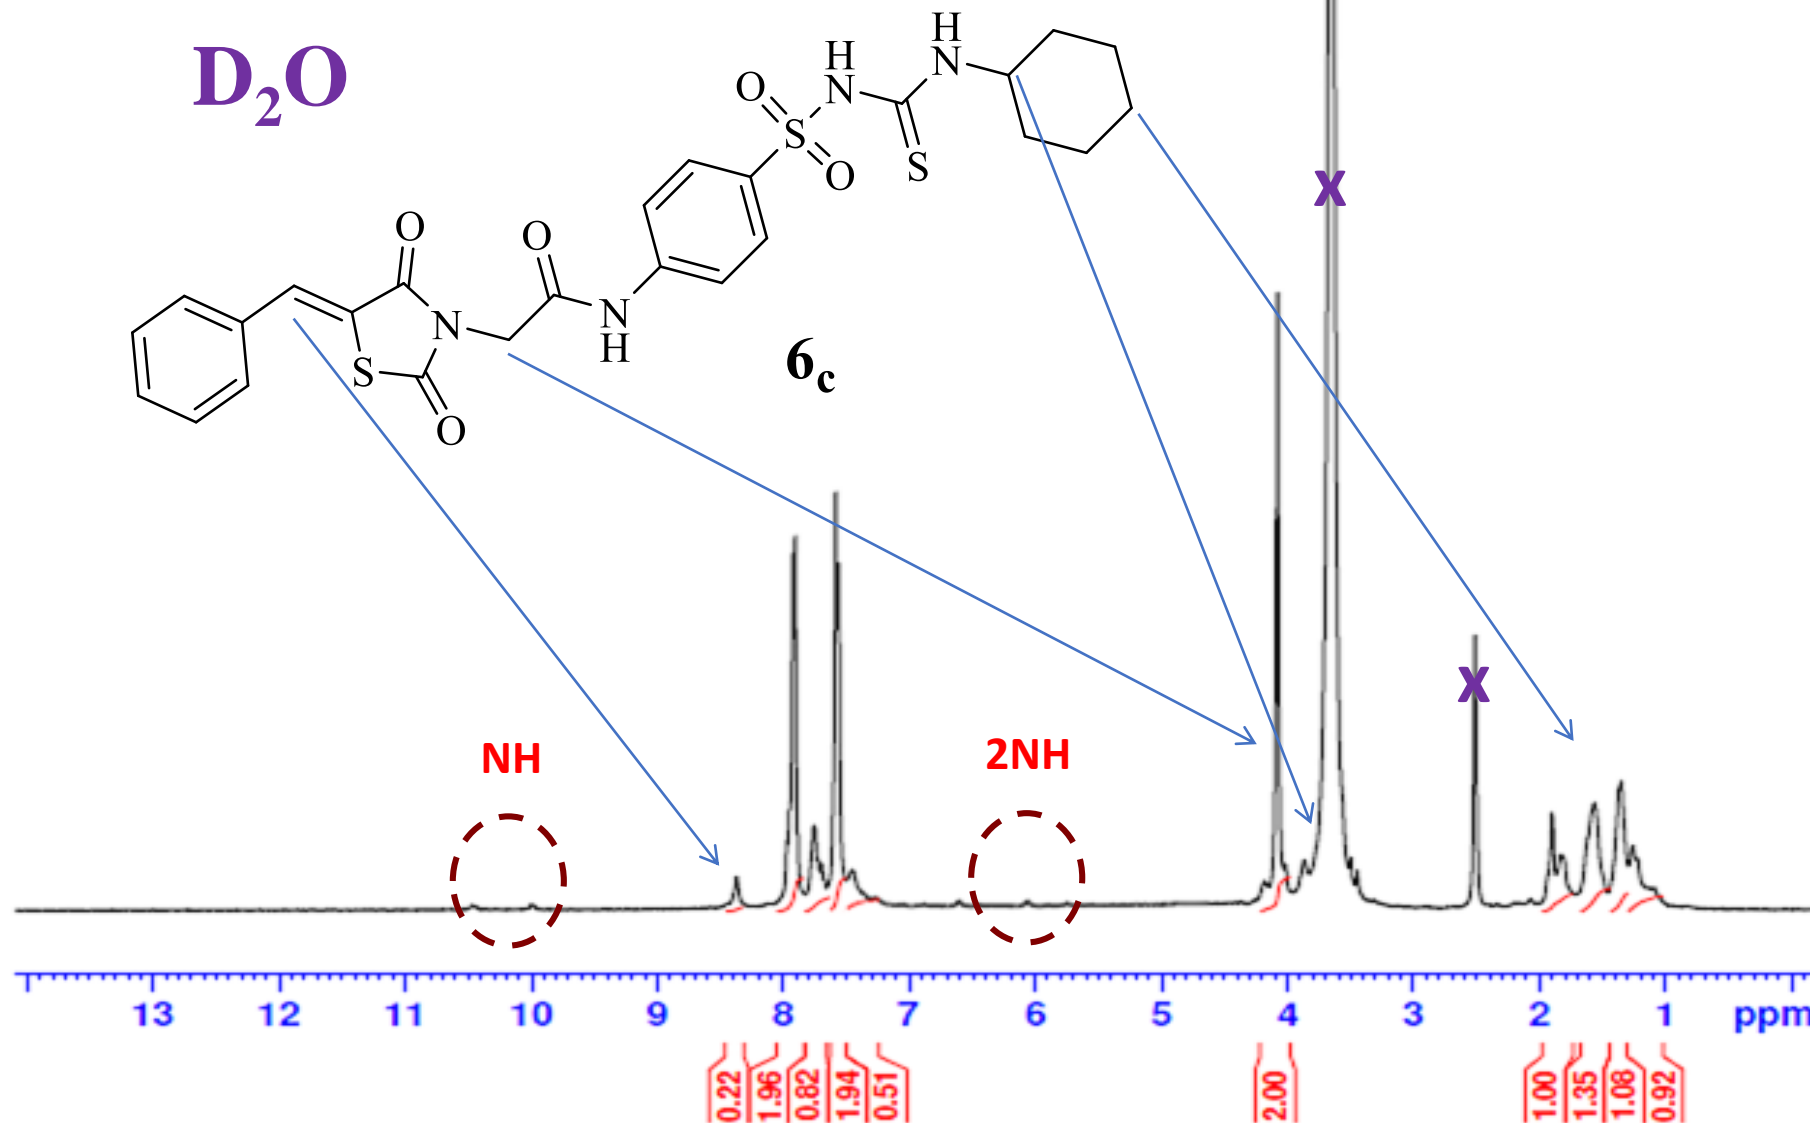

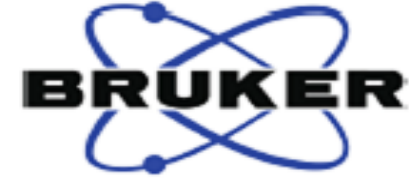

Current Data Parameters  
NAME KE-B  
EXPNO 2  
PROCNO 1

F2 - Acquisition Parameters  
Date\_ 20200922  
Time 10.28  
INSTRUM spect  
PROBHD 5 mm PABBO BB/  
PULPROG zgpg30  
ID 65536  
SOLVENT DMSO  
NS 1751  
DS 4  
SWH 24038.461 Hz  
FIDRES 0.366798 Hz  
AQ 1.3631488 sec  
RG 205.37  
DW 20.800 usec  
DE 6.50 usec  
TE 300.0 K  
D1 2.00000000 sec  
D11 0.03000000 sec  
TD0 1

----- CHANNEL f1 -----  
SFO1 100.6278588 MHz  
NUC1 13C  
P1 10.00 usec  
PLW1 47.00000000 W

----- CHANNEL f2 -----  
SFO2 400.1516006 MHz  
NUC2 1H  
CPDPRG[2] waltz16  
PCPD2 90.00 usec  
PLW2 18.00000000 W  
PLW12 0.34722000 W  
PLW13 0.28125000 W

F2 - Processing parameters  
SI 32768  
SF 100.6177975 MHz  
WDW EM  
SSB 0  
LB 1.00 Hz  
GB 0  
PC 1.40

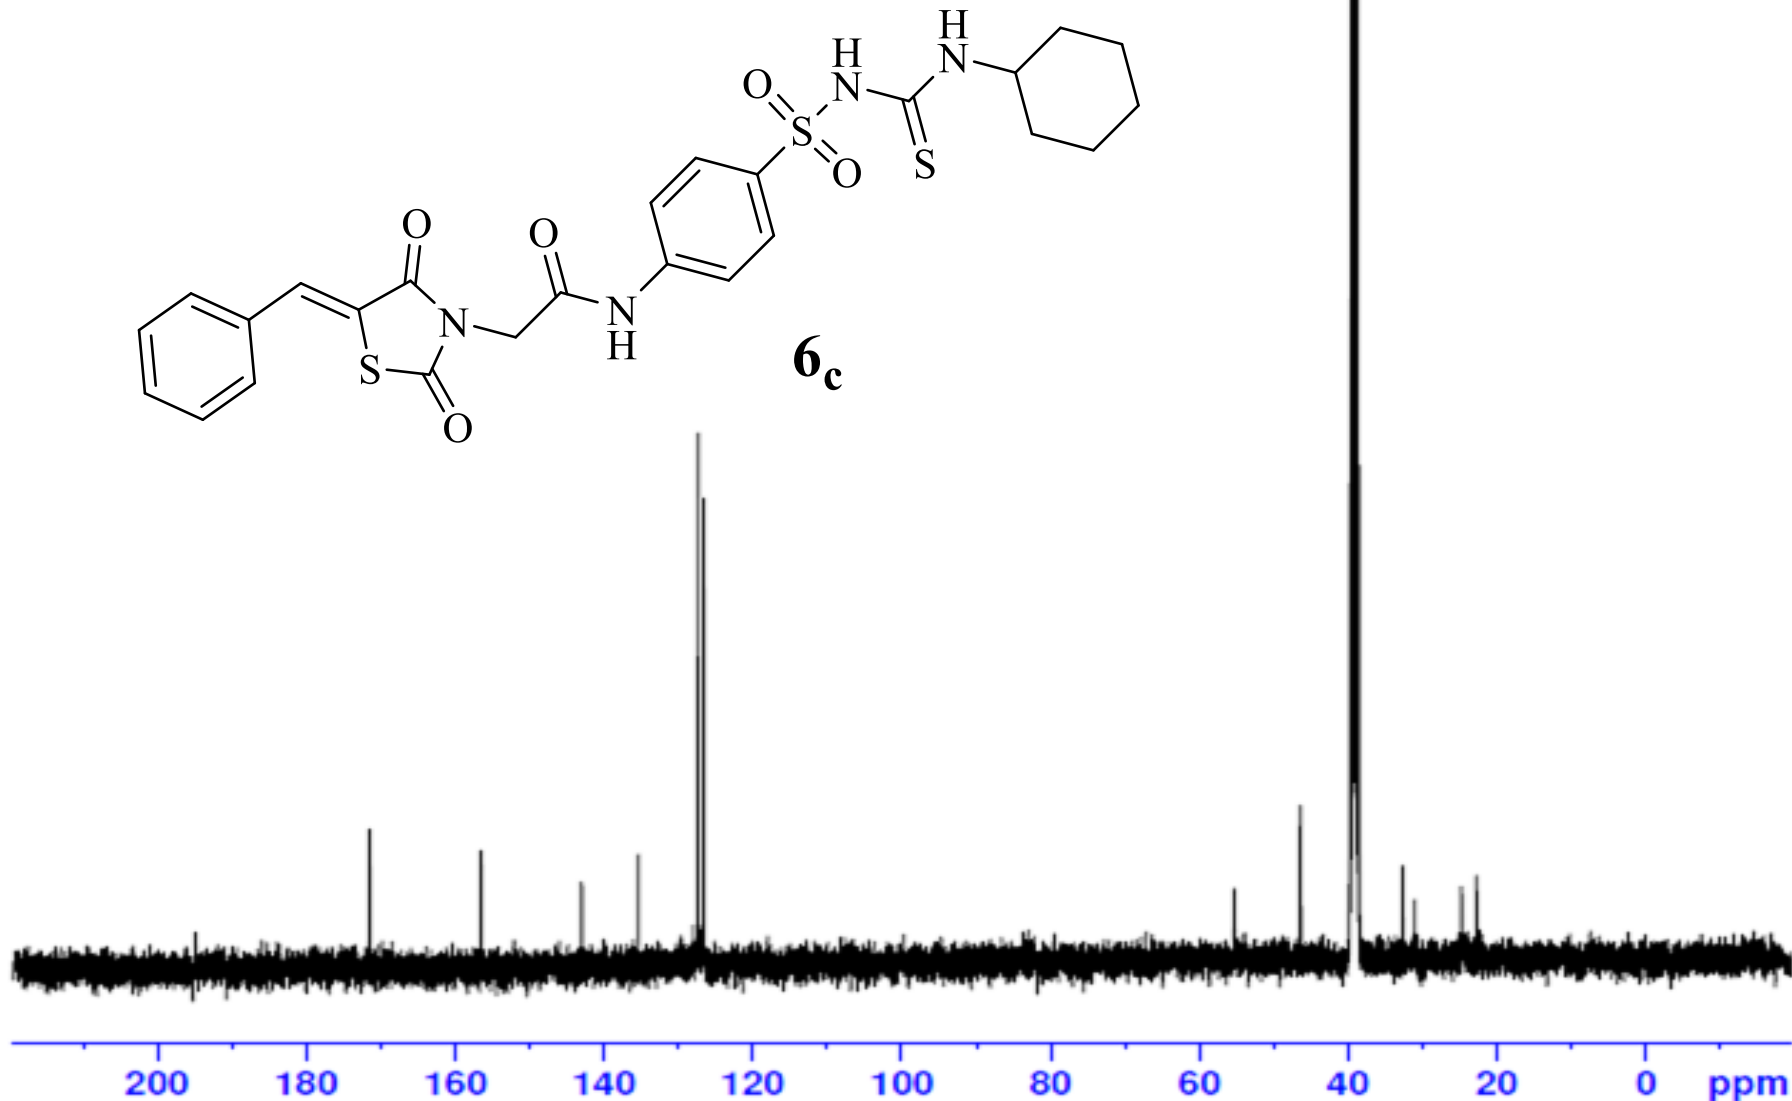

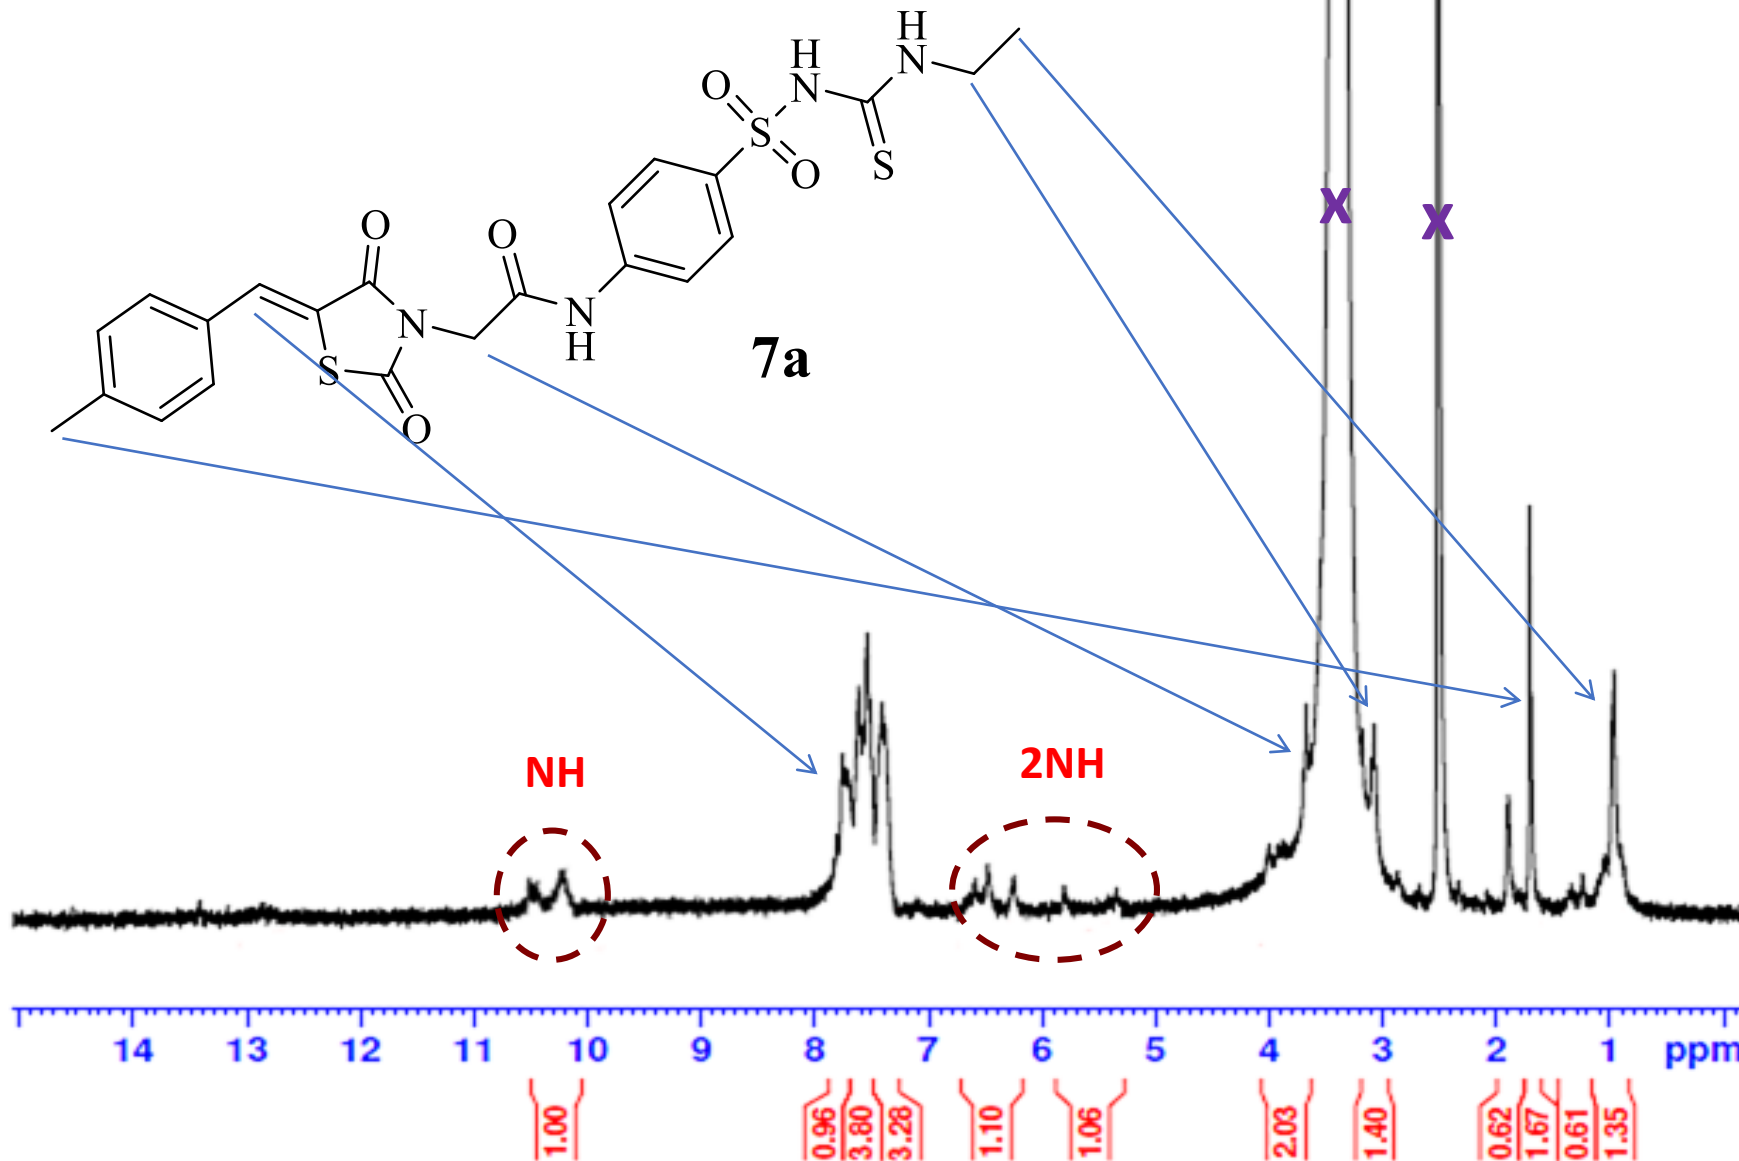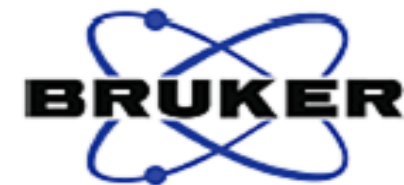

Current Data Parameters  
 NAME KE-A  
 EXPNO 1  
 PROCNO 1

F2 - Acquisition Parameters  
 Date\_ 20200817  
 Time 11.56  
 INSTRUM spect  
 PROBHD 5 mm PABBO BB/  
 PULPROG zg30  
 TD 65536  
 SOLVENT DMSO  
 NS 31  
 DS 2  
 SWH 8012.820 Hz  
 FIDRES 0.122266 Hz  
 AQ 4.0894465 sec  
 RG 205.37  
 DW 62.400 usec  
 DE 6.50 usec  
 TE 300.0 K  
 D1 1.00000000 sec  
 TDO 1

----- CHANNEL f1 -----  
 SFO1 400.1524711 MHz  
 NUC1 1H  
 P1 12.00 usec  
 PLW1 18.00000000 W

F2 - Processing parameters  
 SI 65536  
 SF 400.1500000 MHz  
 WDW EM  
 SSB 0  
 LB 0.30 Hz  
 GB 0  
 PC 1.00

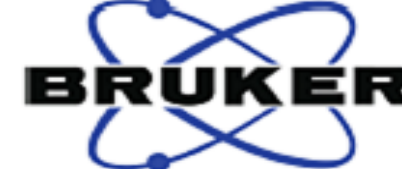

Current Data Parameters  
NAME KE-A-d2o  
EXPNO 1  
PROCNO 1

F2 - Acquisition Parameters  
Date\_ 20200818  
Time 10.05  
INSTRUM spect  
PROBHD 5 mm PABBO BB/  
PULPROG zg30  
TD 65536  
SOLVENT DMSO  
NS 85  
DS 2  
SWH 8012.820 Hz  
FIDRES 0.122266 Hz  
AQ 4.0894465 sec  
RG 205.37  
DW 62.400 usec  
DE 6.50 usec  
TE 300.0 K  
D1 1.00000000 sec  
TD0 1

----- CHANNEL f1 -----  
SFO1 400.1524711 MHz  
NUC1 1H  
P1 12.00 usec  
PLW1 18.00000000 W

F2 - Processing parameters  
SI 65536  
SF 400.1500000 MHz  
WDW EM  
SSB 0  
LB 0.30 Hz  
GB 0  
PC 1.00

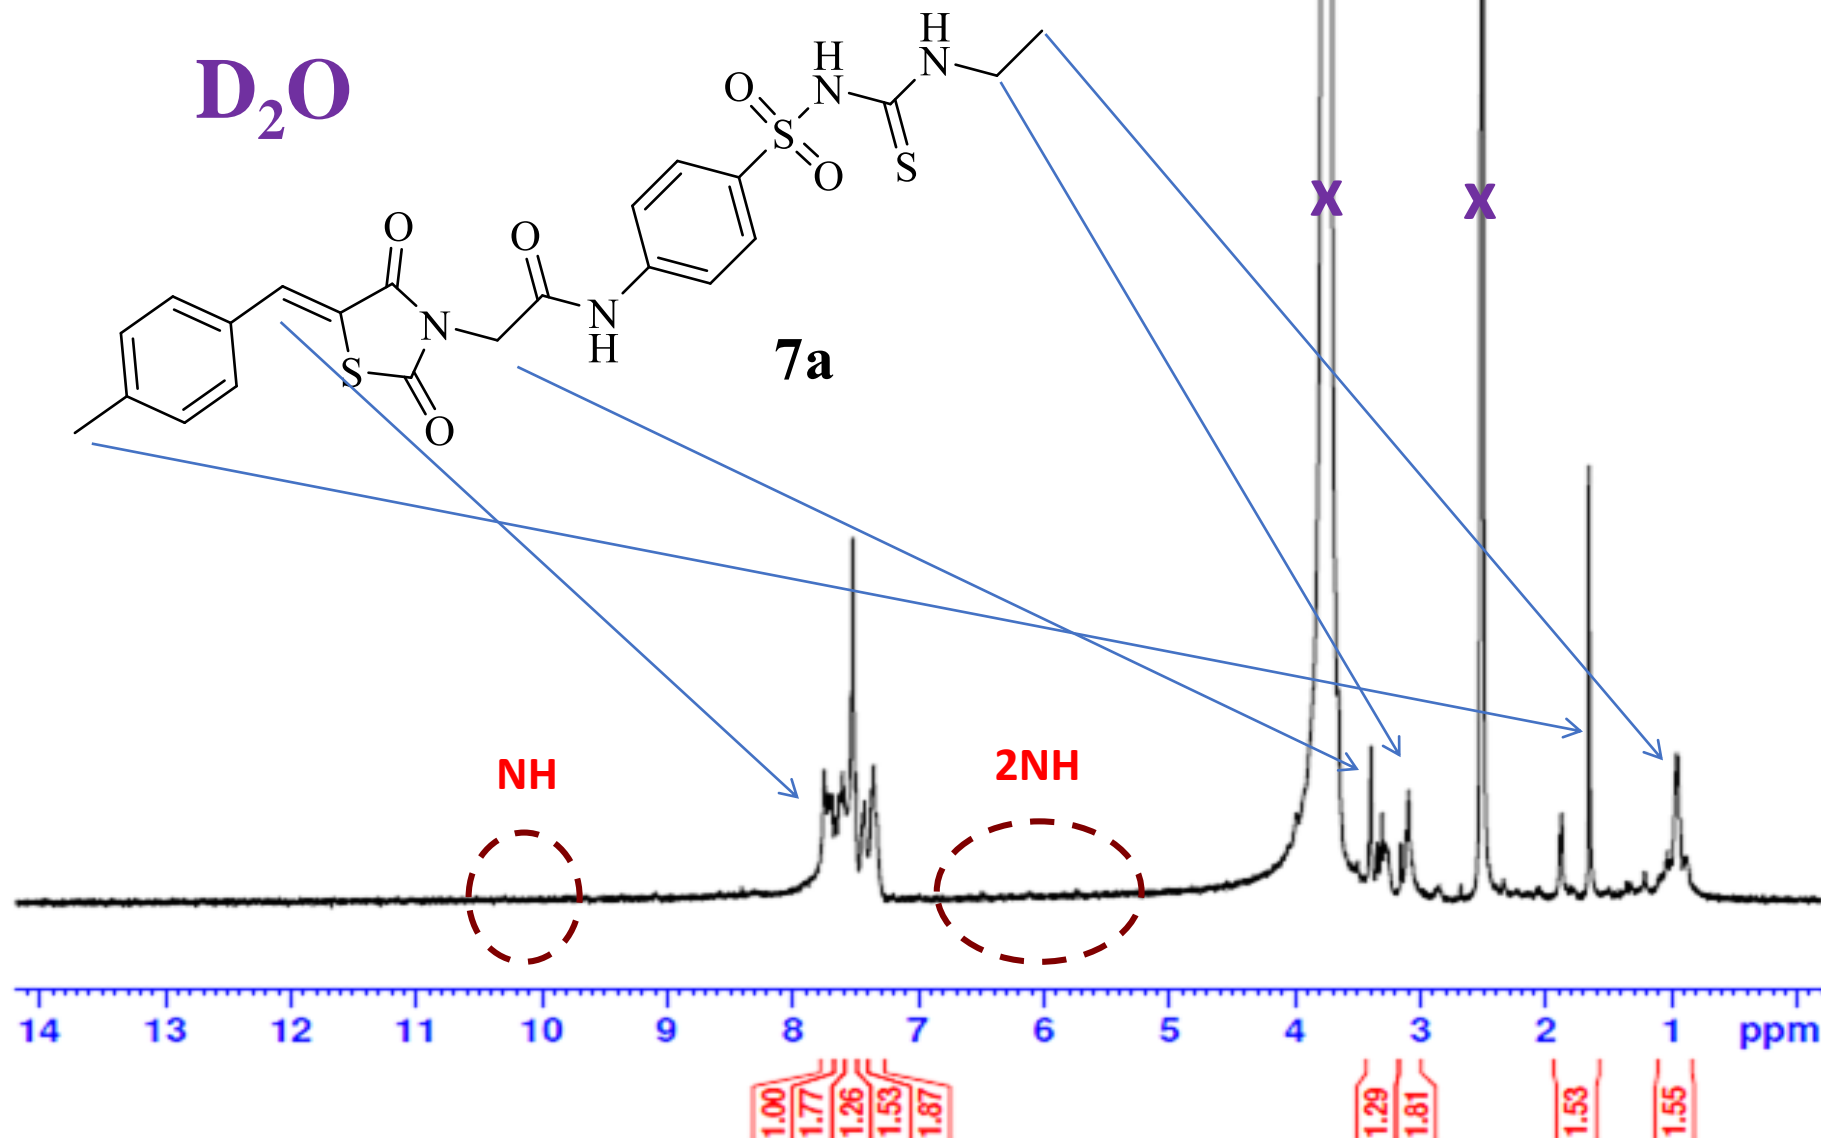

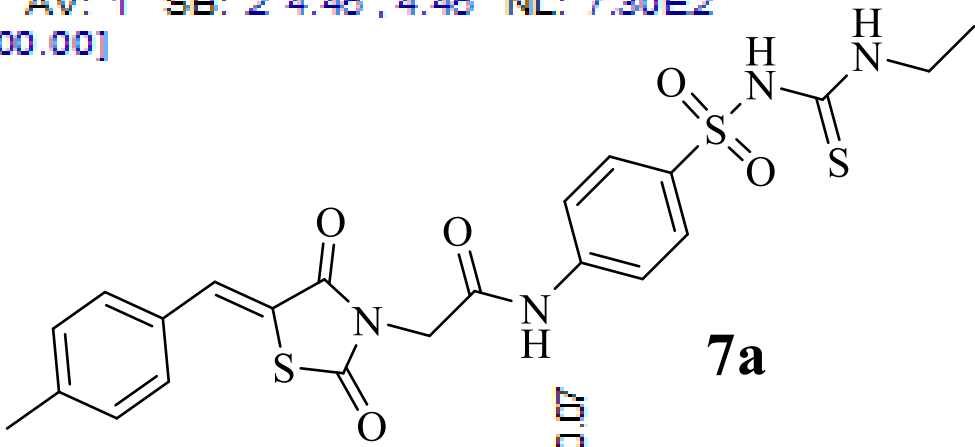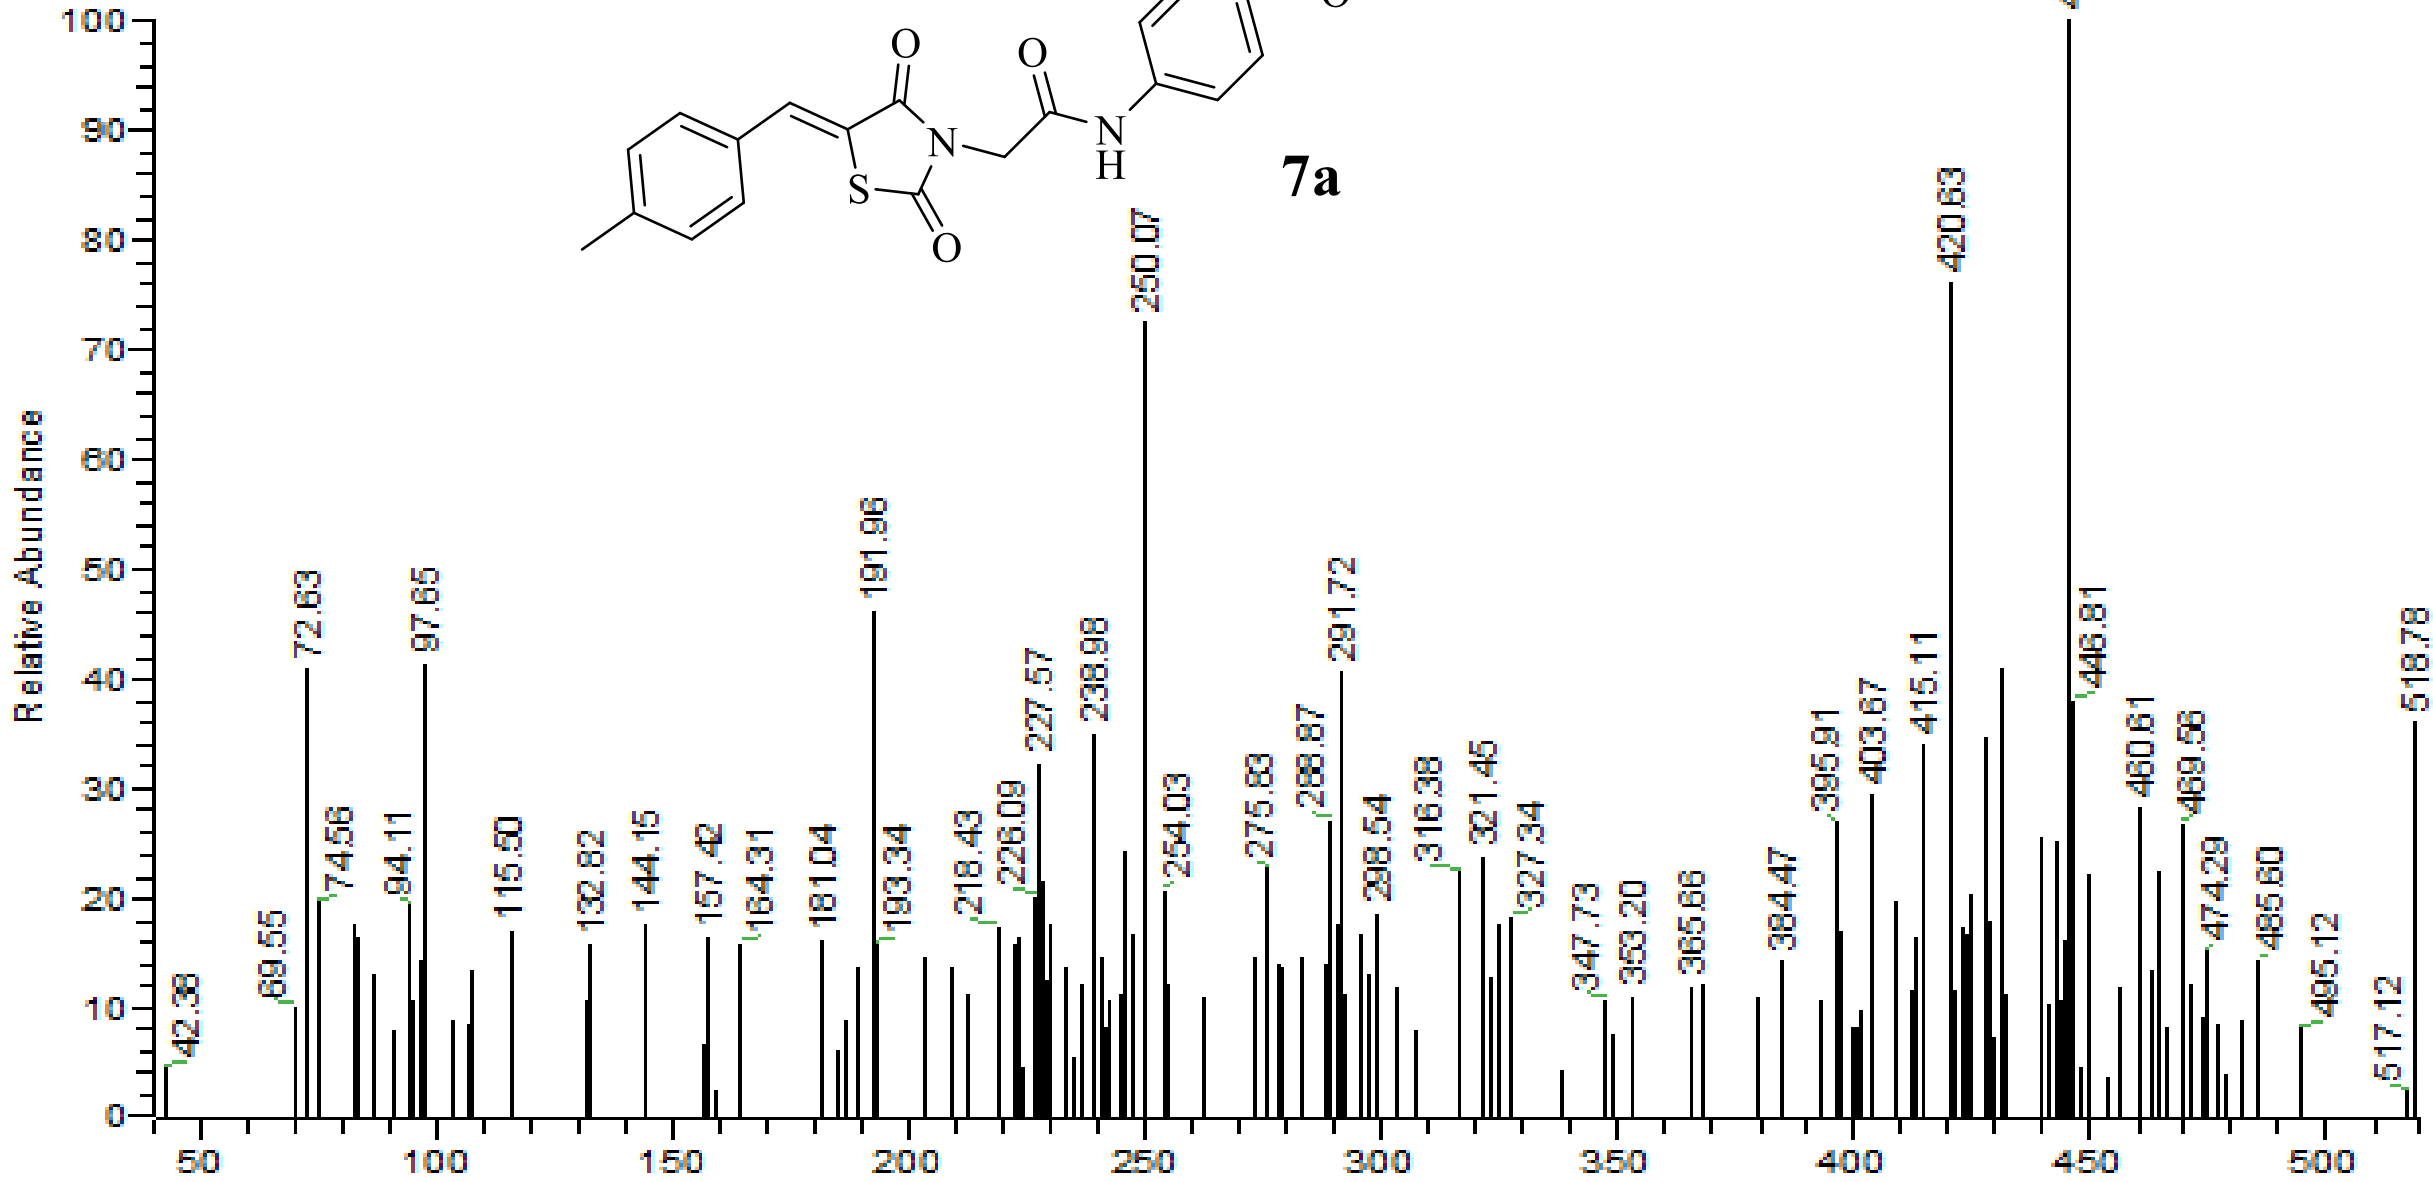



10.769  
10.000  
8.497  
7.935  
7.915  
7.628  
7.508  
7.493  
7.356  
7.300  
7.276  
7.175  
7.151  
7.088  
7.070  
7.060  
7.030  
7.005  
6.985  
6.941  
6.926  
6.910  
6.881  
6.824  
6.796  
6.744  
6.729  
6.706  
6.581  
6.561  
6.506  
6.489  
6.473  
3.979  
3.898  
3.419  
3.196  
2.515  
2.340

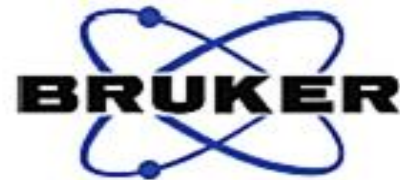

Current Data Parameters  
NAME KE-C  
EXPNO 1  
PROCNO 1

F2 - Acquisition Parameters  
Date\_ 20200817  
Time 11.45  
INSTRUM spect  
PROBHD 5 mm PABBO BB/  
PULPROG zg30  
TD 65536  
SOLVENT DMSO  
NS 44  
DS 2  
SWH 8012.820 Hz  
FIDRES 0.122266 Hz  
AQ 4.0894465 sec  
RG 205.37  
DW 62.400 usec  
DE 6.50 usec  
TE 300.0 K  
D1 1.00000000 sec  
TD0 1

----- CHANNEL f1 -----  
SFO1 400.1524711 MHz  
NUC1 1H  
P1 12.00 usec  
PLW1 18.00000000 W

F2 - Processing parameters  
SI 65536  
SF 400.1500000 MHz  
WDW EM  
SSB 0  
LB 0.30 Hz  
GB 0  
PC 1.00

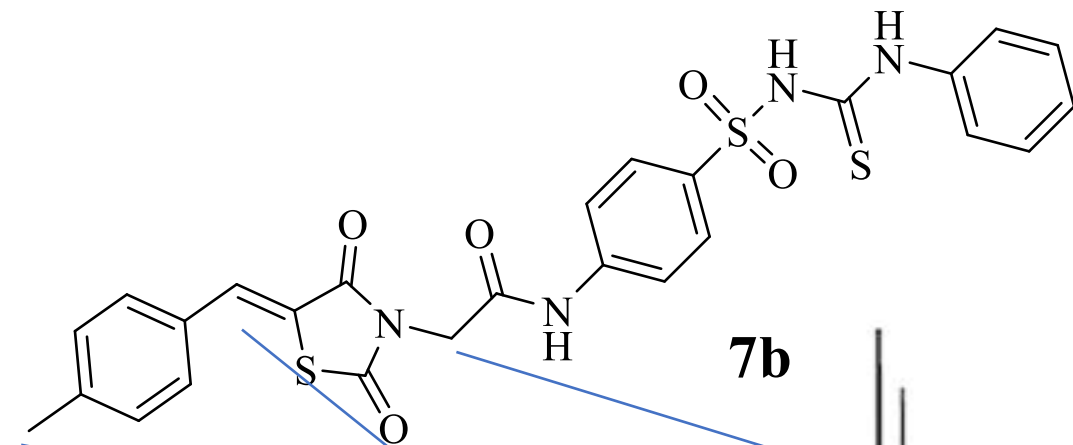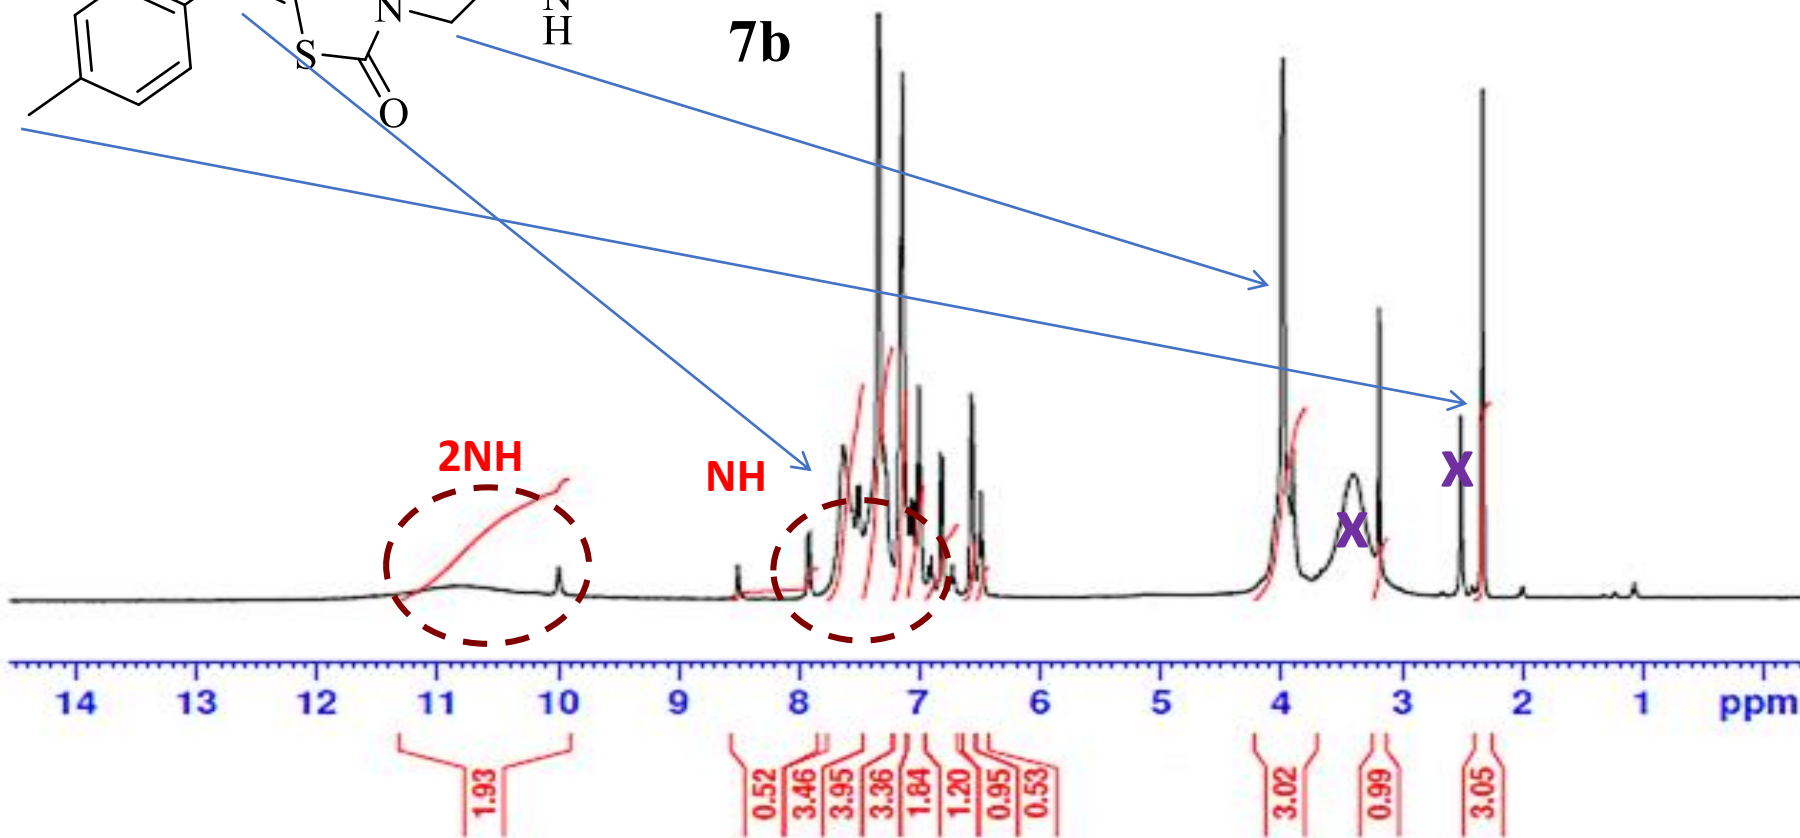

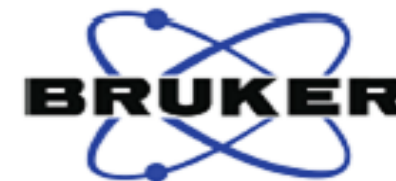

Current Data Parameters  
NAME KE-C-d2o  
EXPNO 1  
PROCNO 1

F2 - Acquisition Parameters  
Date\_ 20200818  
Time 9.47  
INSTRUM spect  
PROBHD 5 mm PABBO BB/  
PULPROG zg30  
TD 65536  
SOLVENT DMSO  
NS 40  
DS 2  
SWH 8012.820 Hz  
FIDRES 0.122266 Hz  
AQ 4.0894465 sec  
RG 205.37  
DW 62.400 usec  
DE 6.50 usec  
TE 300.0 K  
D1 1.00000000 sec  
TD0 1

----- CHANNEL f1 -----  
SFO1 400.1524711 MHz  
NUC1 1H  
P1 12.00 usec  
PLW1 18.00000000 W

F2 - Processing parameters  
SI 65536  
SF 400.150000 MHz  
WDW EM  
SSB 0  
LB 0.30 Hz  
GB 0  
PC 1.00

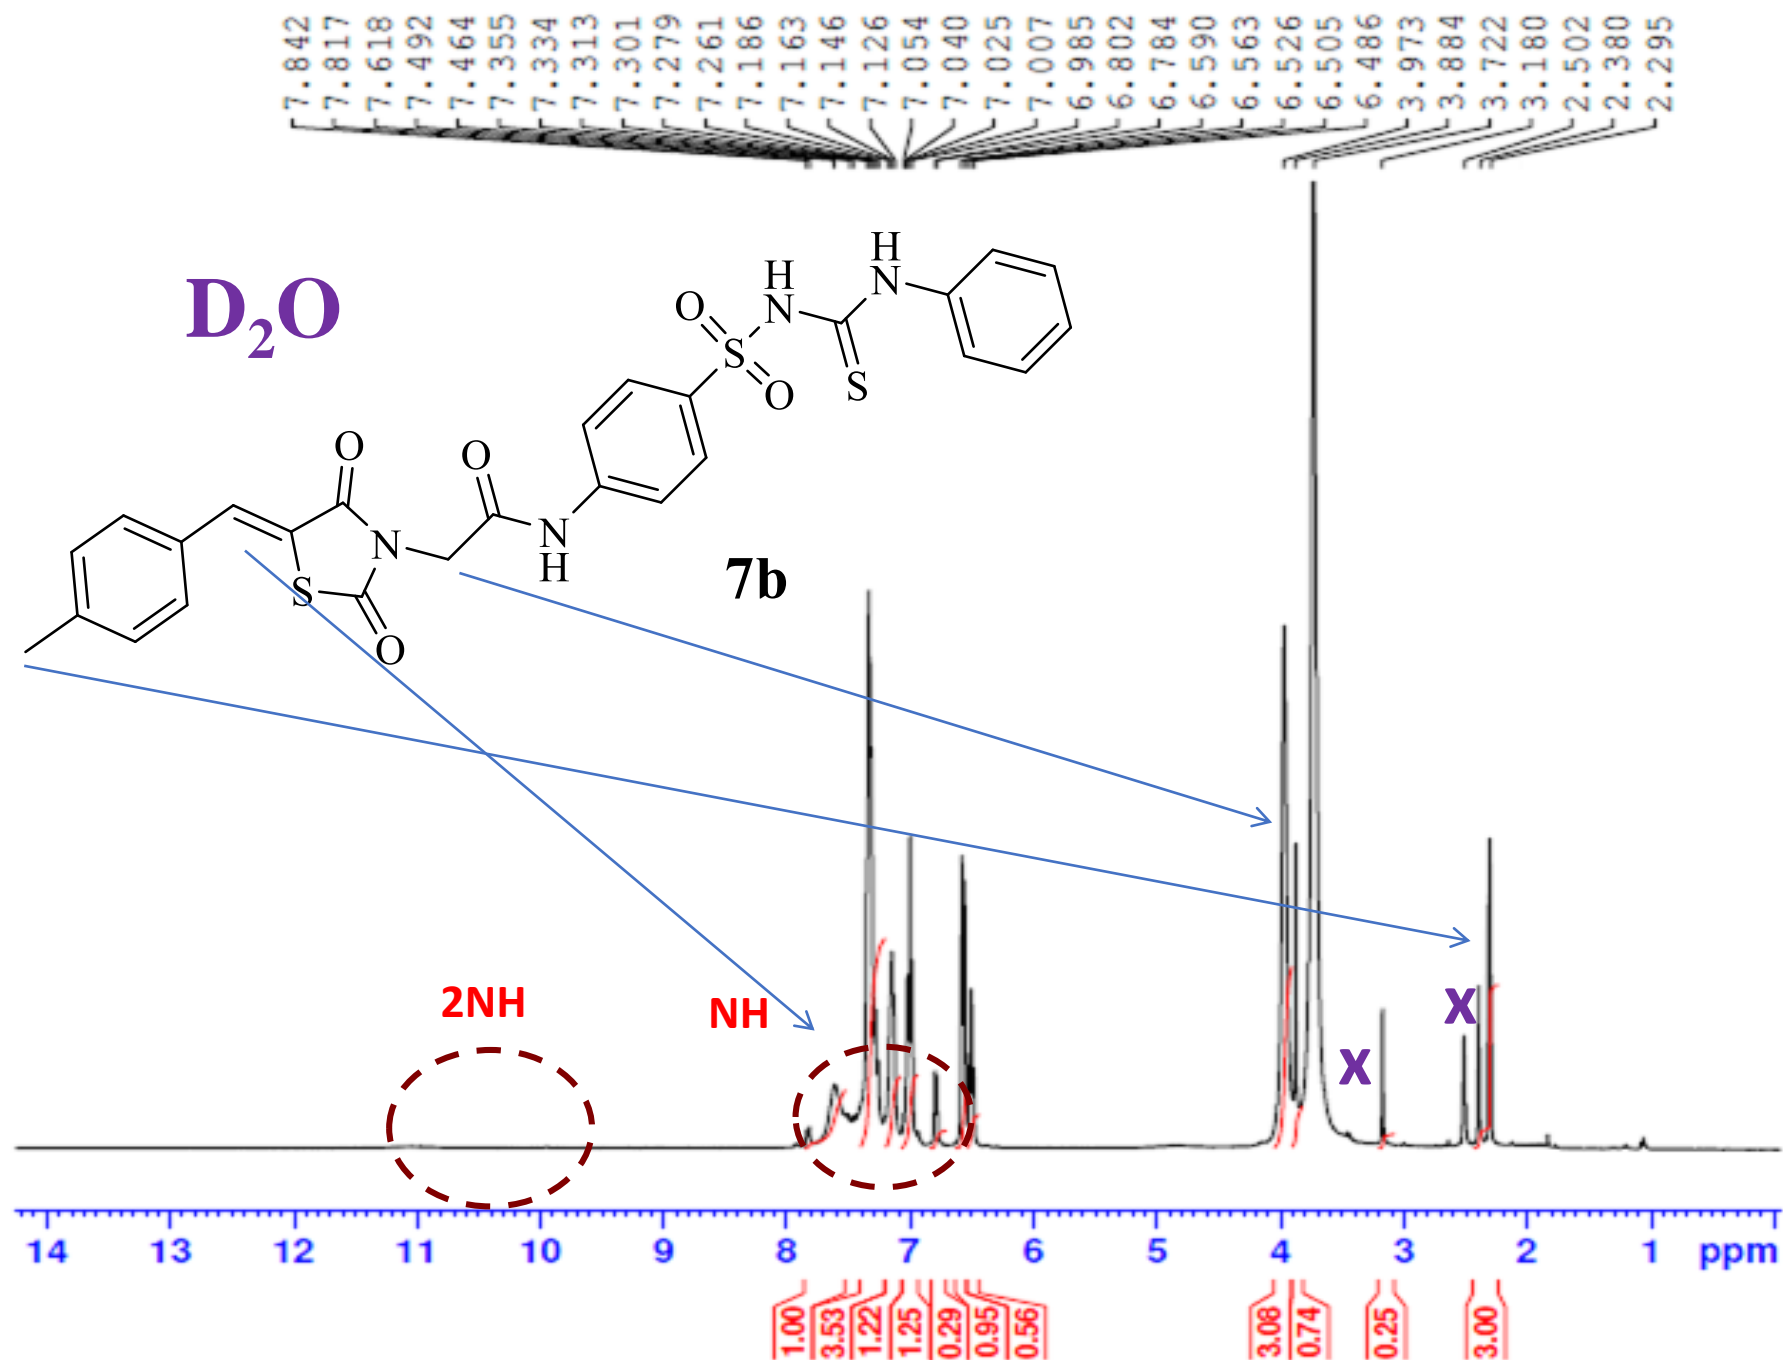

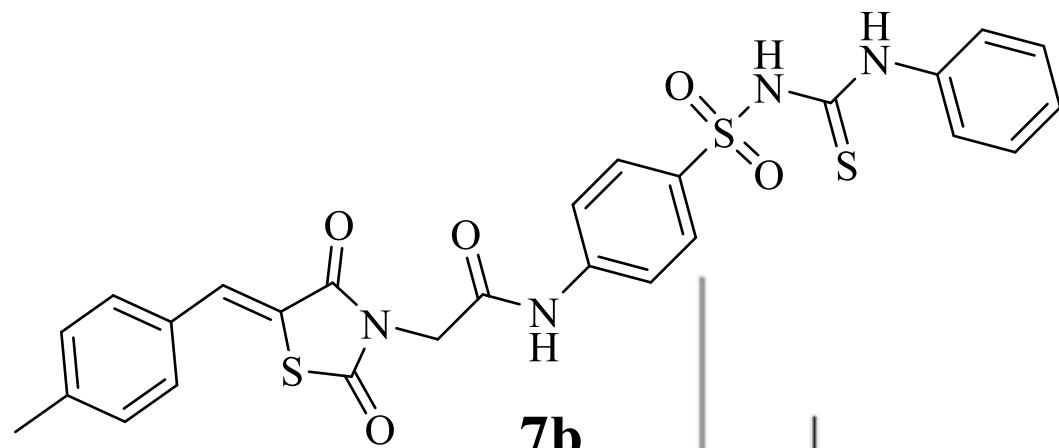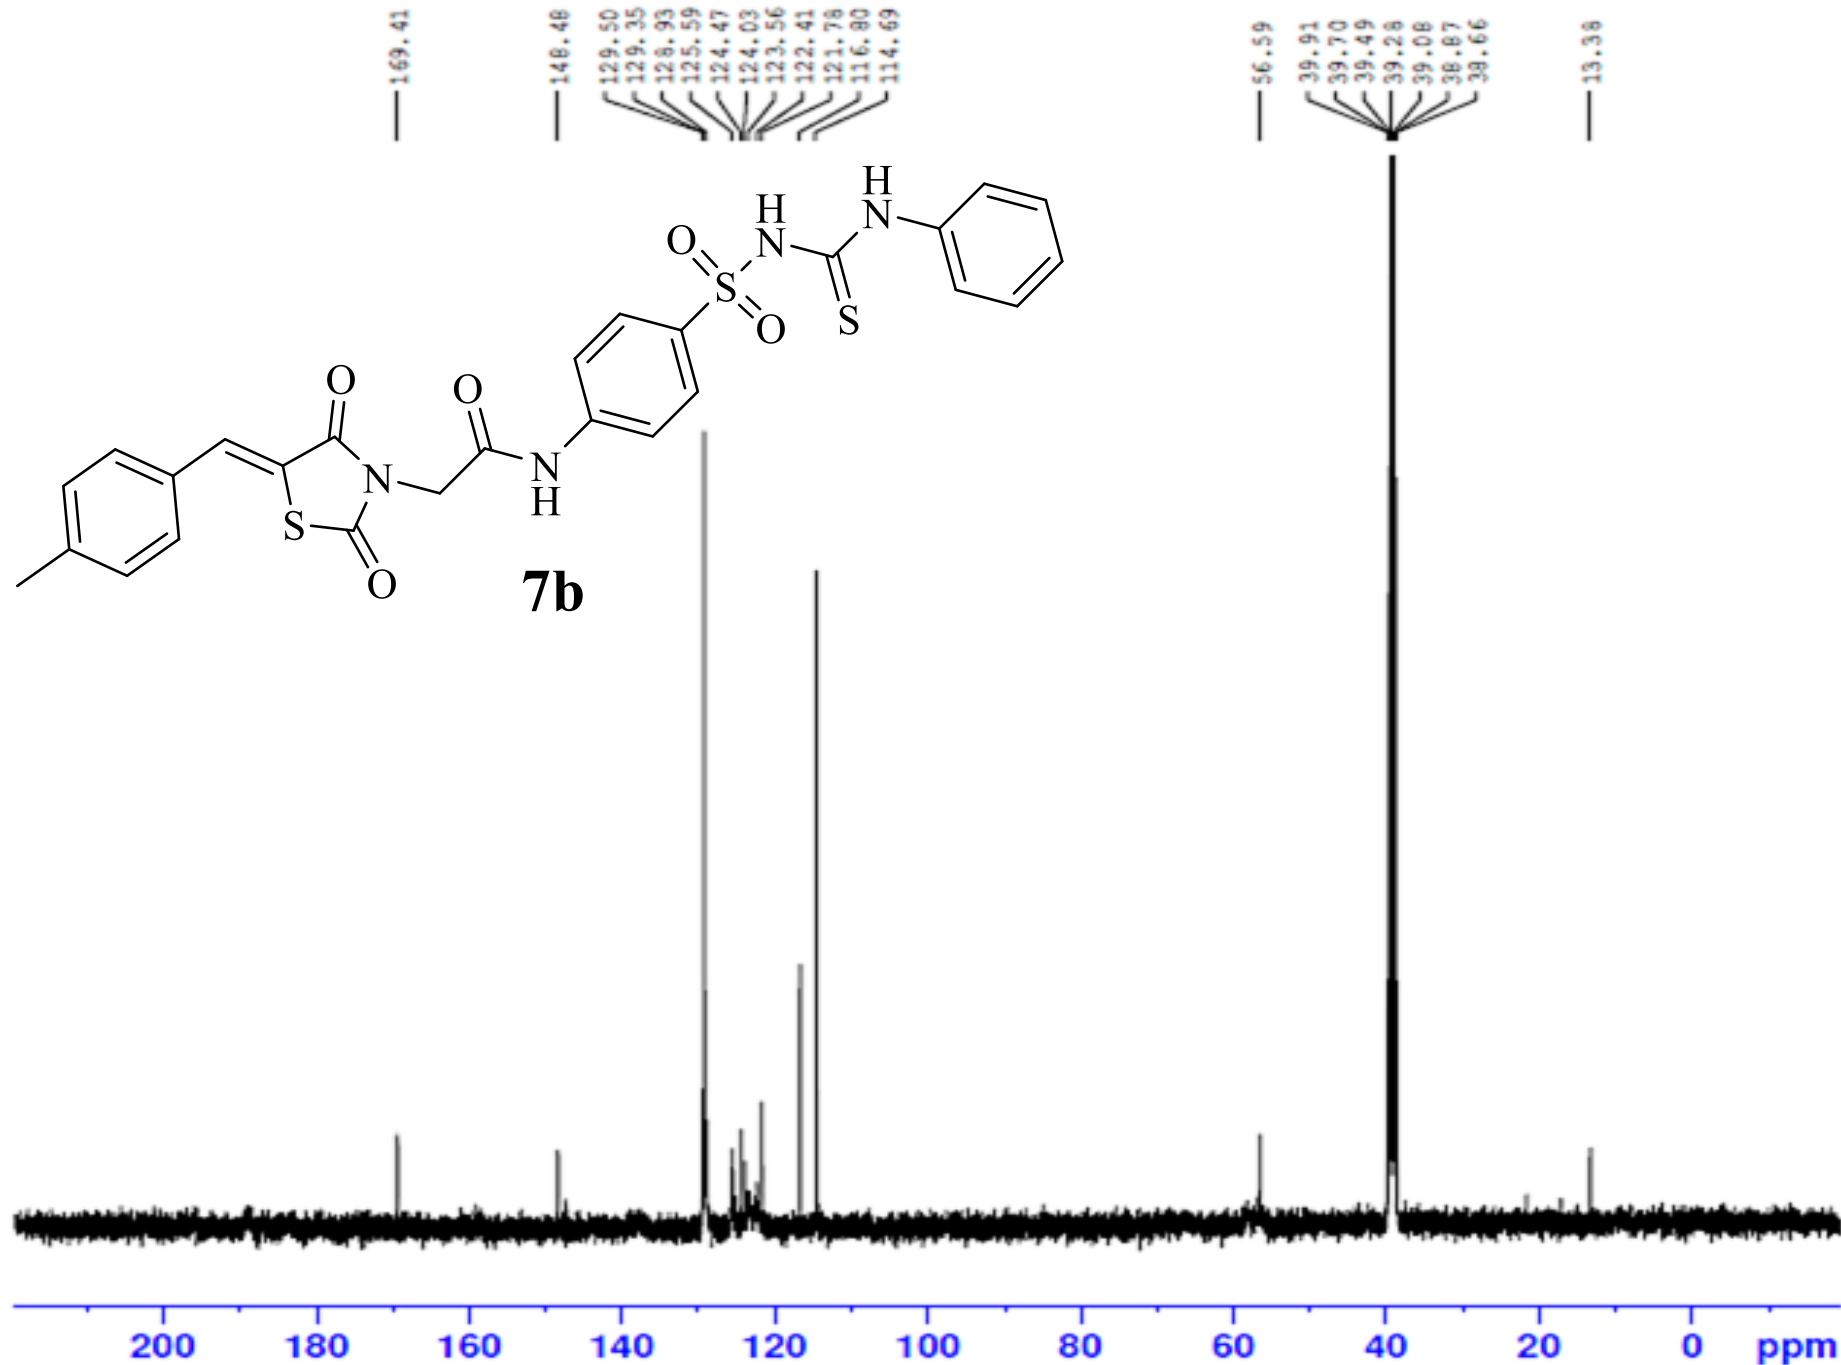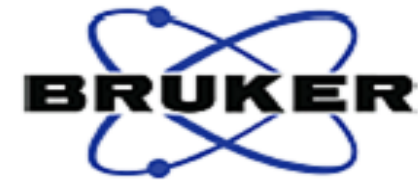

#### Current Data Parameters

NAME KE-C  
EXPNO 2  
PROCNO 1

#### F2 - Acquisition Parameters

Date\_ 20200921  
Time 12.54  
INSTRUM spect  
PROBHD 5 mm PABBO BB/  
PULPROG zgpg30  
TD 65536  
SOLVENT DMSO  
NS 954  
DS 4  
SWH 24038.461 Hz  
FIDRES 0.366798 Hz  
AQ 1.3631488 sec  
RG 205.37  
DW 20.800 usec  
DE 6.50 usec  
TE 300.0 K  
D1 2.00000000 sec  
D11 0.03000000 sec  
TD0 1

#### ----- CHANNEL f1 -----

SFO1 100.6278588 MHz  
NUC1 13C  
P1 10.00 usec  
PLW1 47.00000000 W

#### ----- CHANNEL f2 -----

SFO2 400.1516006 MHz  
NUC2 1H  
CPDPRG[2] waltz16  
PCPD2 90.00 usec  
PLW2 18.00000000 W  
PLW12 0.34722000 W  
PLW13 0.28125000 W

#### F2 - Processing parameters

SI 32768  
SF 100.6177975 MHz  
WDW EM  
SSB 0  
LB 1.00 Hz  
GB 0  
PC 1.40

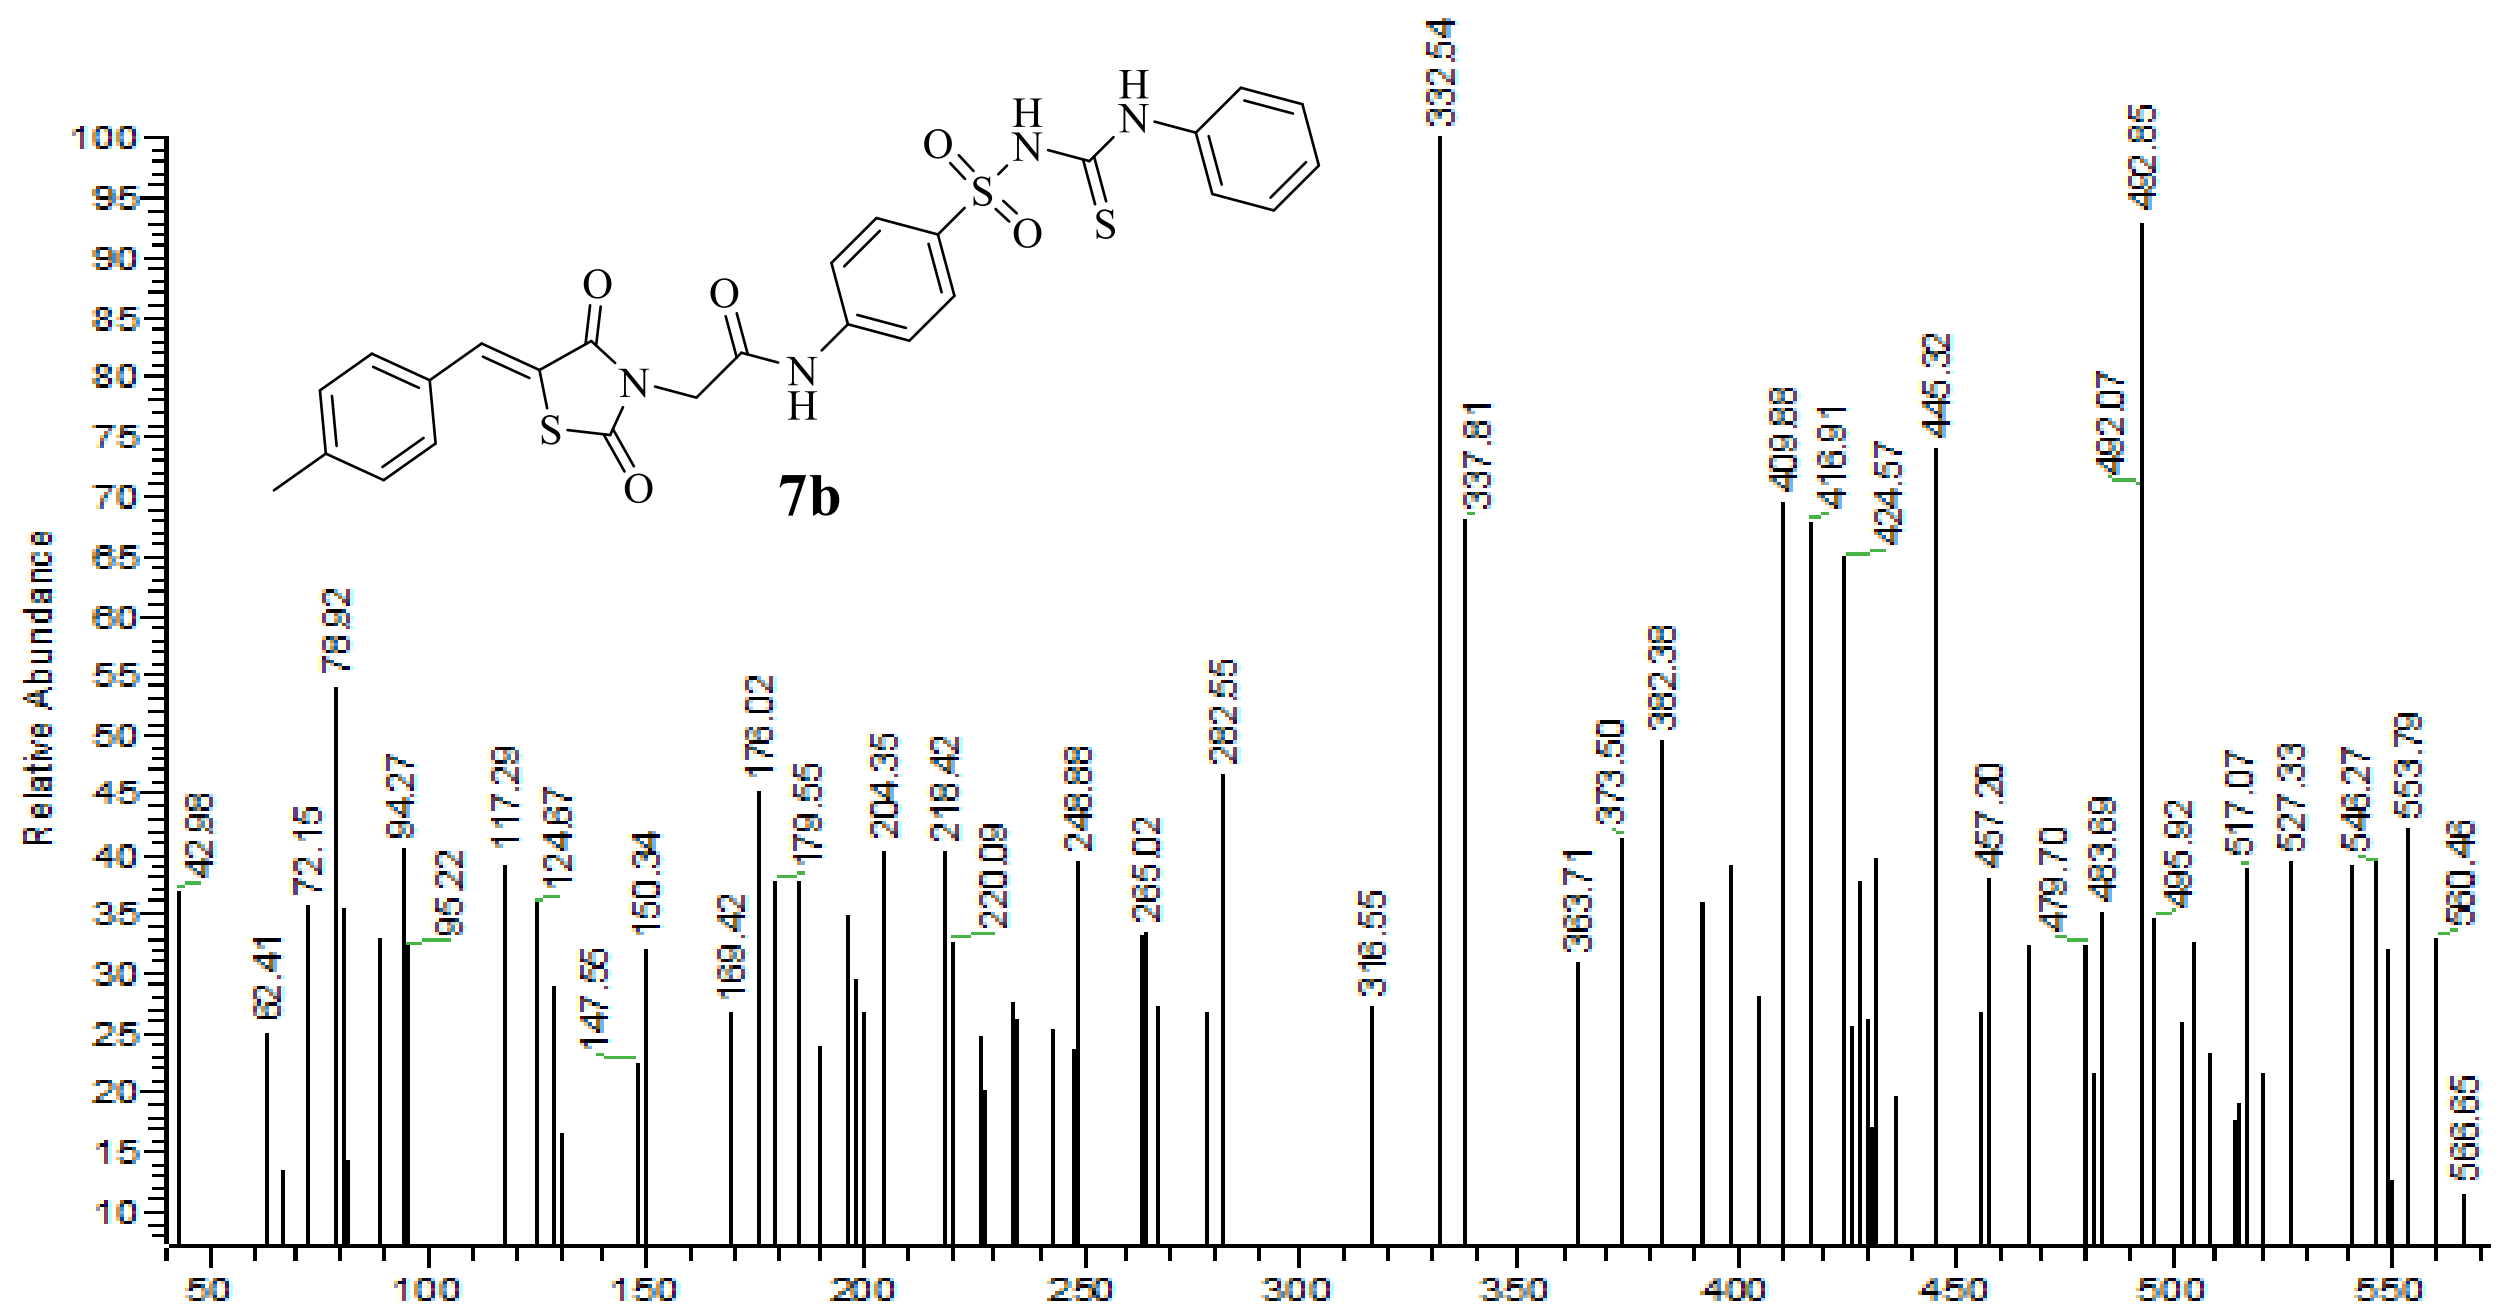

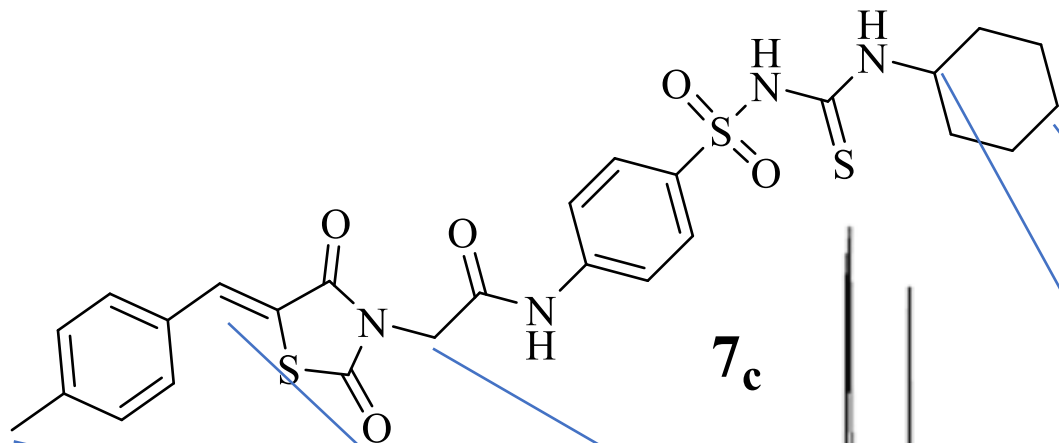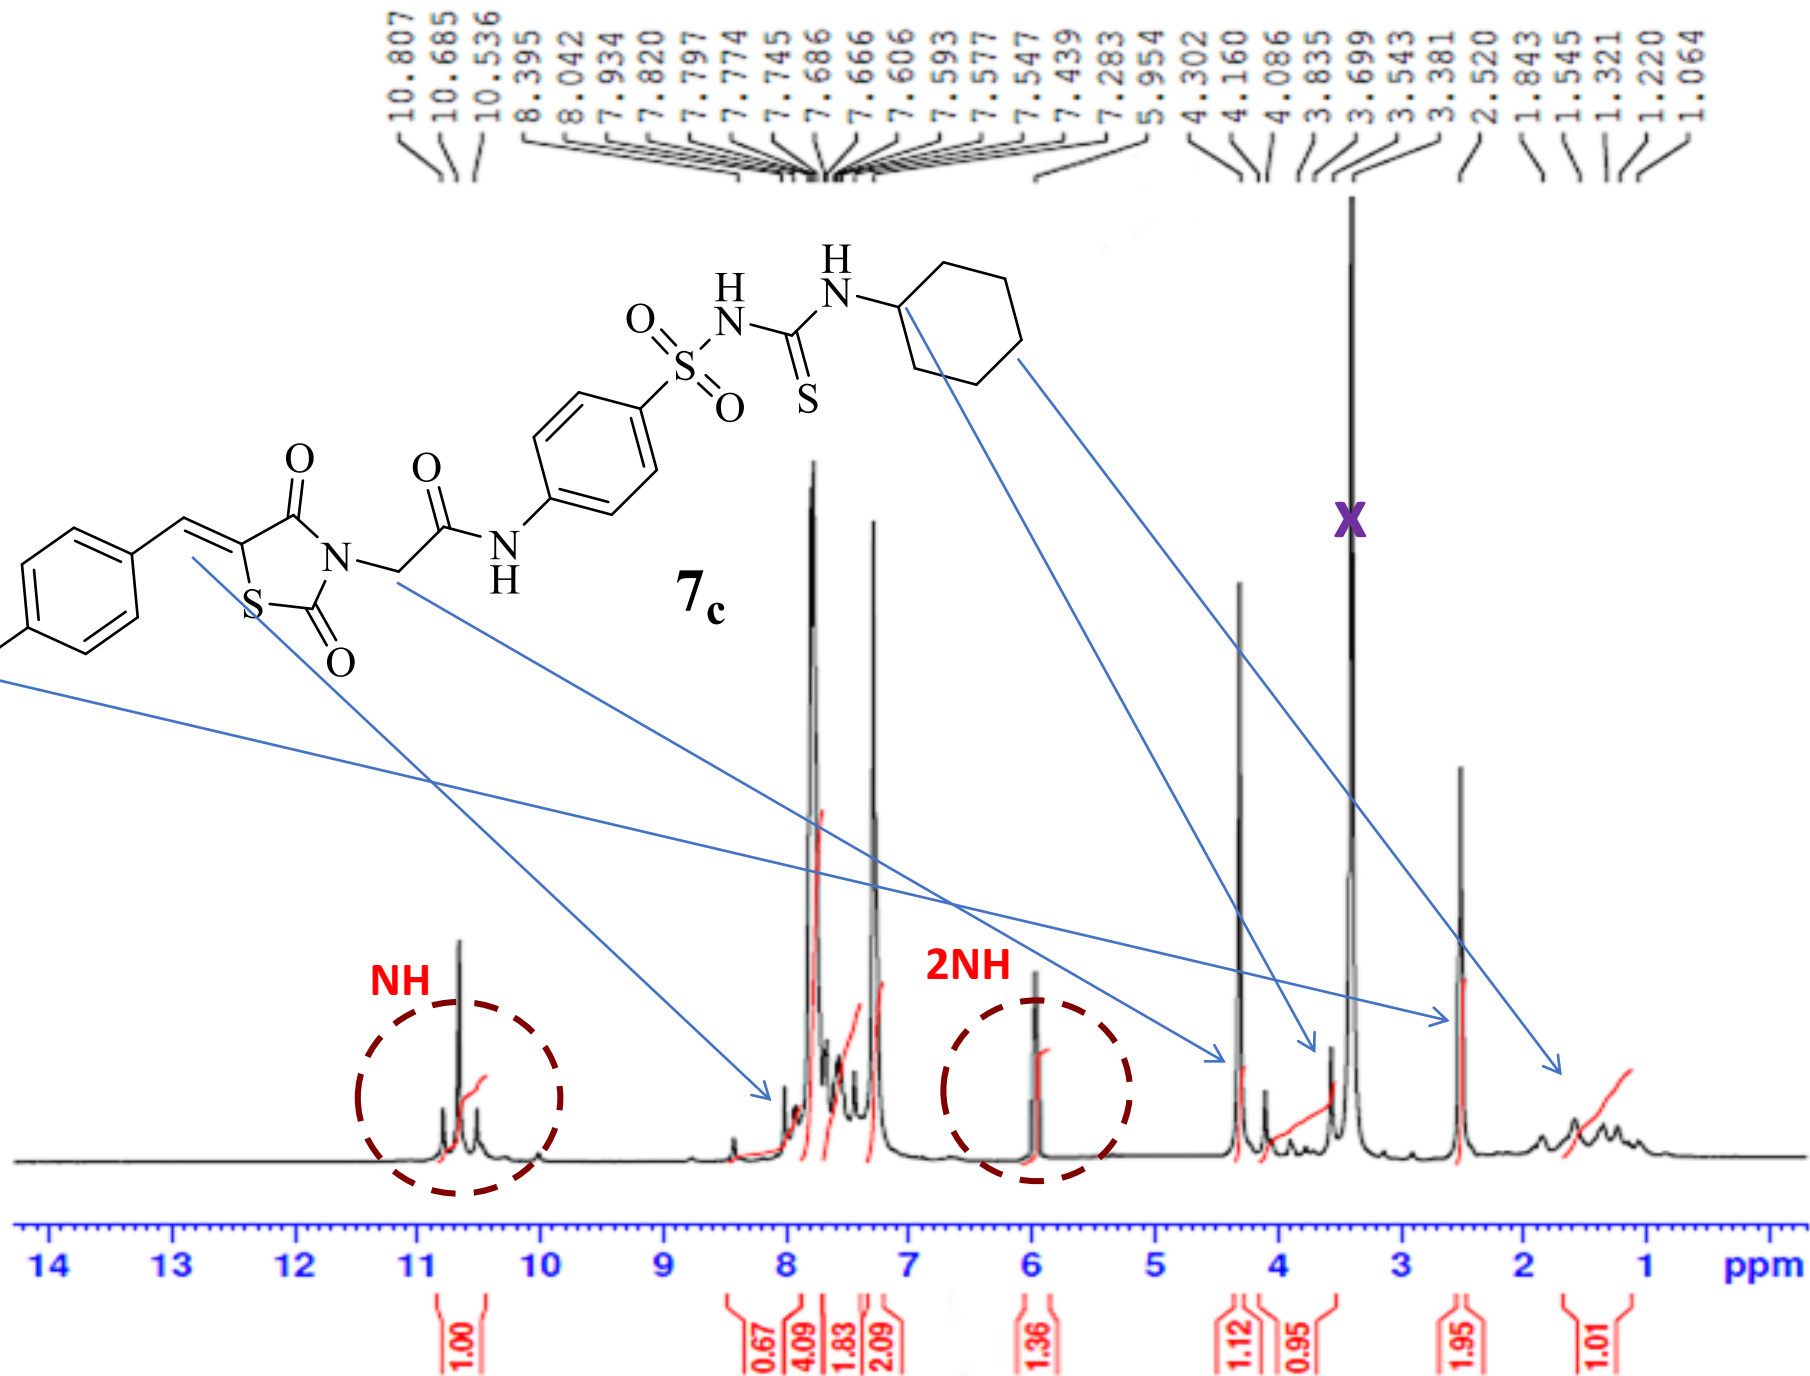

```
Current Data Parameters
NAME                      KE-E
EXPNO                      1
PROCNO                     1
```

```

F2 - Acquisition Parameters
Date_          20200817
Time           11.23
INSTRUM       spect
PROBHD        5 mm PABBO BB/
PULPROG       zg30
ID            65536
SOLVENT       DMSO
NS            59
DS            2
SWH           8012.820 Hz
FIDRES        0.122266 Hz
AQ            4.0894465 sec
RG            205.37
DW            62.400 usec
DE            6.50 usec
TE            300.0 K
D1            1.00000000 sec
TD0           1

```

```
----- CHANNEL f1 -----
SFO1      400.1524711 MHz
NUC1              1H
P1              12.00 usec
PLW1      18.00000000 W
```

```
F2 - Processing parameters
SI                      65536
SF                      400.1500000 MHz
WDW                      EM
SSB                      0
LB                      0.30 Hz
GB                      0
PC                      1.00
```



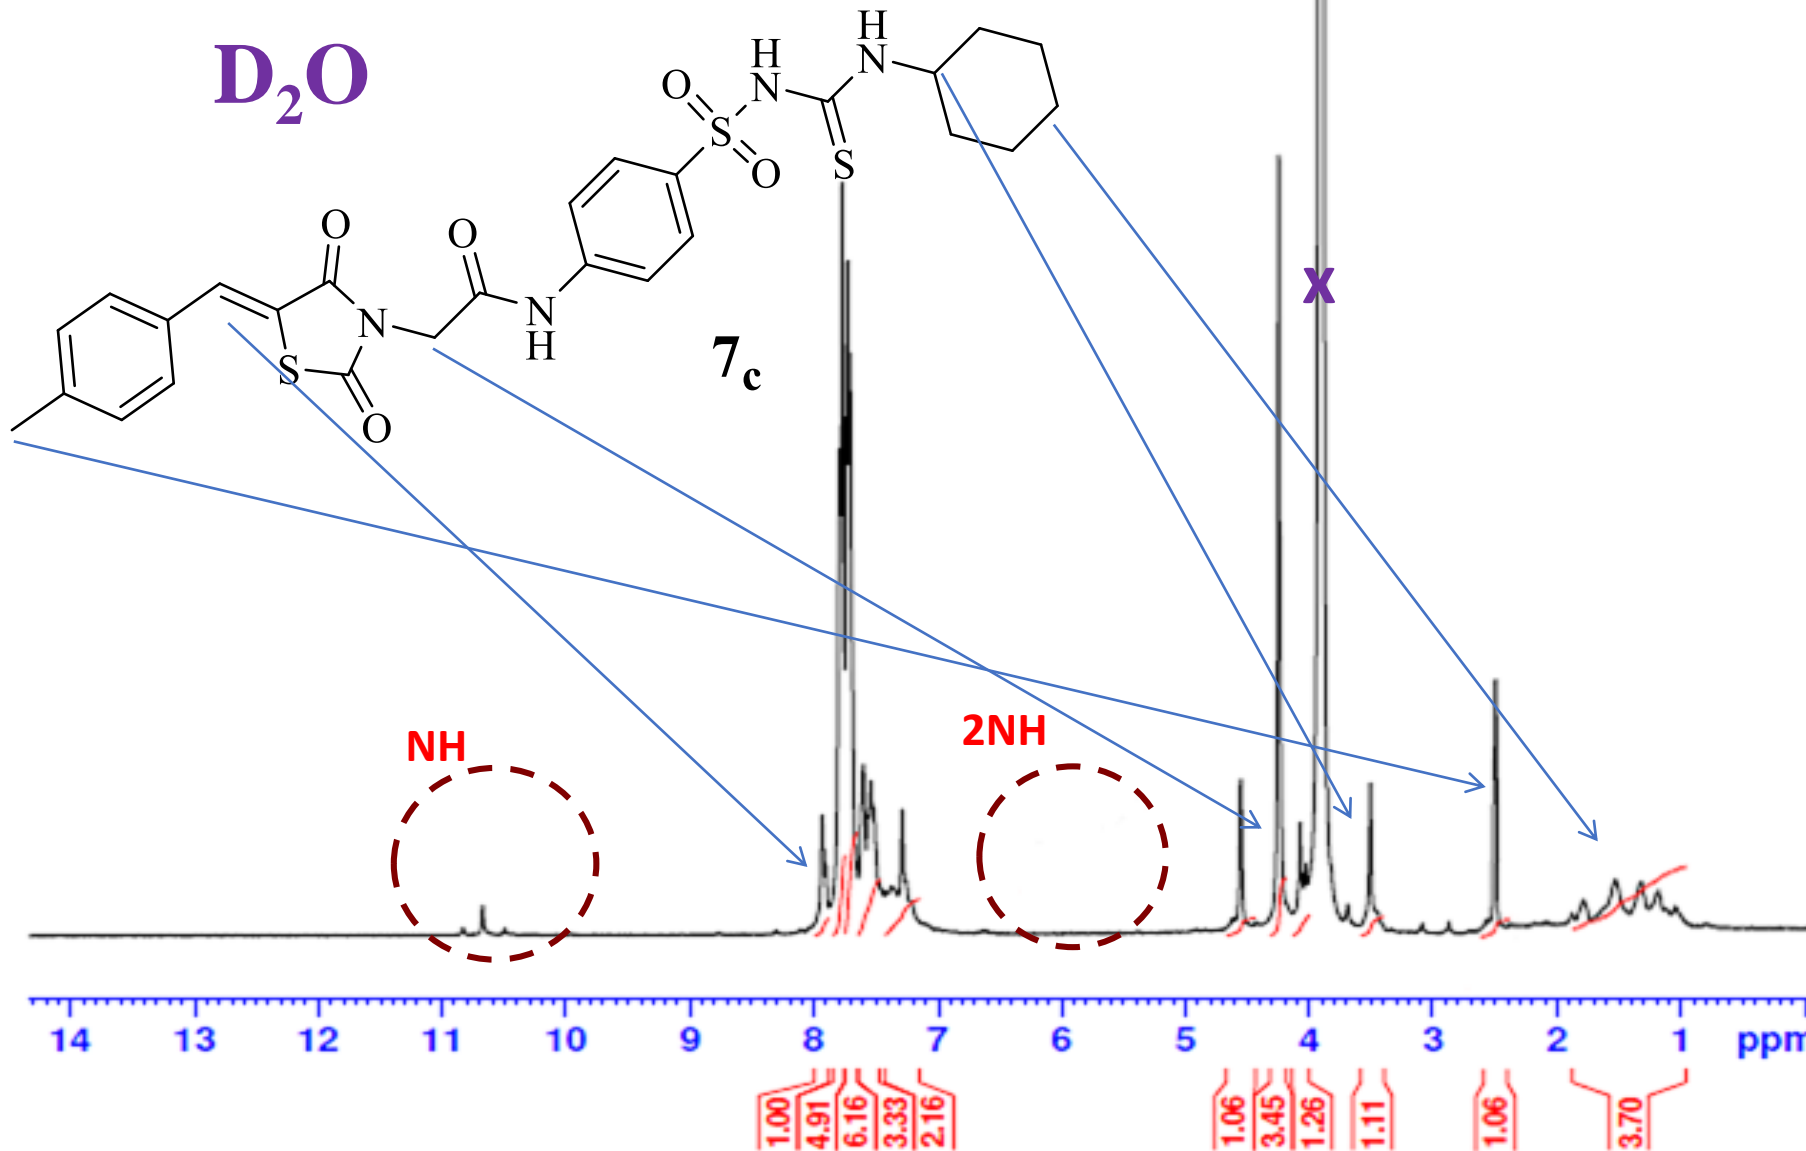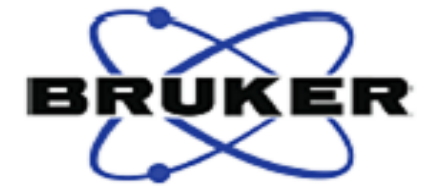

Current Data Parameters  
NAME KE-E-d2o  
EXPNO 1  
PROCNO 1

F2 - Acquisition Parameters  
Date\_ 20200818  
Time 8.56  
INSTRUM spect  
PROBHD 5 mm PABBO BB/  
PULPROG zg30  
TD 65536  
SOLVENT DMSO  
NS 37  
DS 2  
SWH 8012.820 Hz  
FIDRES 0.122266 Hz  
AQ 4.0894465 sec  
RG 205.37  
DW 62.400 usec  
DE 6.50 usec  
TE 300.0 K  
D1 1.00000000 sec  
TD0 1

----- CHANNEL f1 -----  
SFO1 400.1524711 MHz  
NUC1 1H  
P1 12.00 usec  
PLW1 18.00000000 W

F2 - Processing parameters  
SI 65536  
SF 400.1500000 MHz  
WDW EM  
SSB 0  
LB 0.30 Hz  
GB 0  
PC 1.00

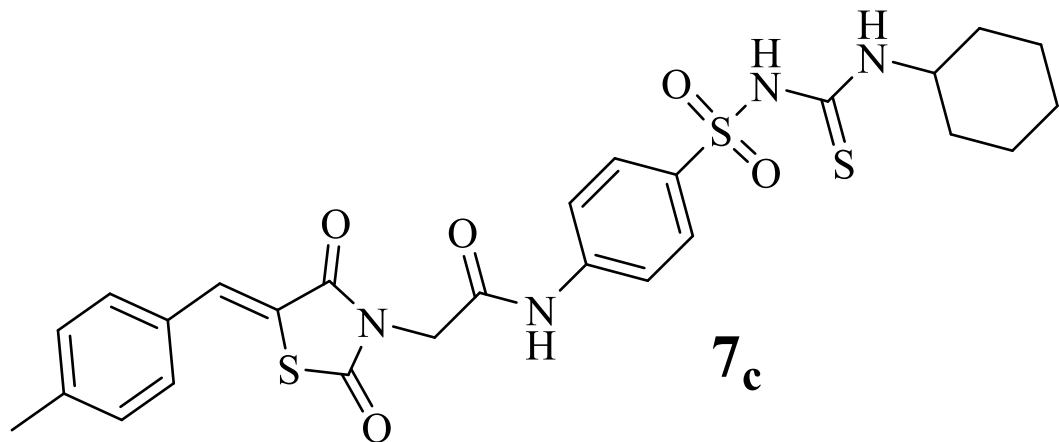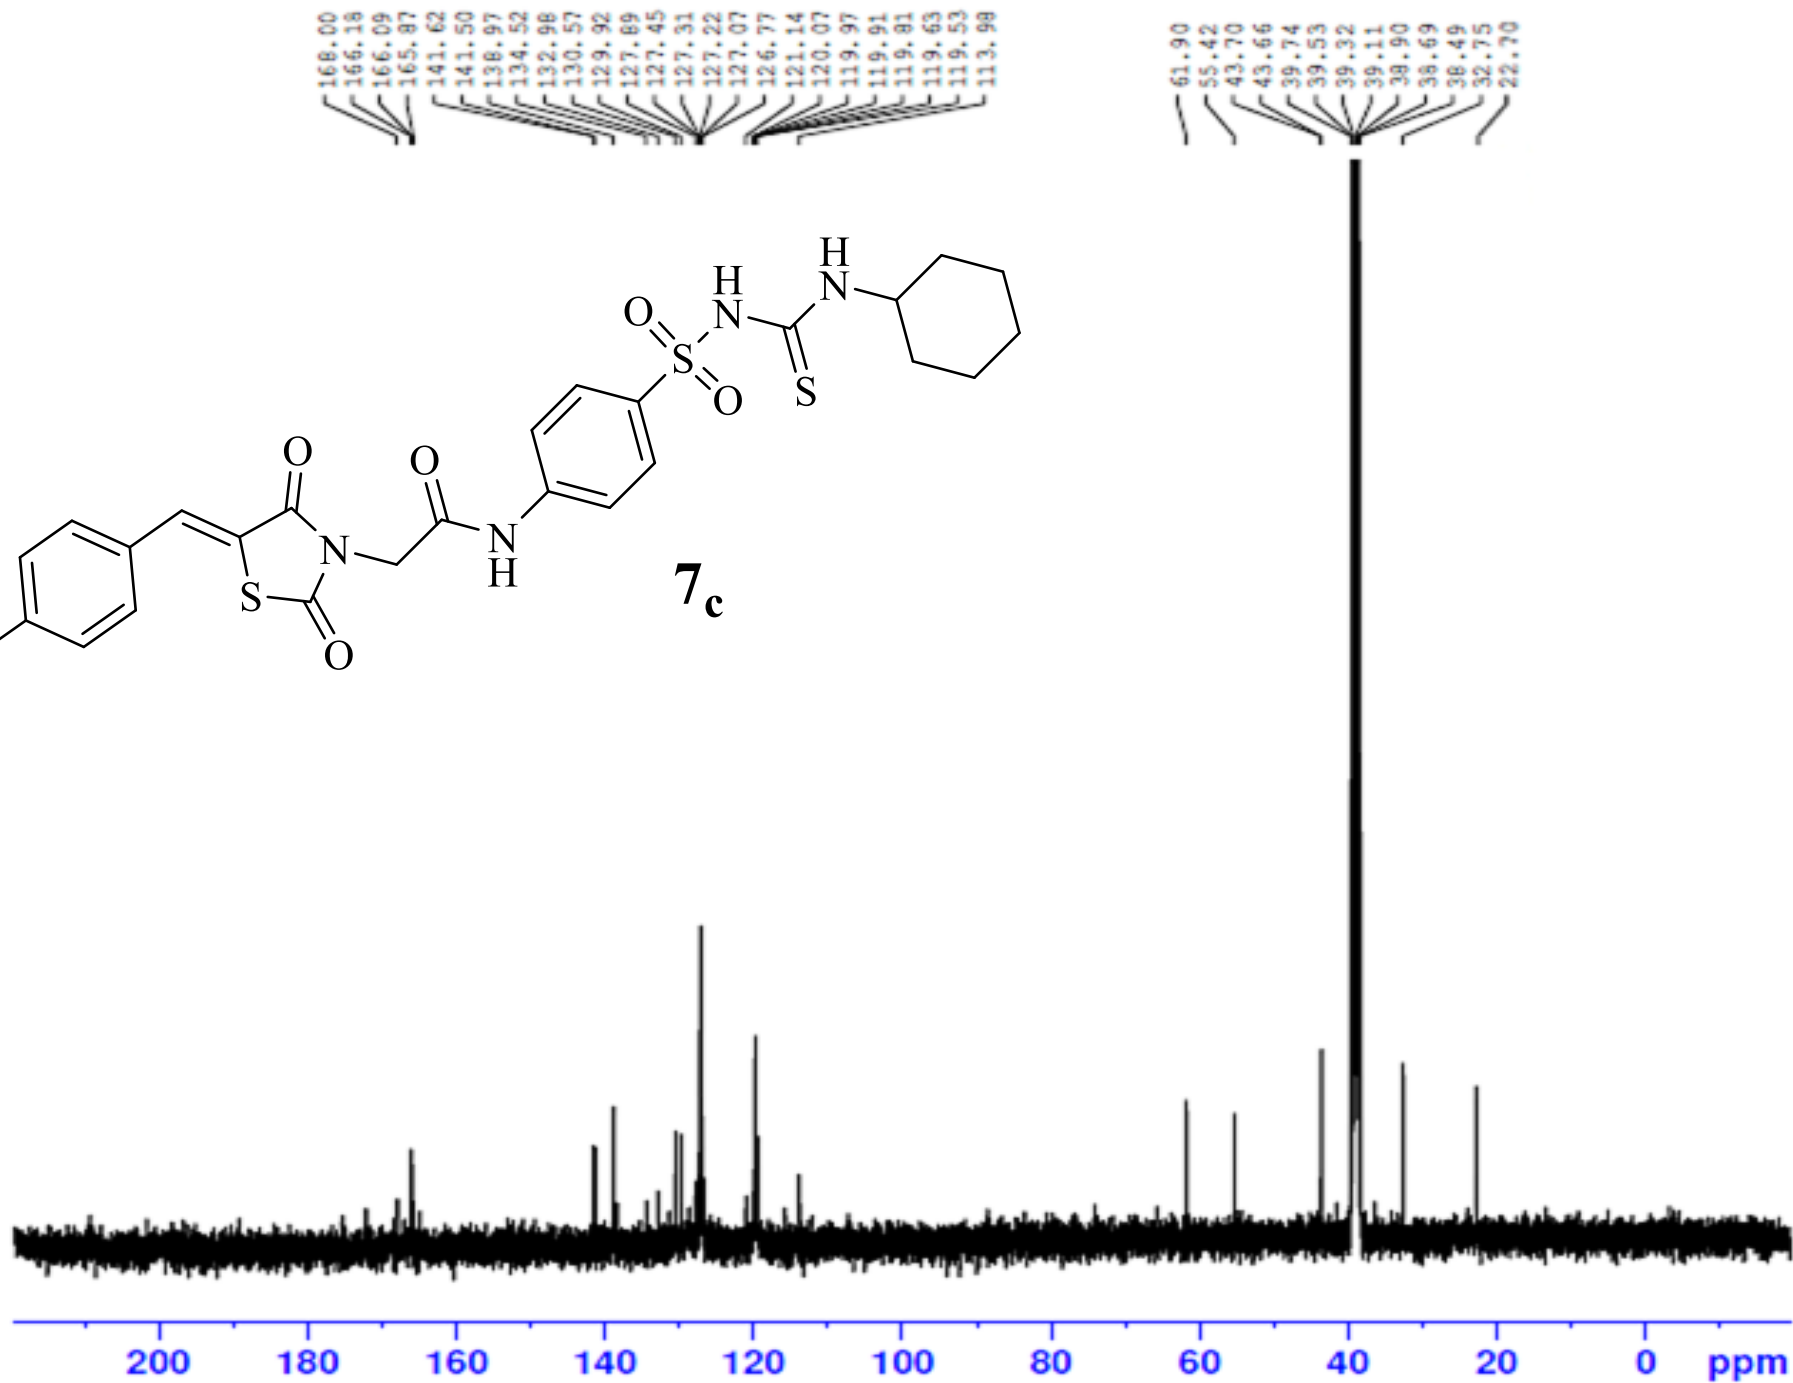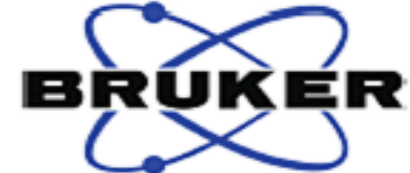

Current Data Parameters  
 NAME KE-E  
 EXPNO 2  
 PROCNO 1

F2 - Acquisition Parameters  
 Date\_ 20200927  
 Time 10.27  
 INSTRUM spect  
 PROBHD 5 mm PABBO BB/  
 PULPROG zgpg30  
 ID 65536  
 SOLVENT DMSO  
 NS 1783  
 DS 4  
 SWH 24038.461 Hz  
 FIDRES 0.366798 Hz  
 AQ 1.3631488 sec  
 RG 205.37  
 DW 20.800 usec  
 DE 6.50 usec  
 TE 300.0 K  
 D1 2.00000000 sec  
 D11 0.03000000 sec  
 TD0 1

----- CHANNEL f1 -----  
 SFO1 100.6278588 MHz  
 NUC1 13C  
 P1 10.00 usec  
 PLW1 47.00000000 W

----- CHANNEL f2 -----  
 SFO2 400.1516006 MHz  
 NUC2 1H  
 CPDPRG[2] waltz16  
 PCPD2 90.00 usec  
 PLW2 18.00000000 W  
 PLW12 0.34722000 W  
 PLW13 0.28125000 W

F2 - Processing parameters  
 SI 32768  
 SF 100.6177975 MHz  
 WDW EM  
 SSB 0  
 LB 1.00 Hz  
 GB 0  
 PC 1.40

khaled-aladel-H#36 RT: 0.62 AV: 1 SB: 2 2.24, 2.34 NL: 5.43E2  
T: {0,0} + cEIFull ms [40.00-1000.00]

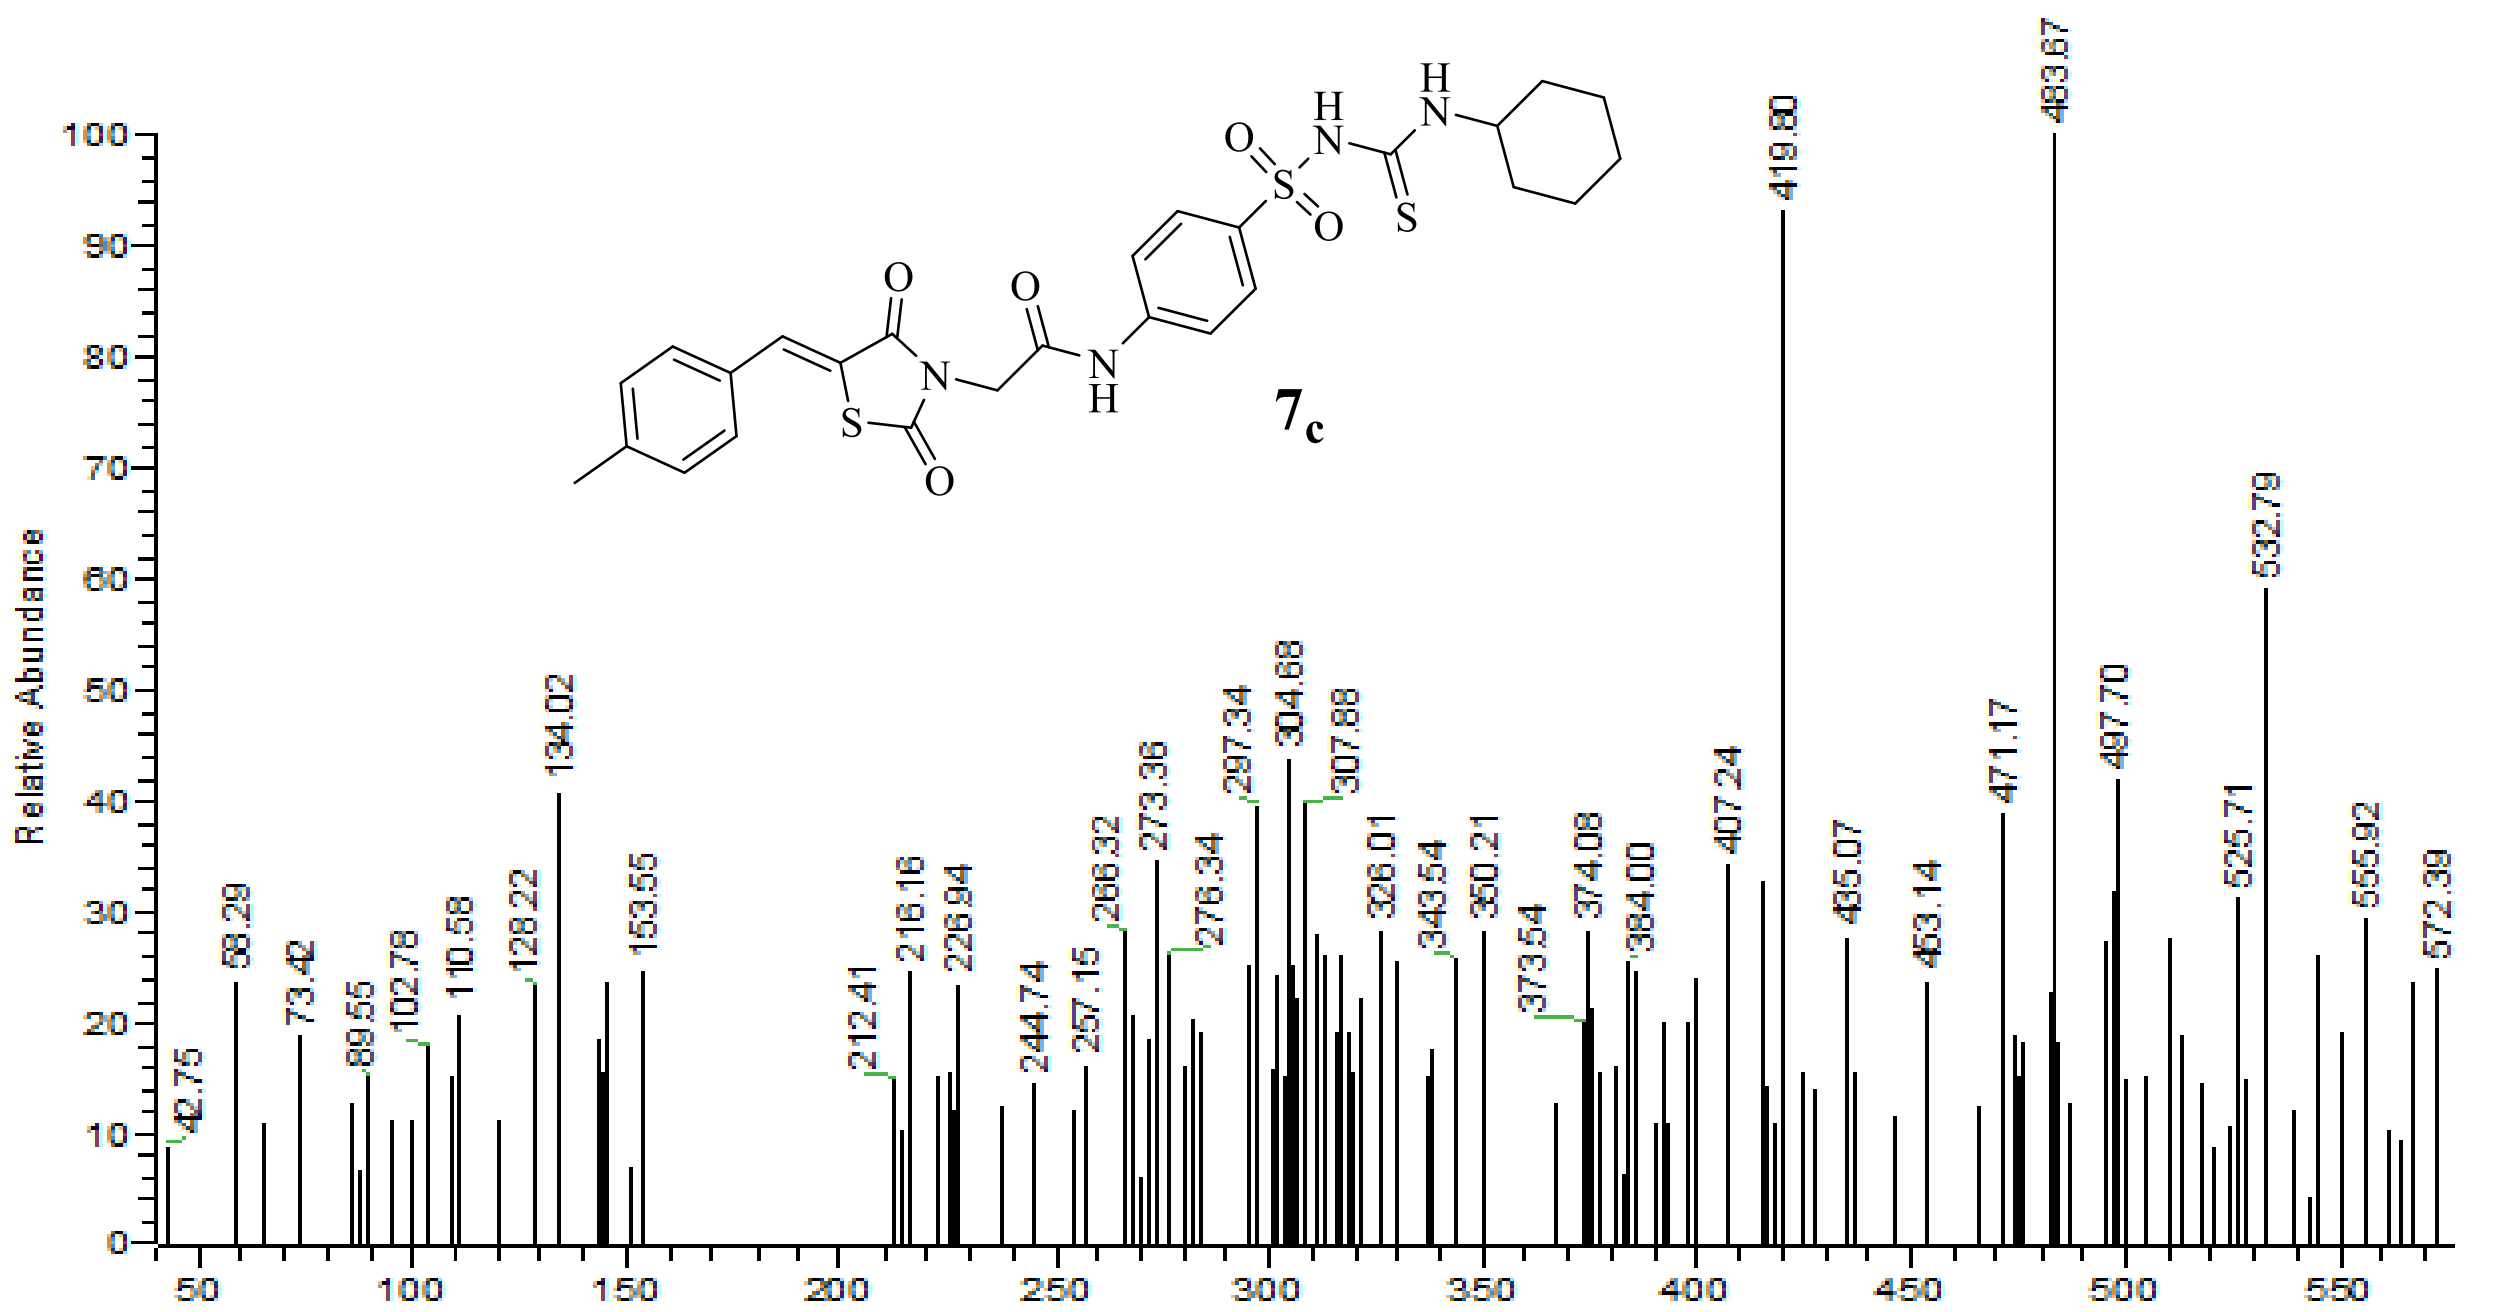

Supplement: s1 [file s1]
